# Supplementary material
Source: PubMed Central journal article supplement (PMC10482833)

**Figure 1N**

**GFPT1**

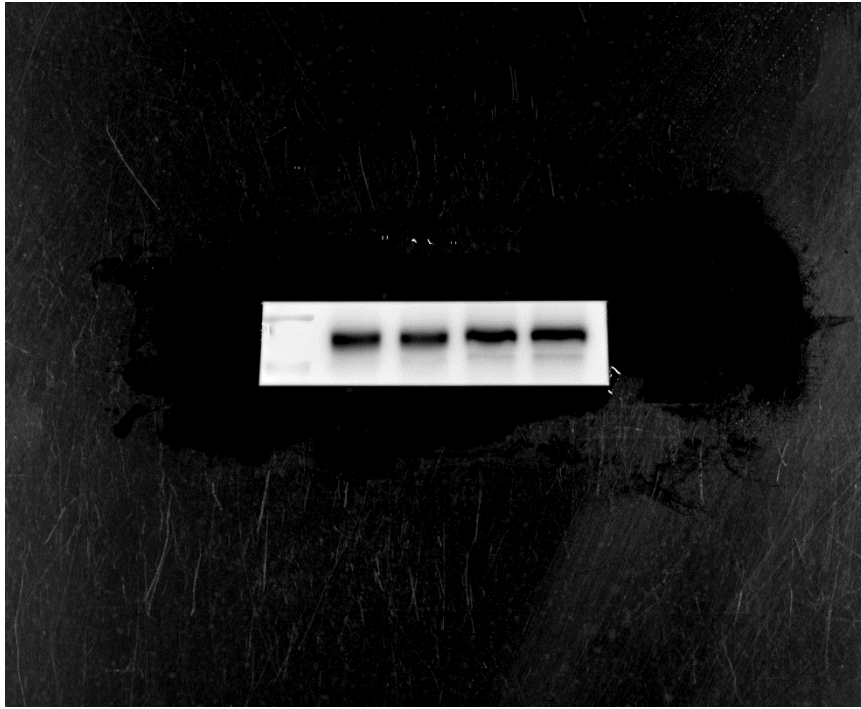

**$\beta$ -ACTIN**

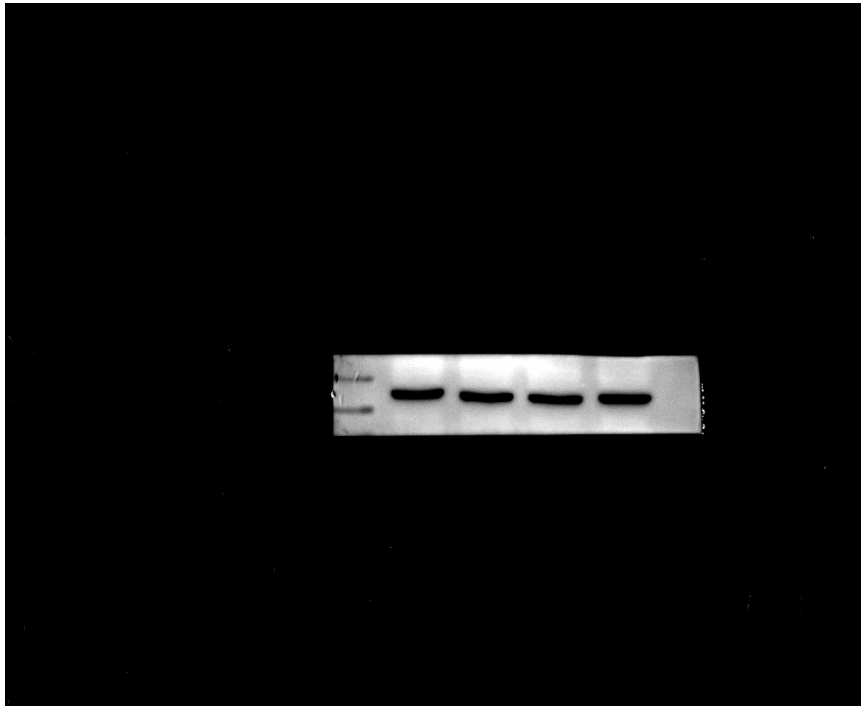

**Figure 3D**

**GFPT1**

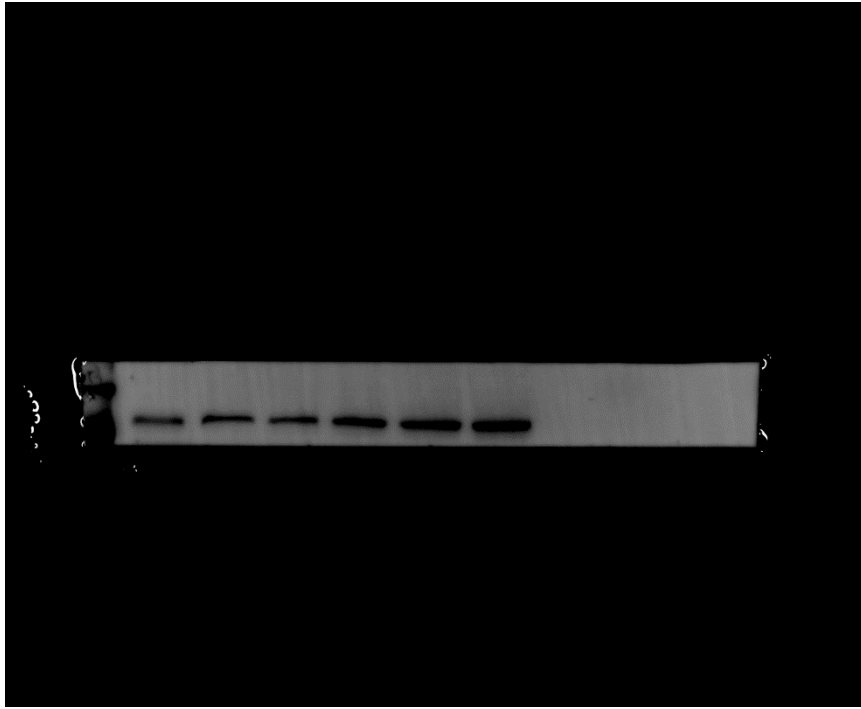

**O-GlcNAc**

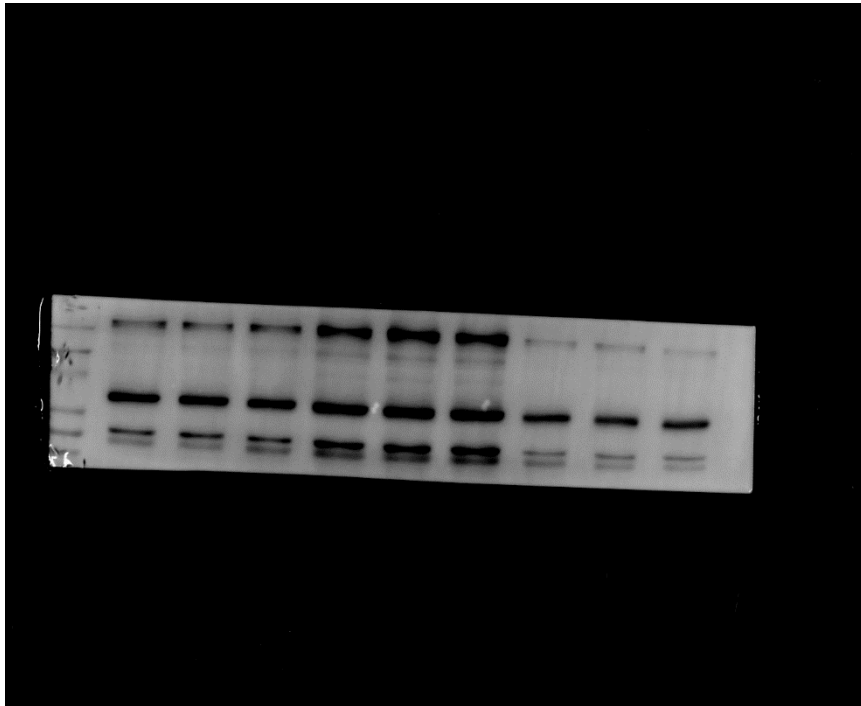

# $\beta$ -ACTIN

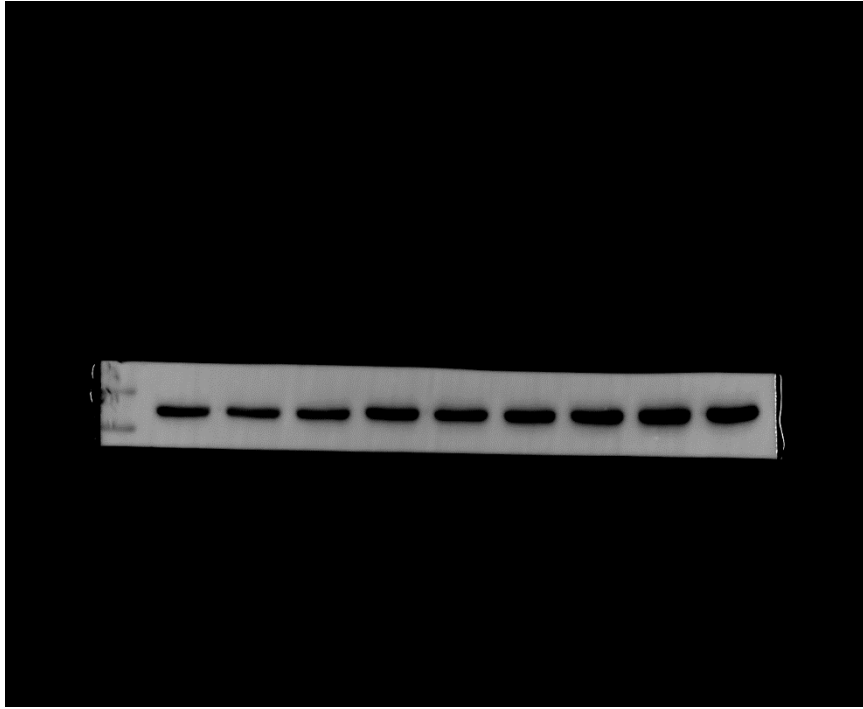

**Figure 3N**

**SLC7A11**

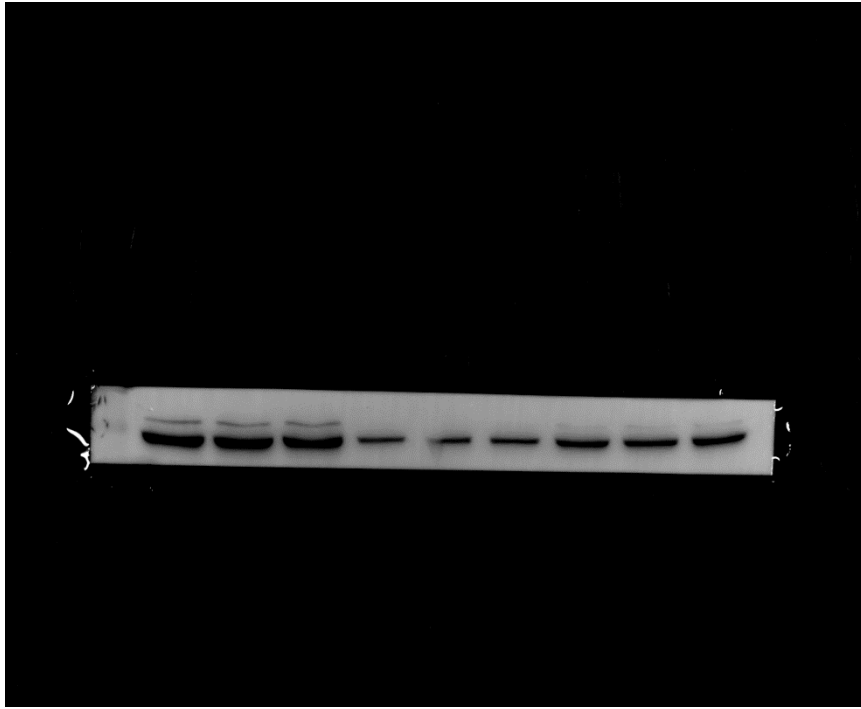

**GPX4**

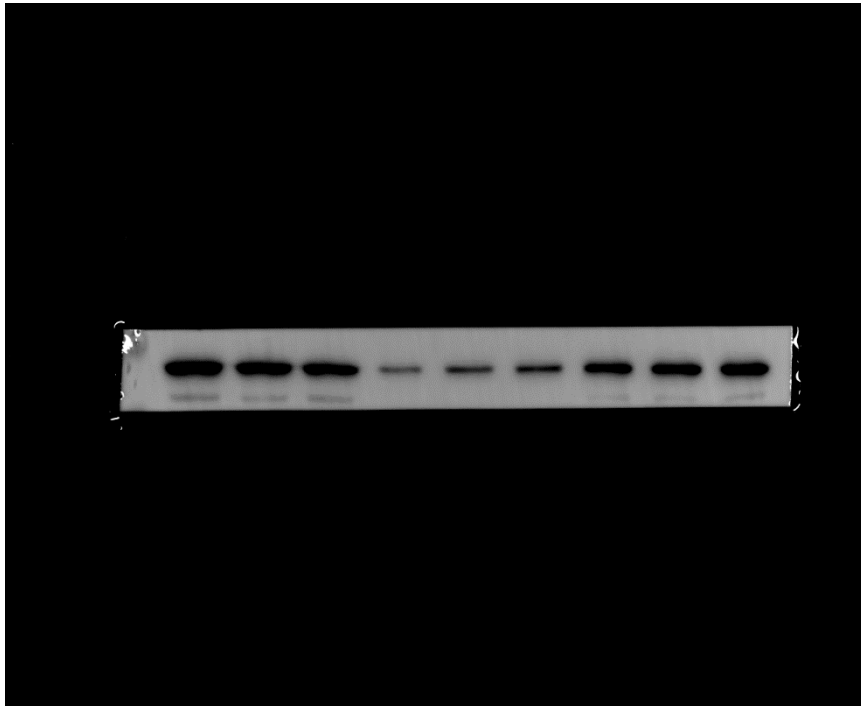

**$\beta$ -ACTIN**

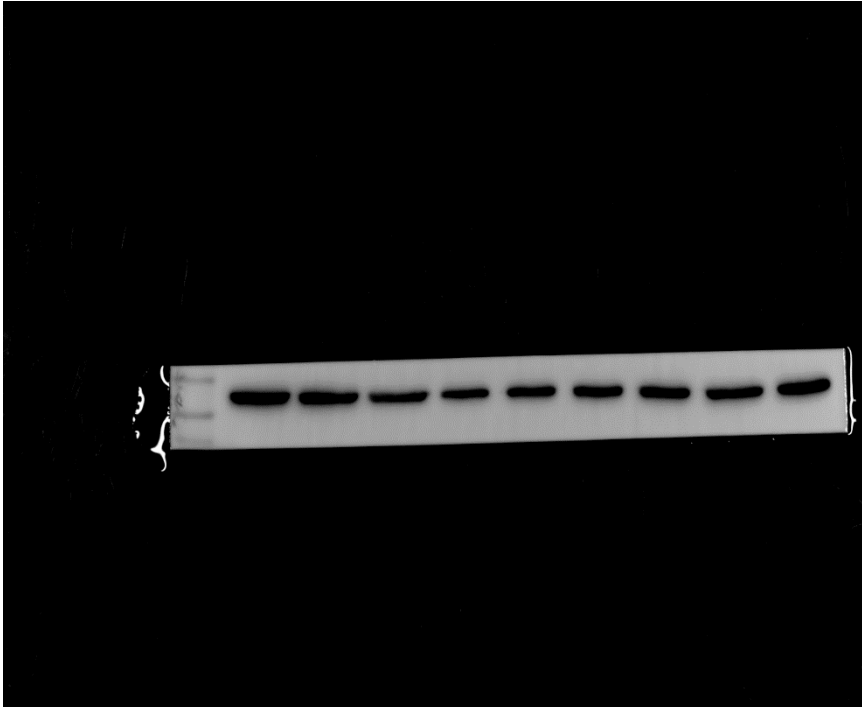

**Figure 4D**

**sWGA**

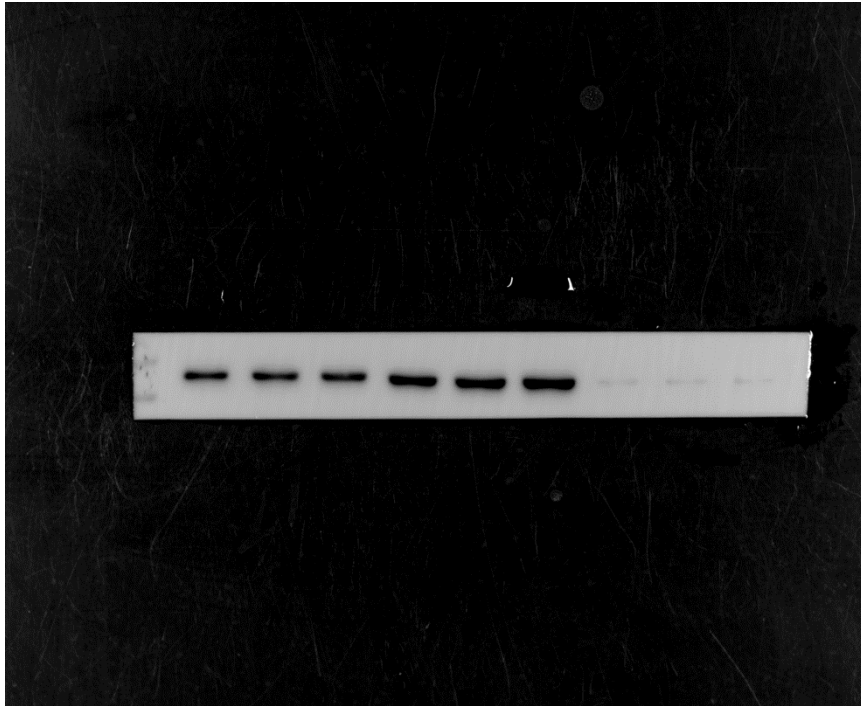

**Input BACH2**

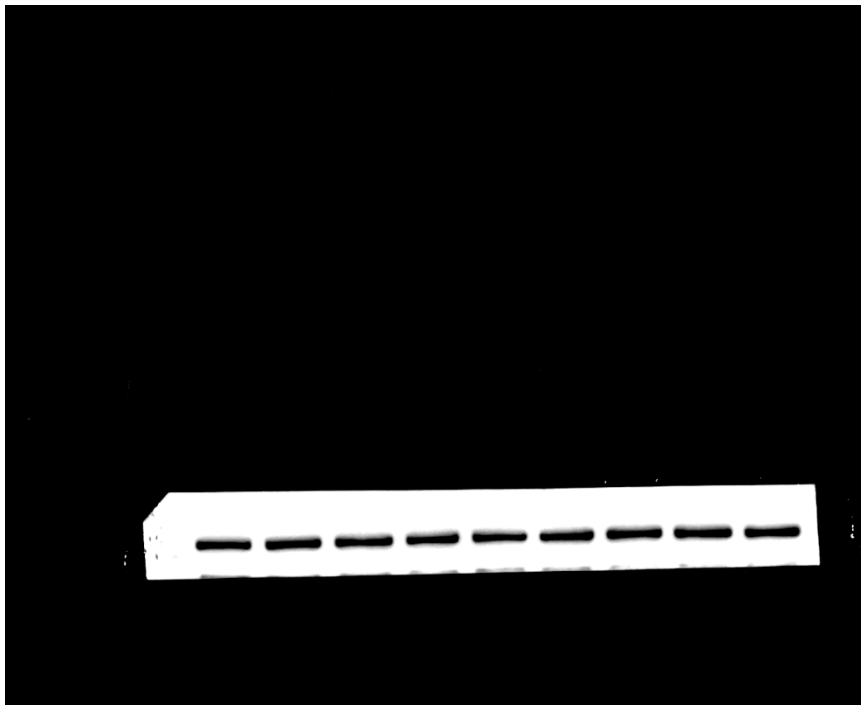

**Figure 4E**

**IP-HA**

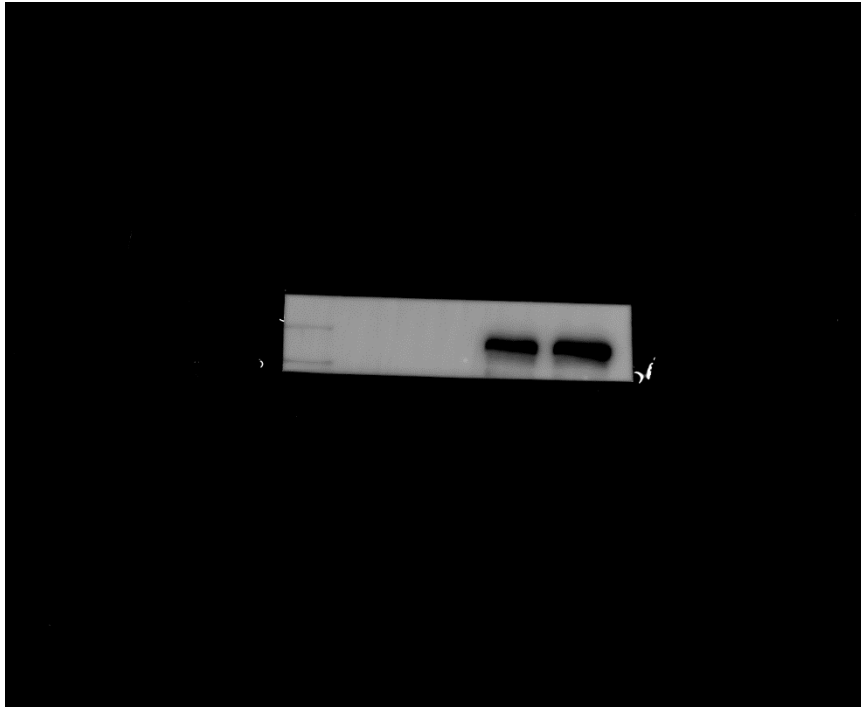

**IP-Flag**

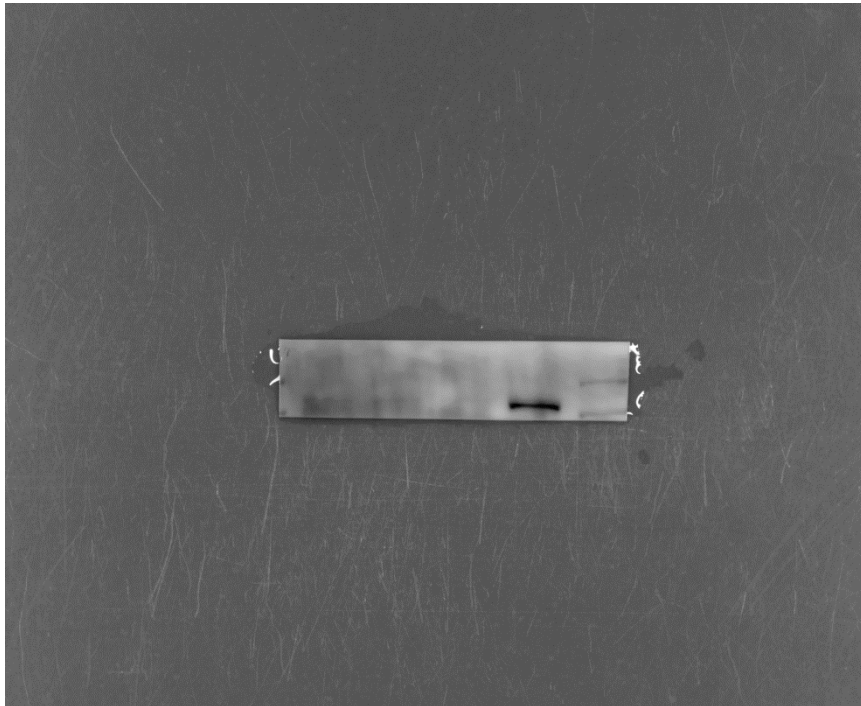

## Input-HA

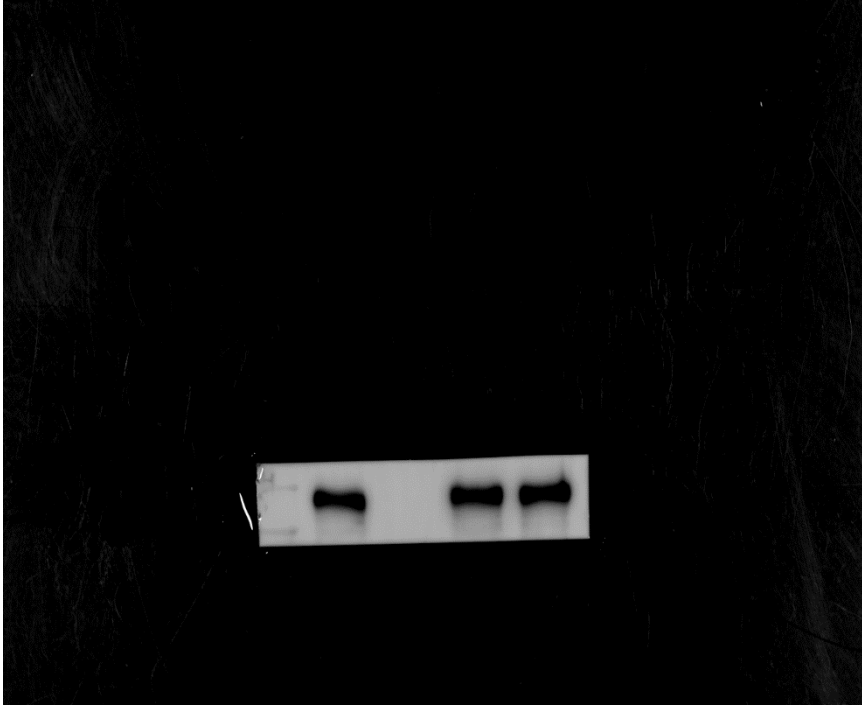

## Input-Flag

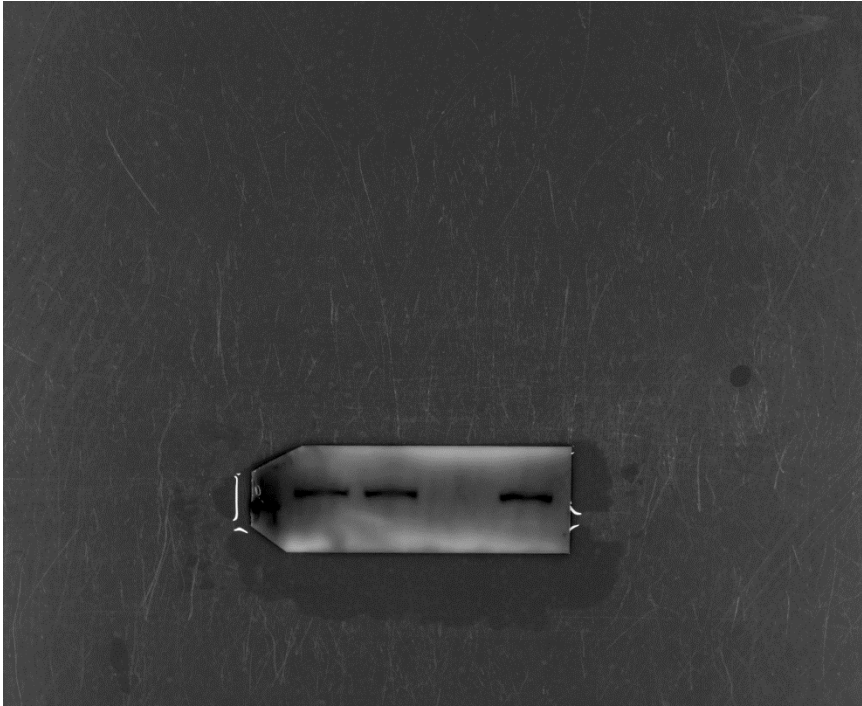



**Figure 4F**

**IP-Flag**

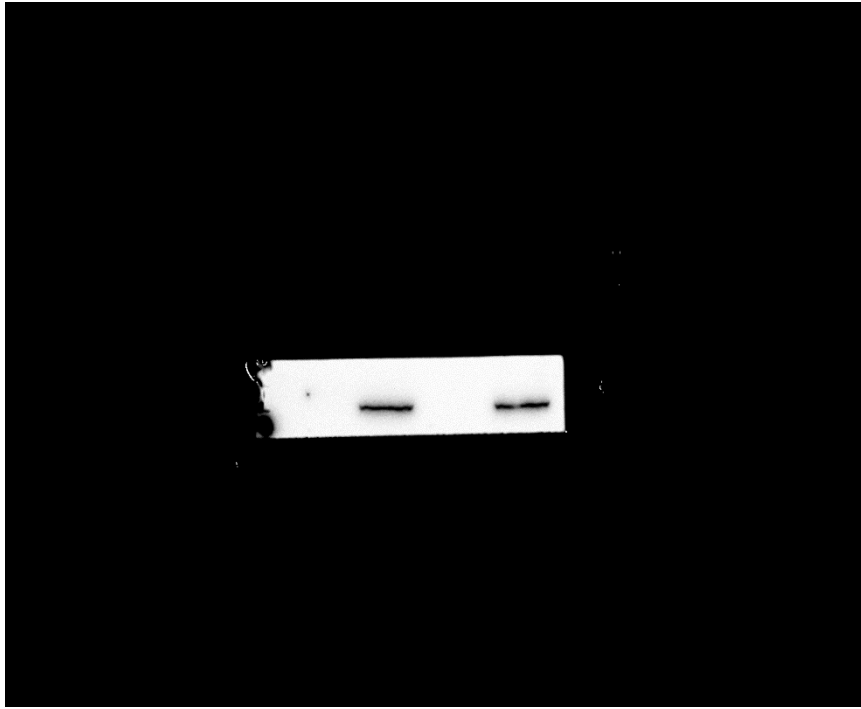

**IP-HA**

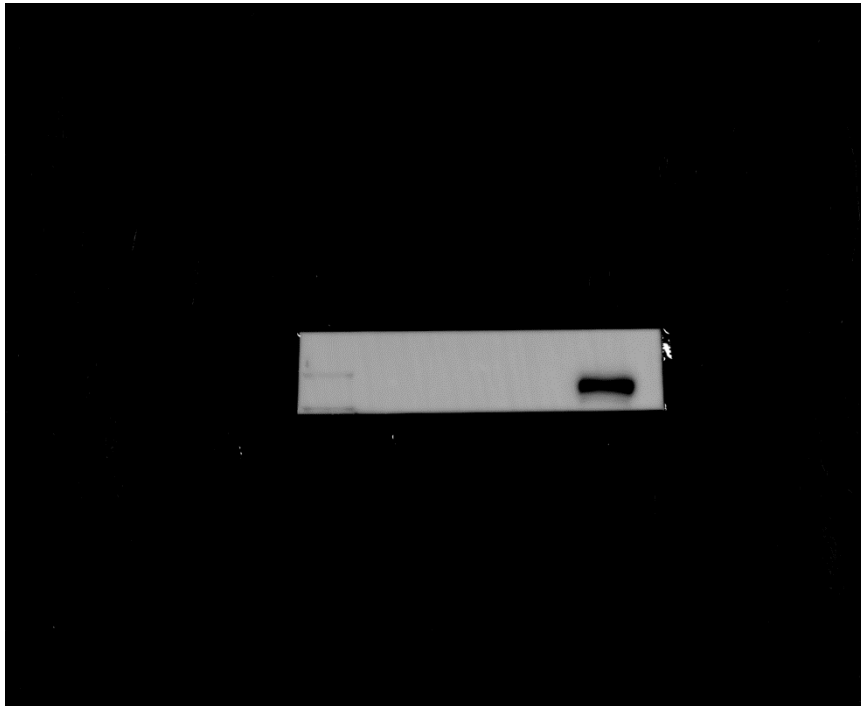

## Input-Flag

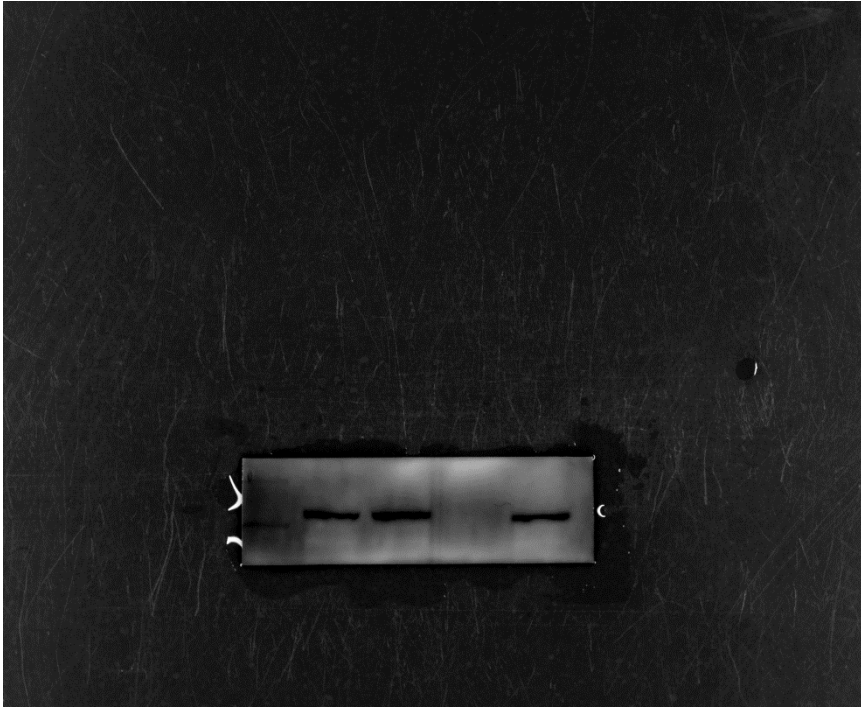

## Input-HA

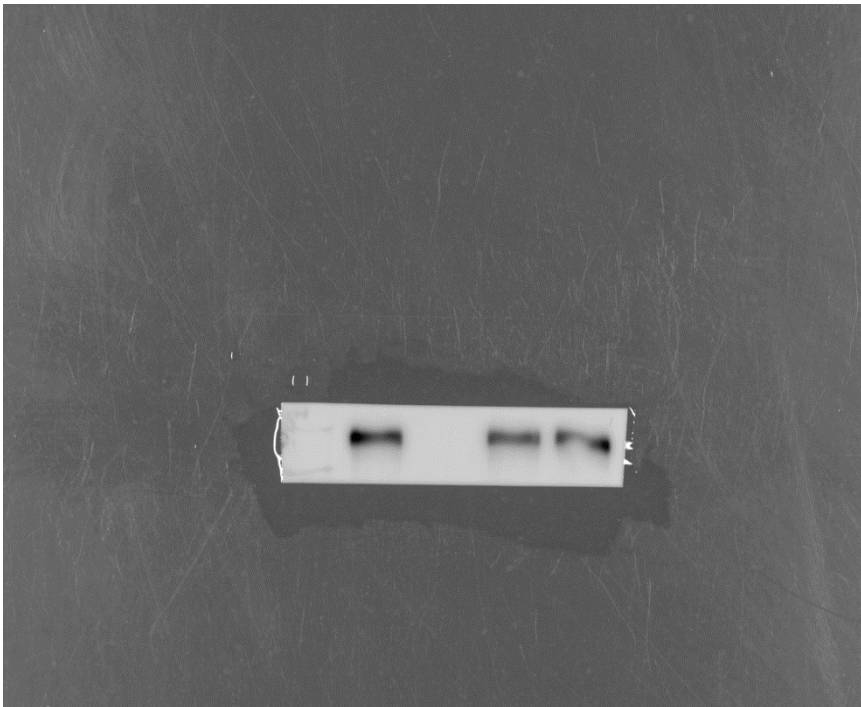

**Figure 4G**

**IP-BACH2**

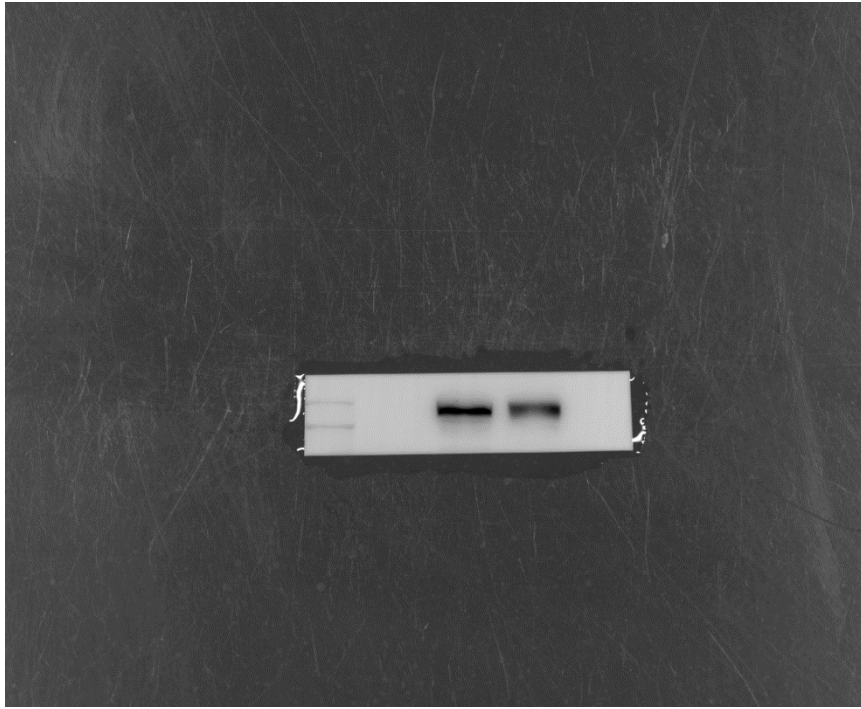

**IP-OGT**

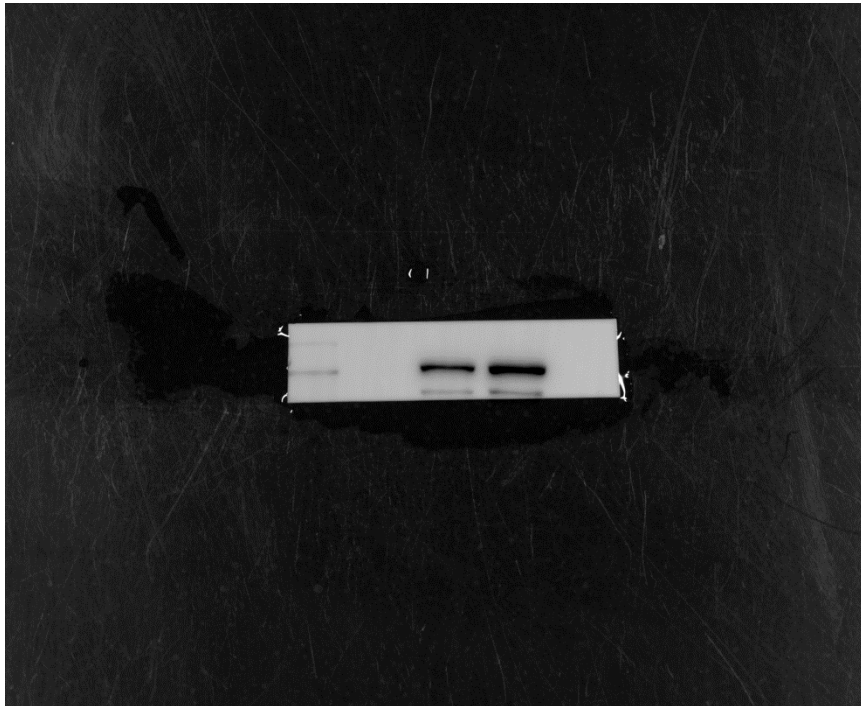

## Input-BACH2

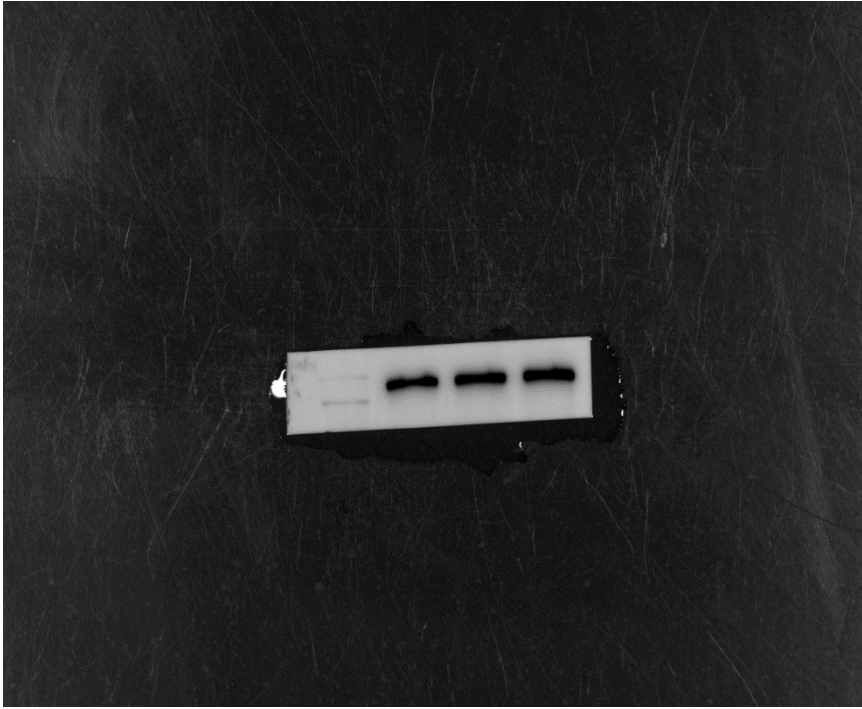

## Input-OGT

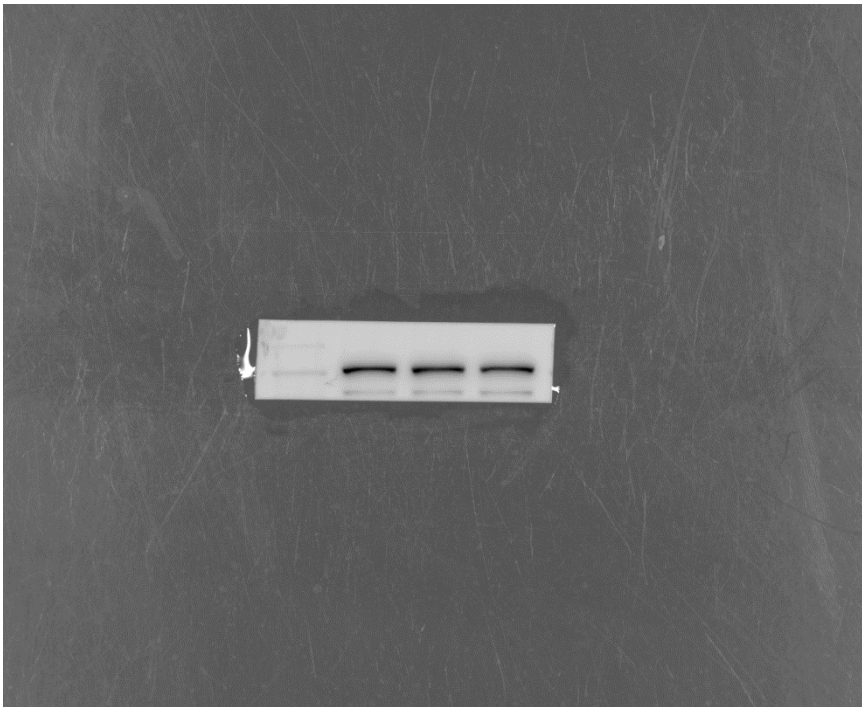

**Figure 5A**

**HA**

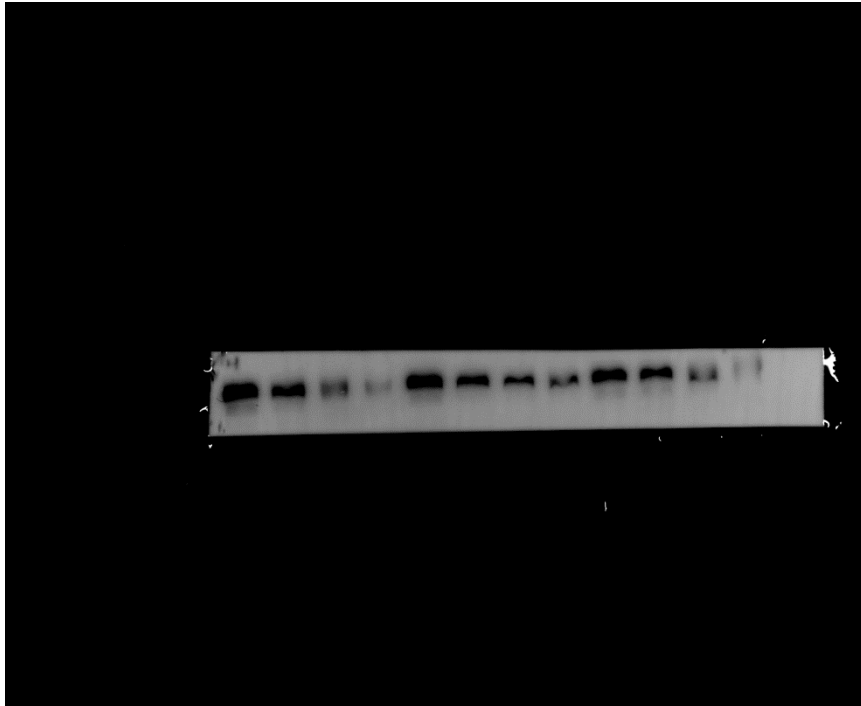

**$\beta$ -ACTIN**

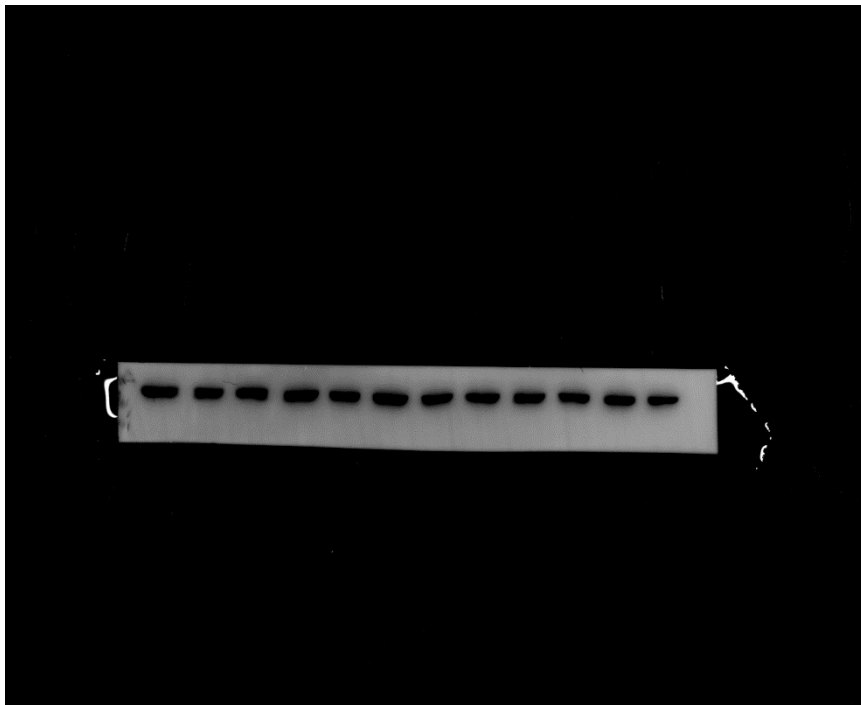

**Figure 5B**

**HA**

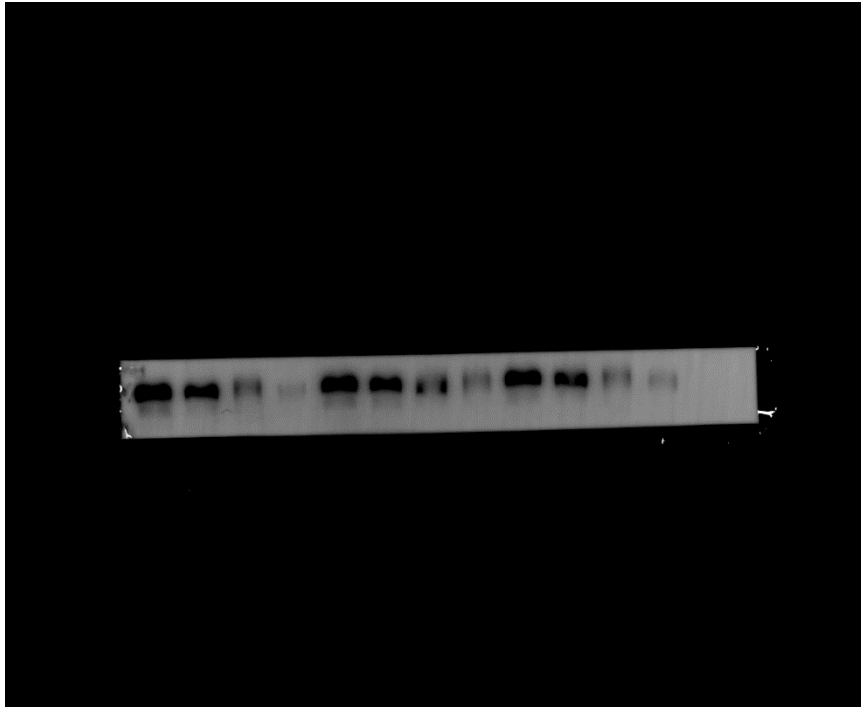

**$\beta$ -ACTIN**

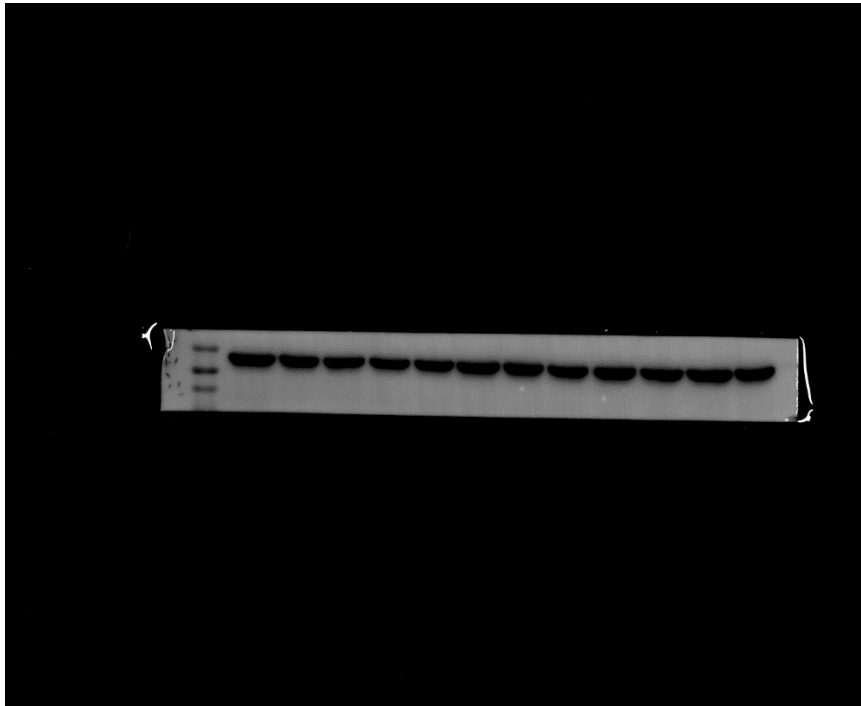

**Figure 5E**

**UB-Flag**

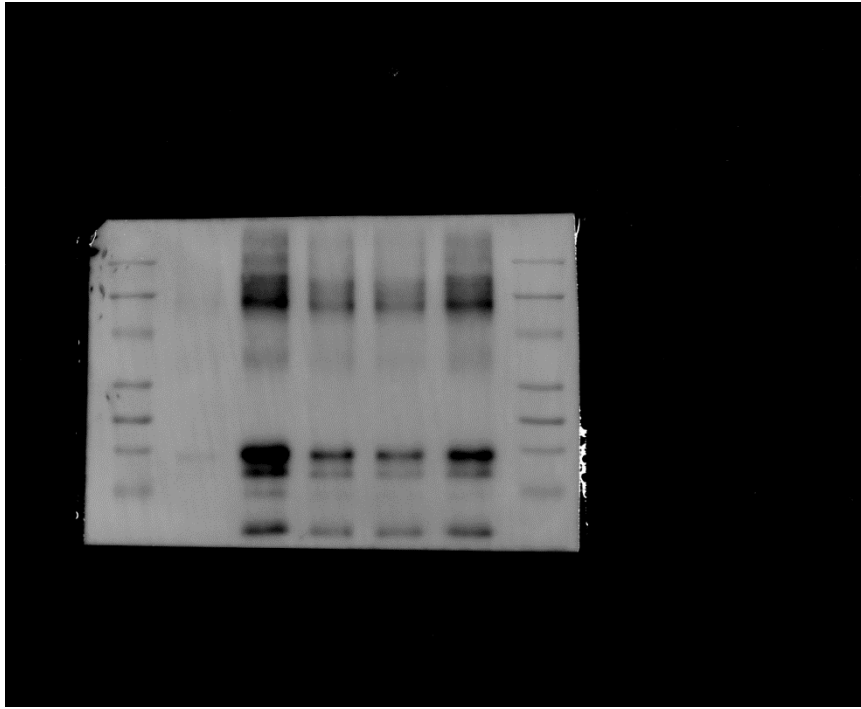

**IP-HA**

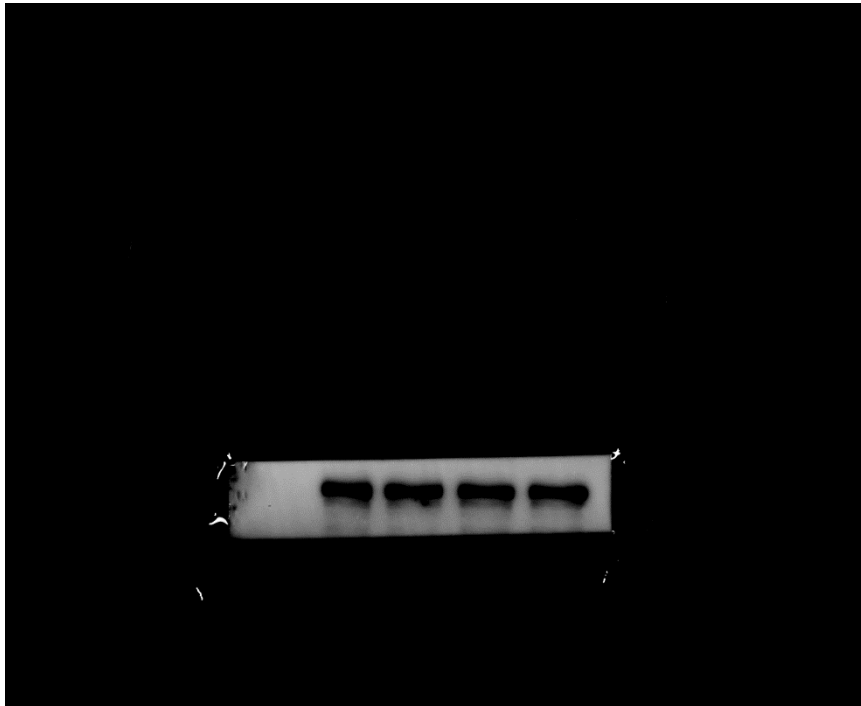

## Input-HA

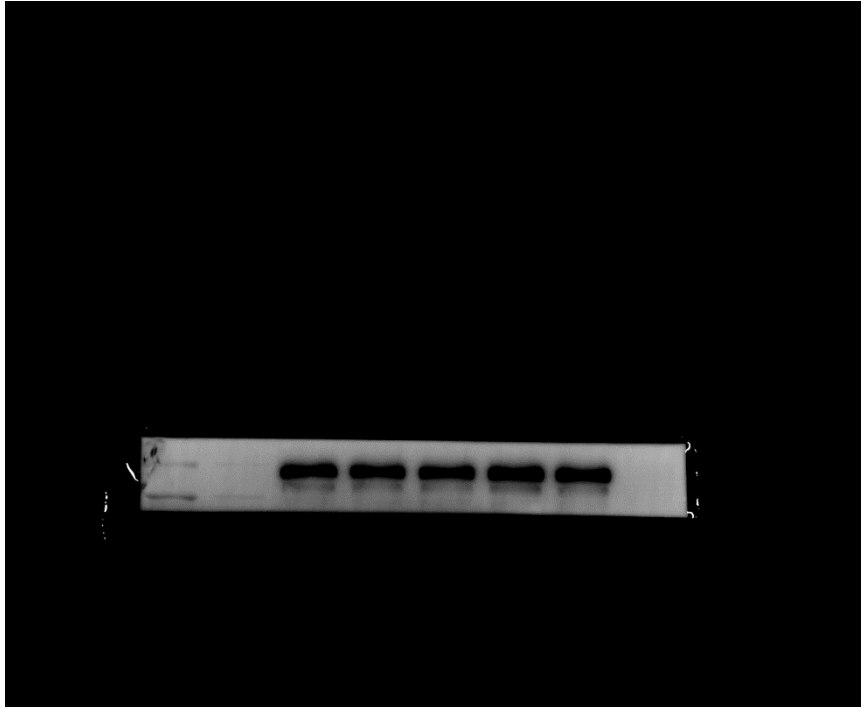



**Figure 5F**

**UB-Flag**

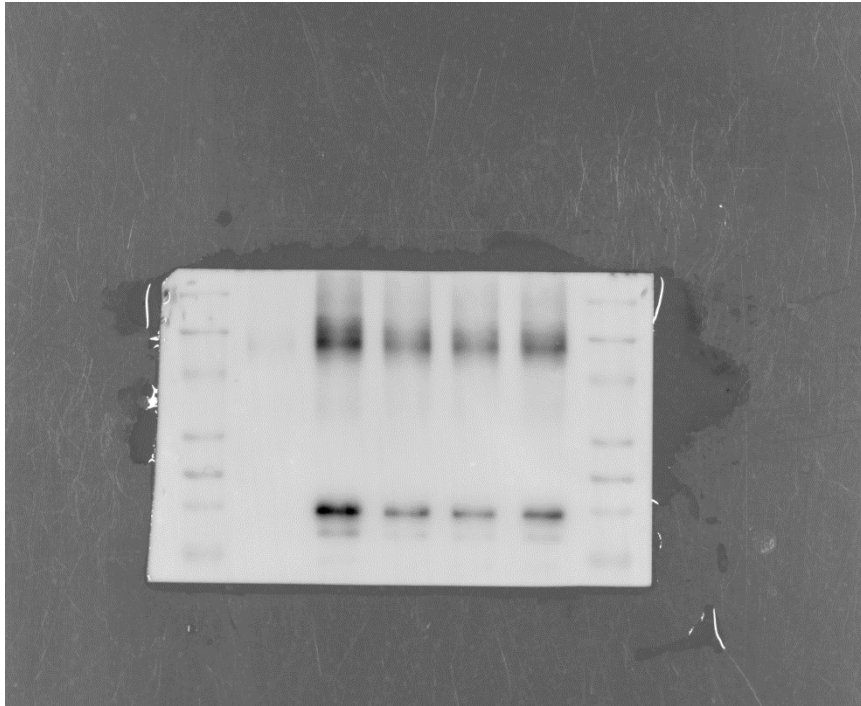

**IP-HA**

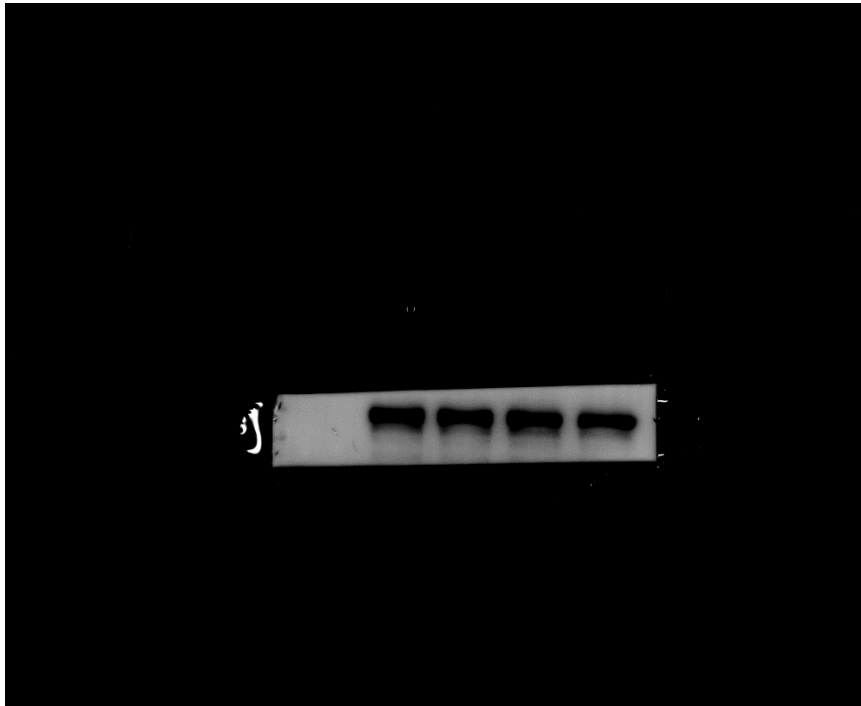

## Input-HA

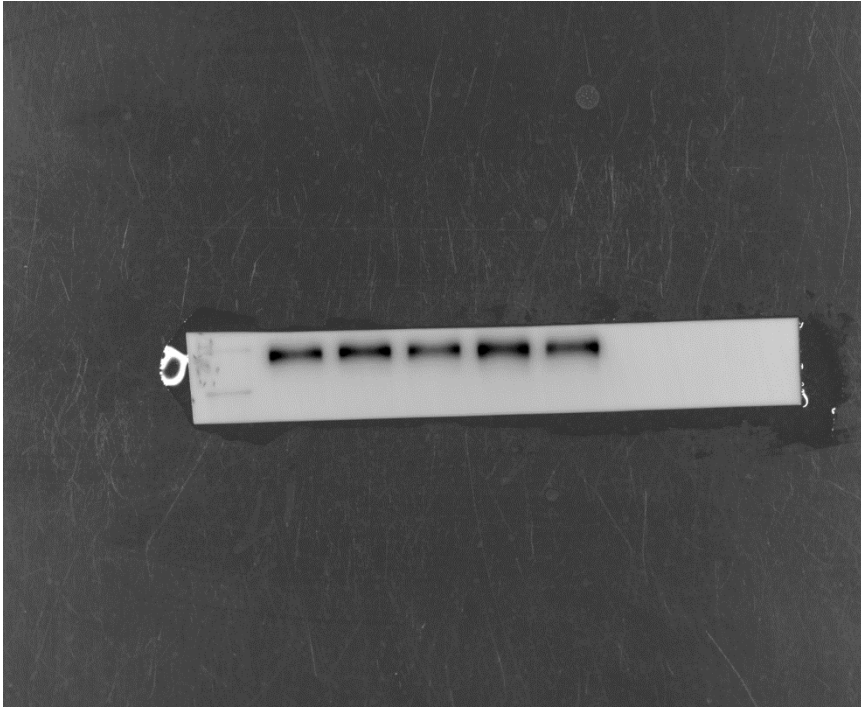

**Figure 5H**

**BACH2**

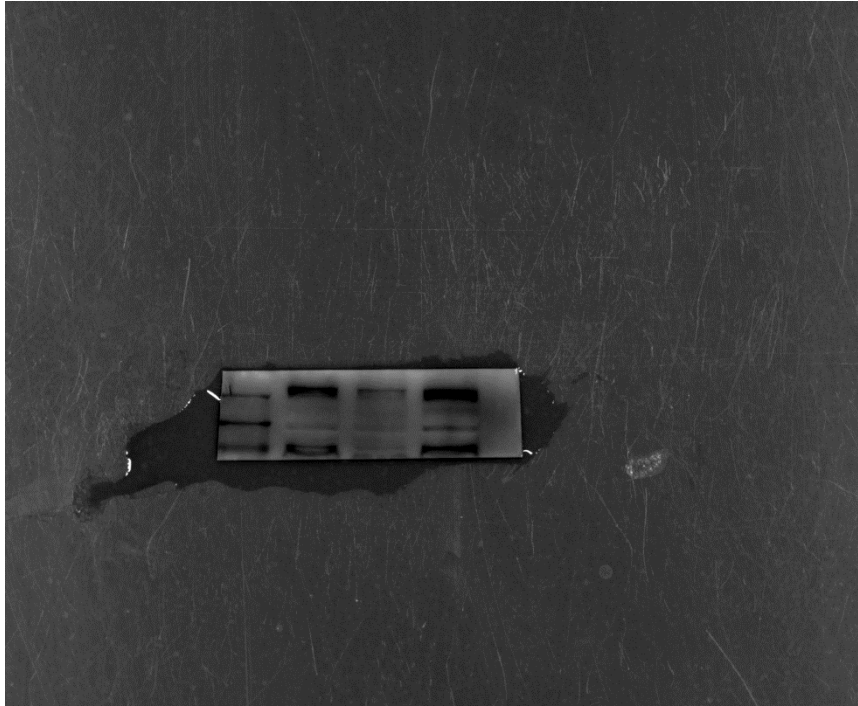

**$\beta$ -ACTIN**

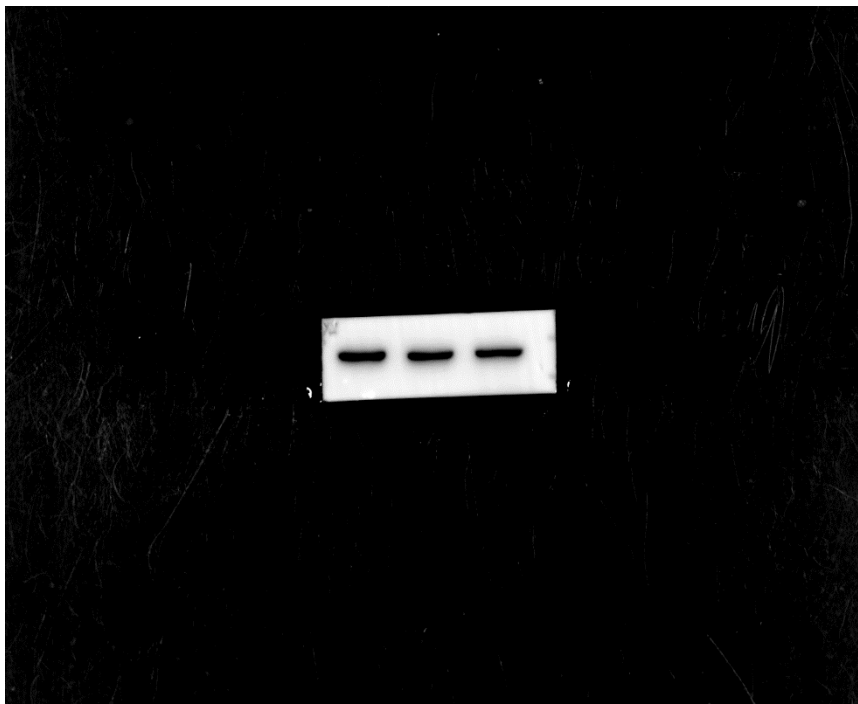

**Figure 5J**

**BACH2**

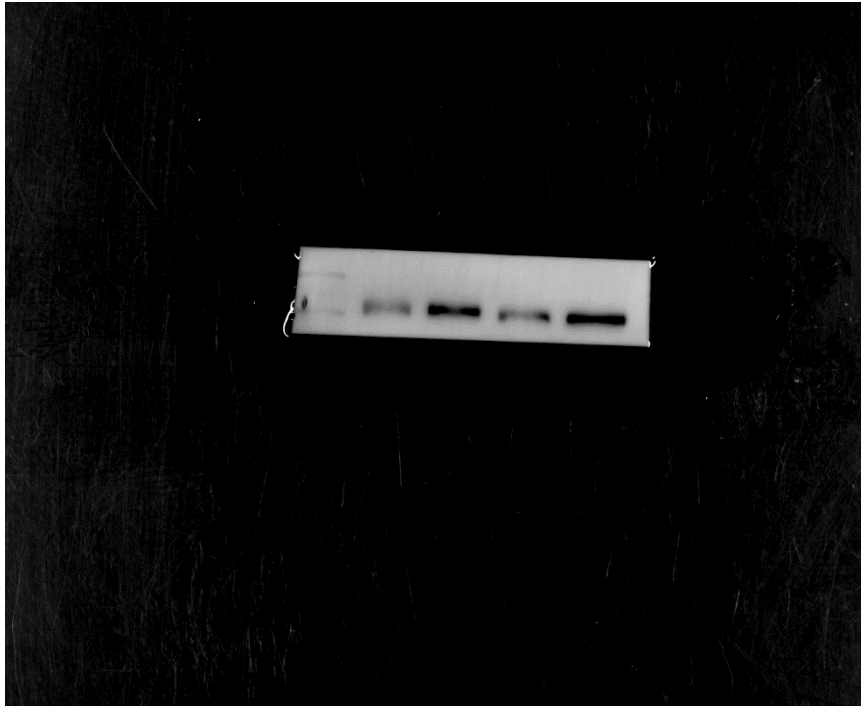

**$\beta$ -ACTIN**

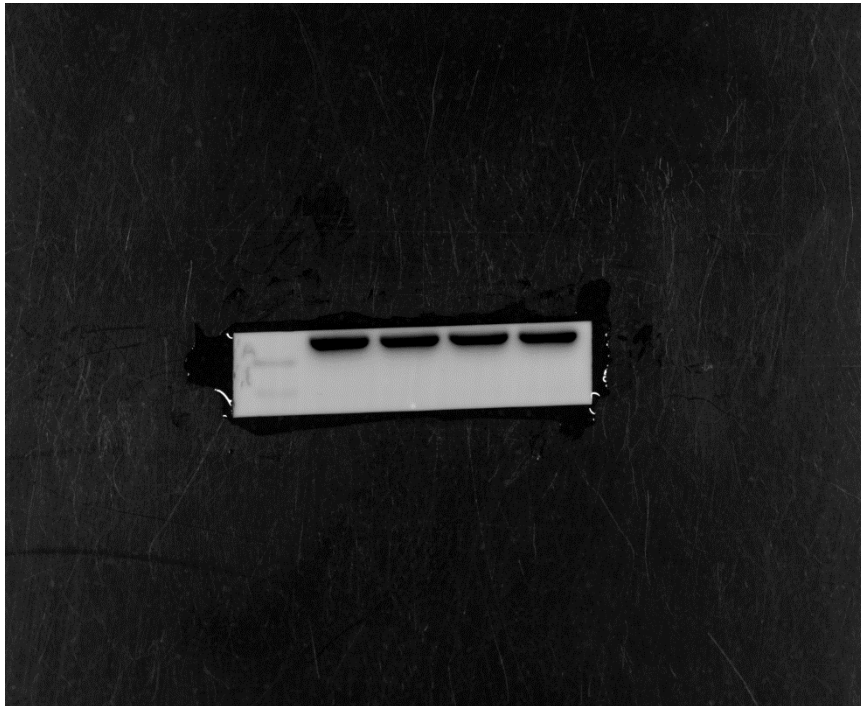

**Figure 5L**

**BACH2**

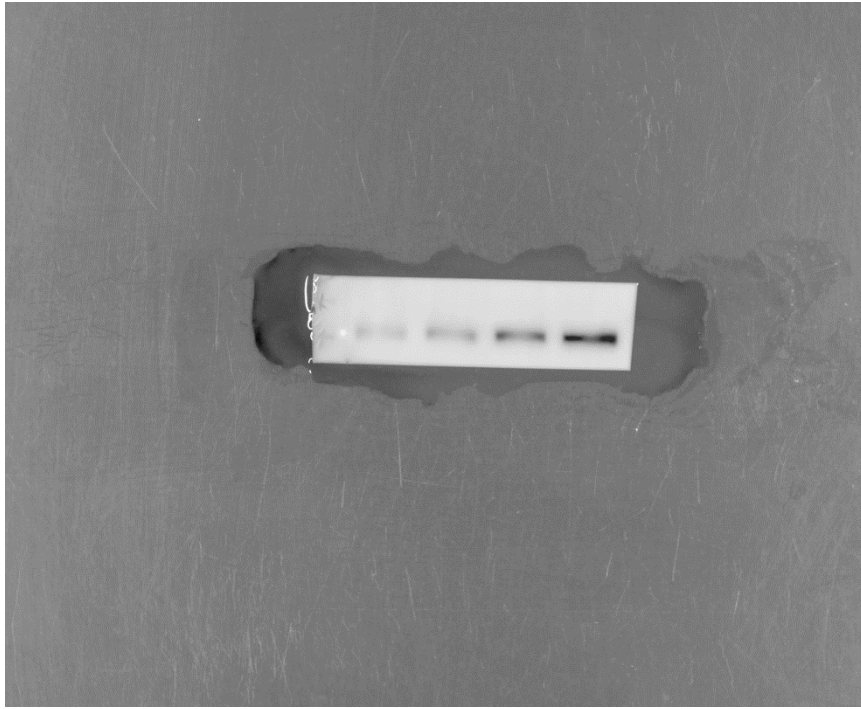

**$\beta$ -ACTIN**

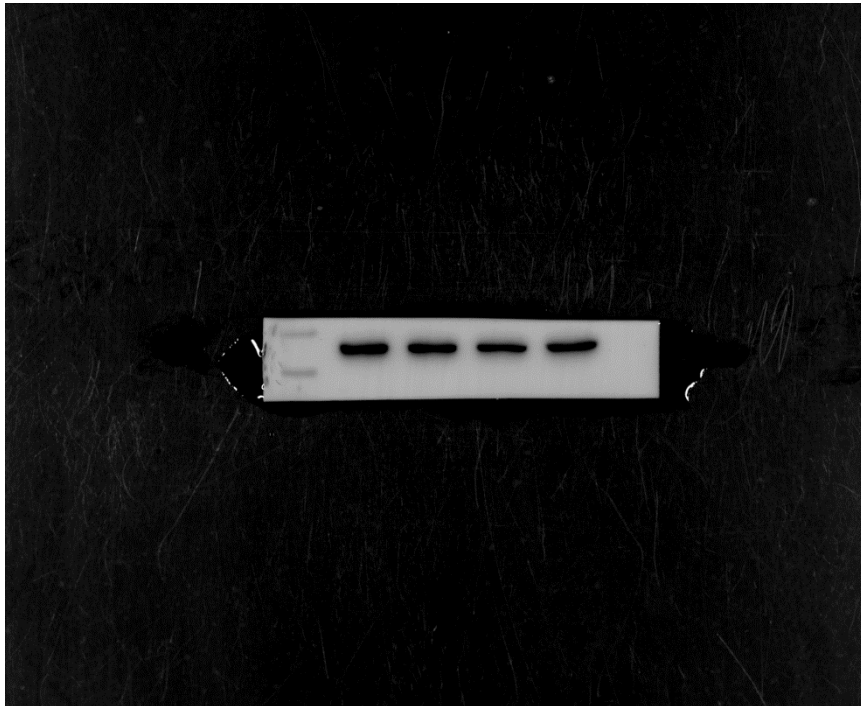

**Figure 5N**

**HA**

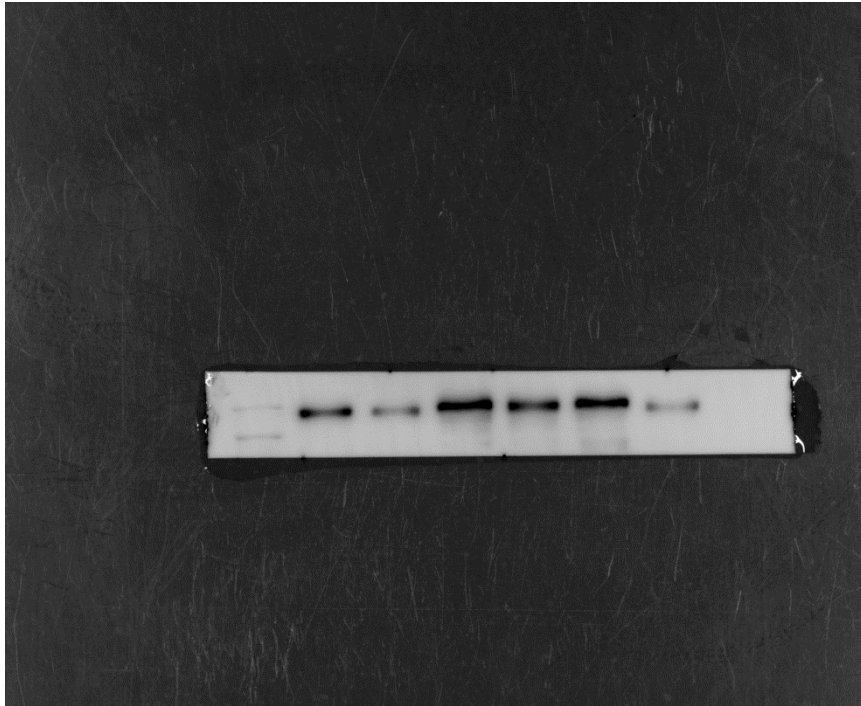

**GAPDH**

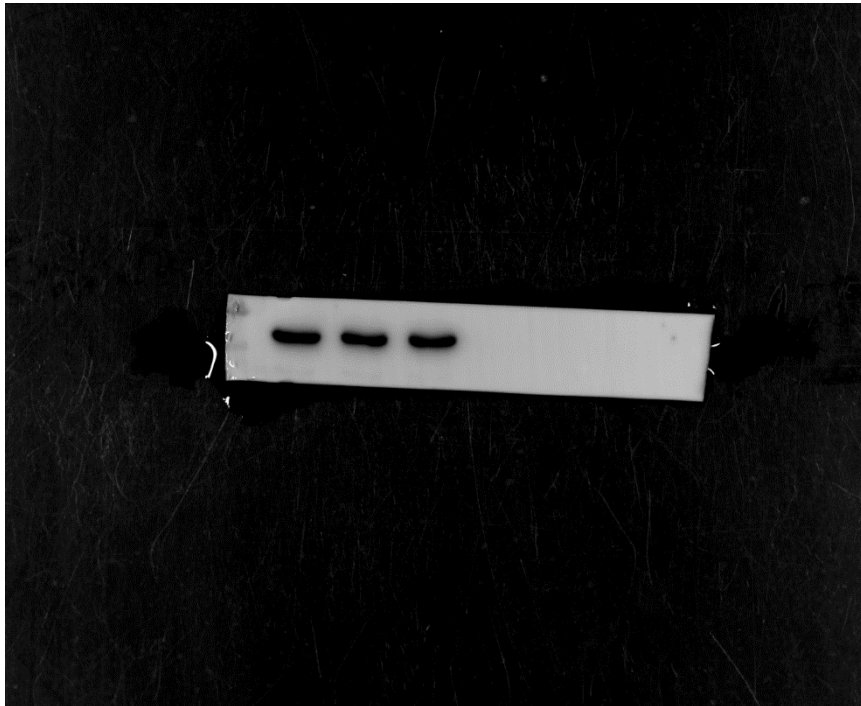

# PCNA

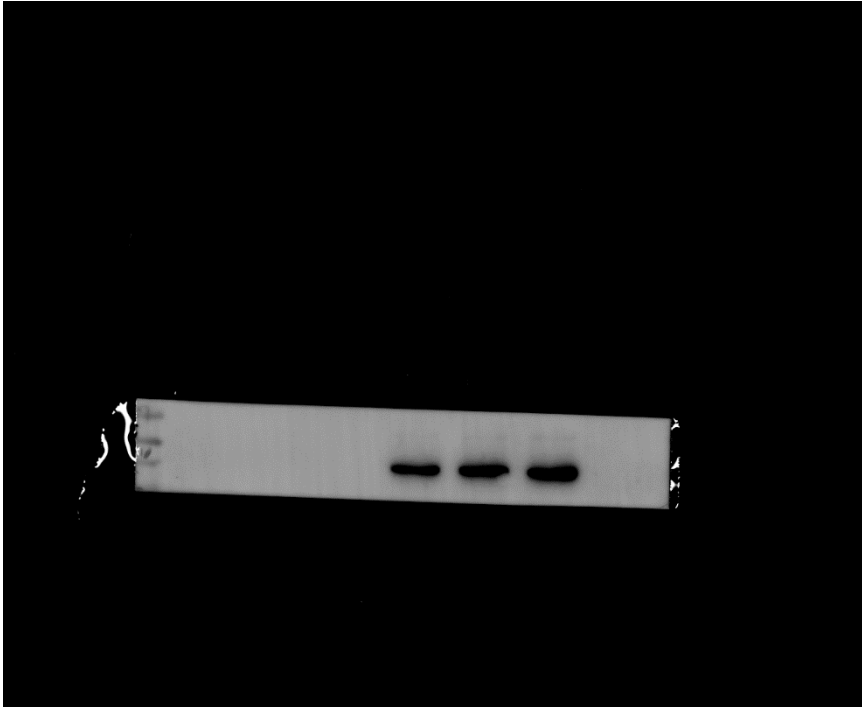

**Figure 7K**

**GFPT1**

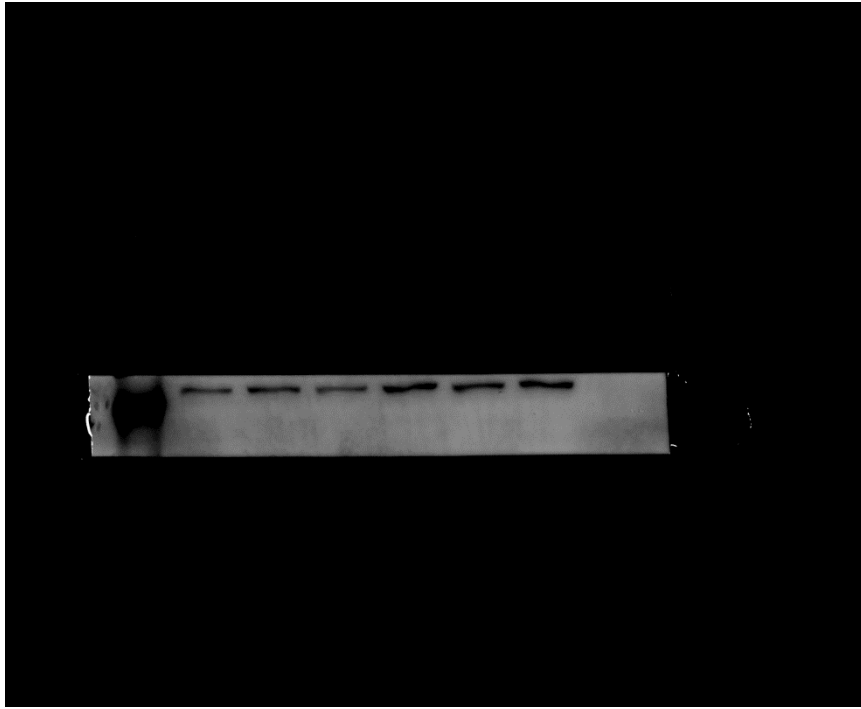

**O-GlcNAc**

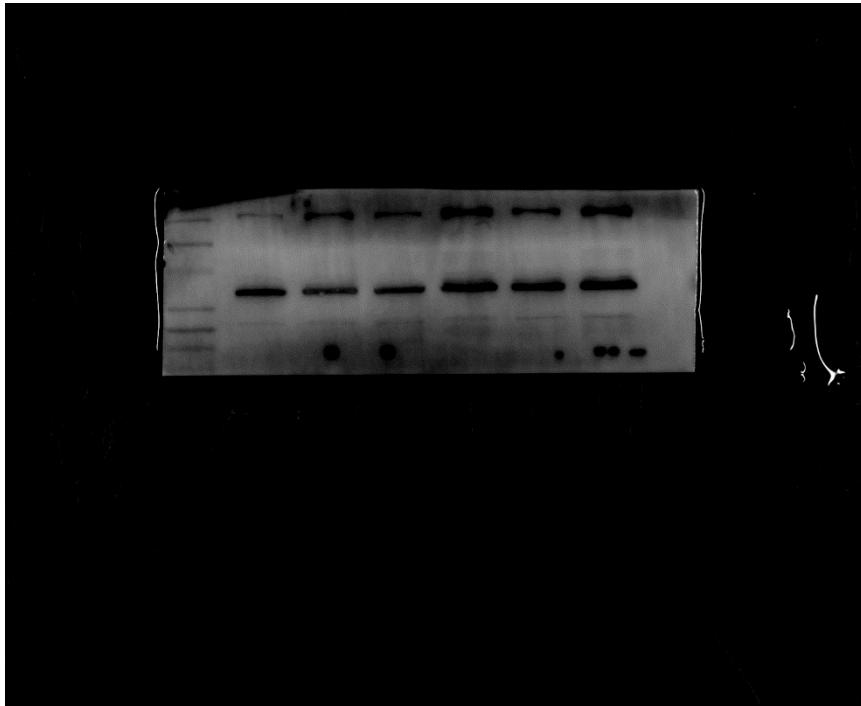



**BACH2**

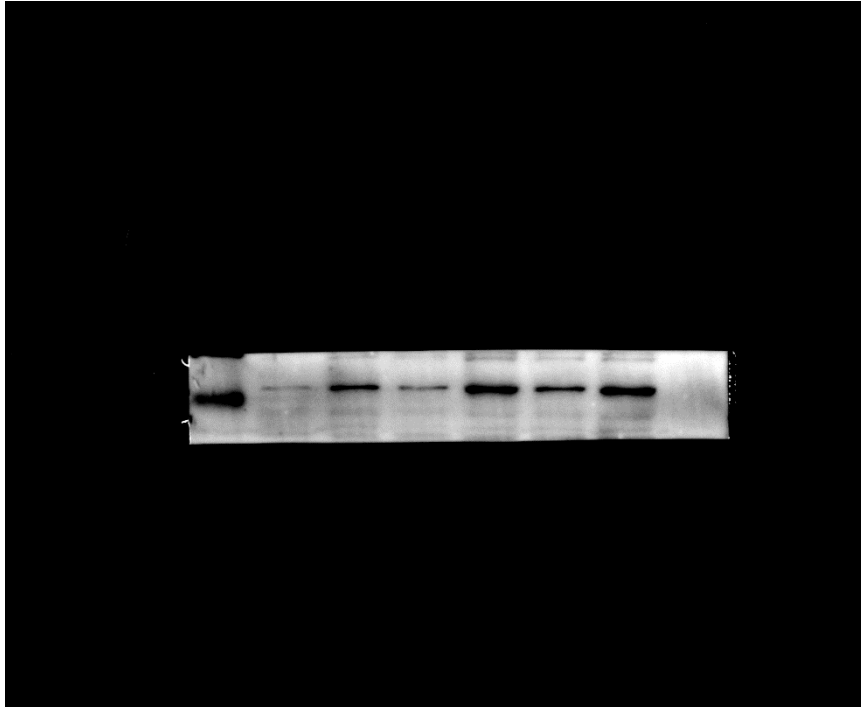

**SLC7A11**

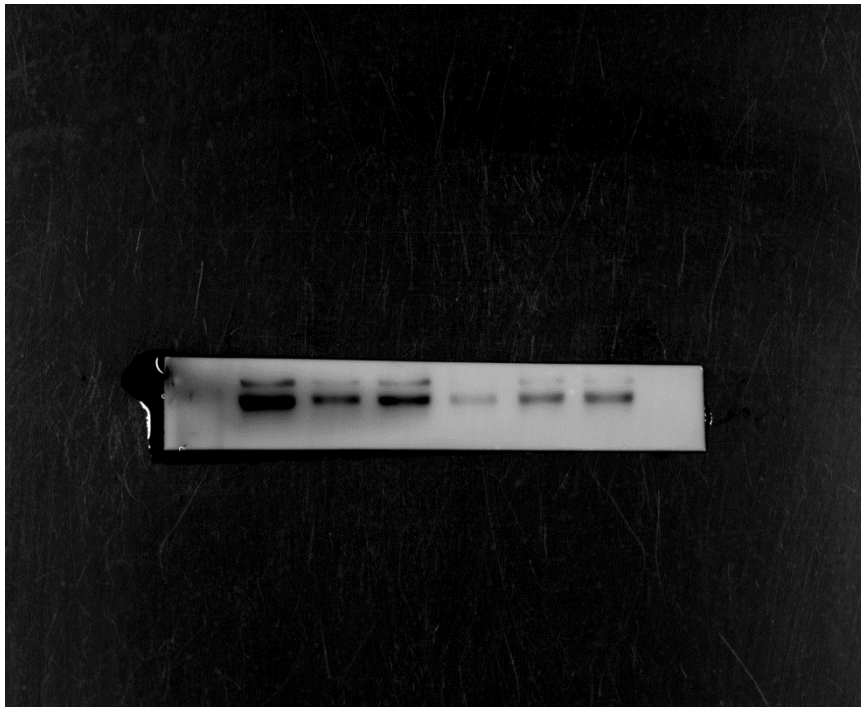

# GPX4

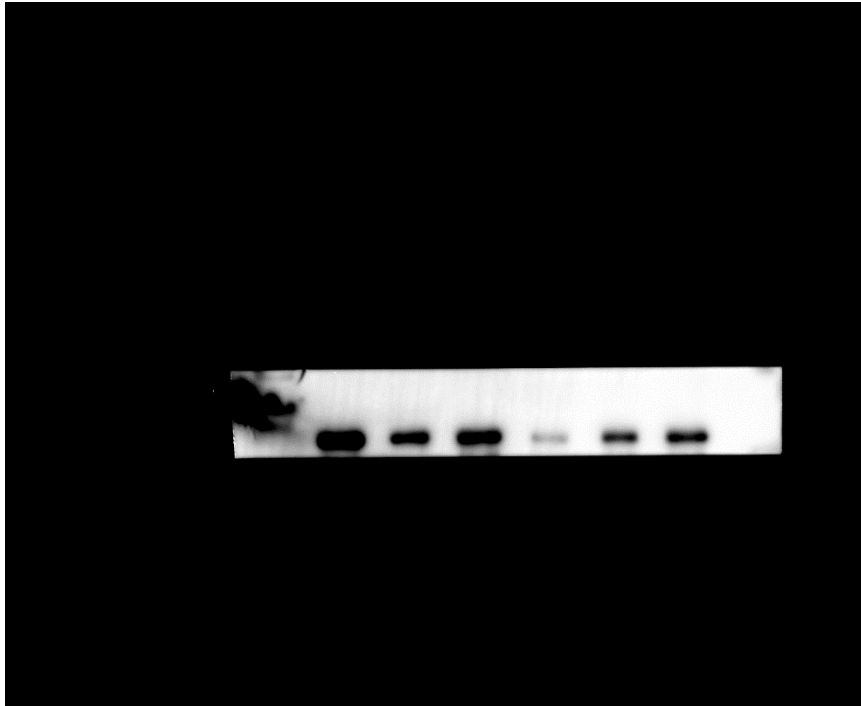

# $\beta$ -ACTIN

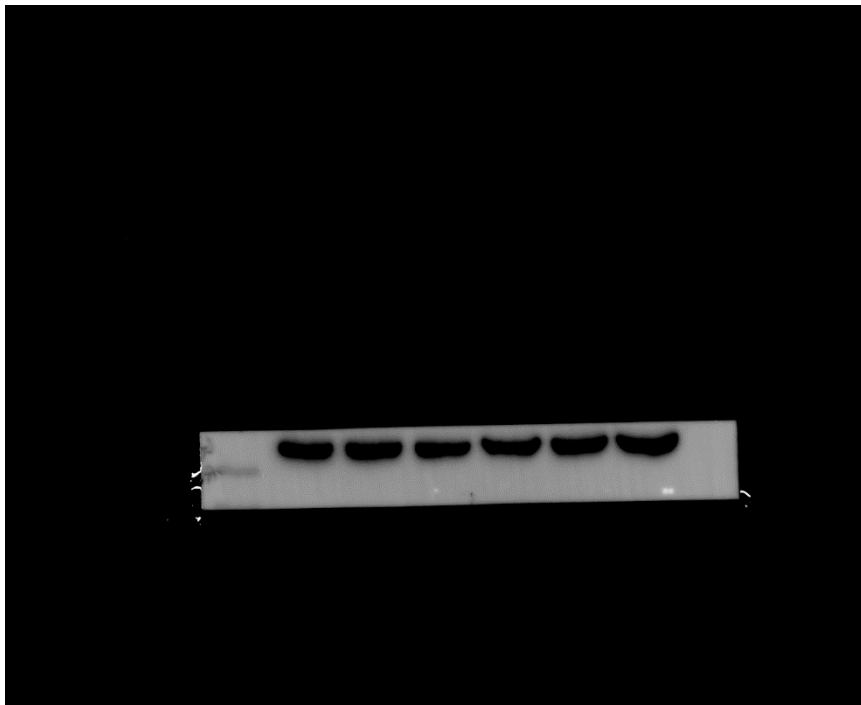

**sWGA**

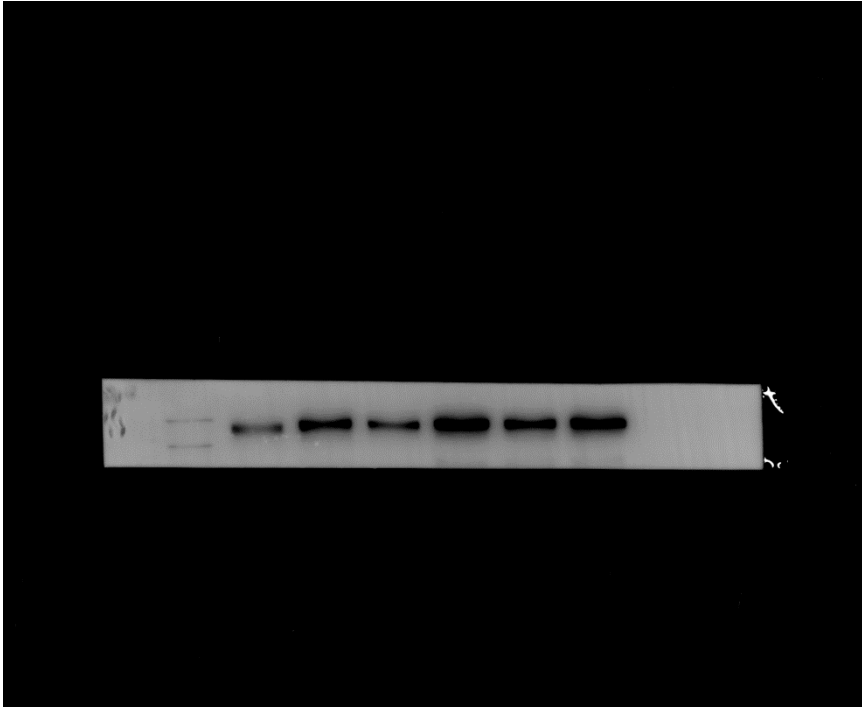

**Input**

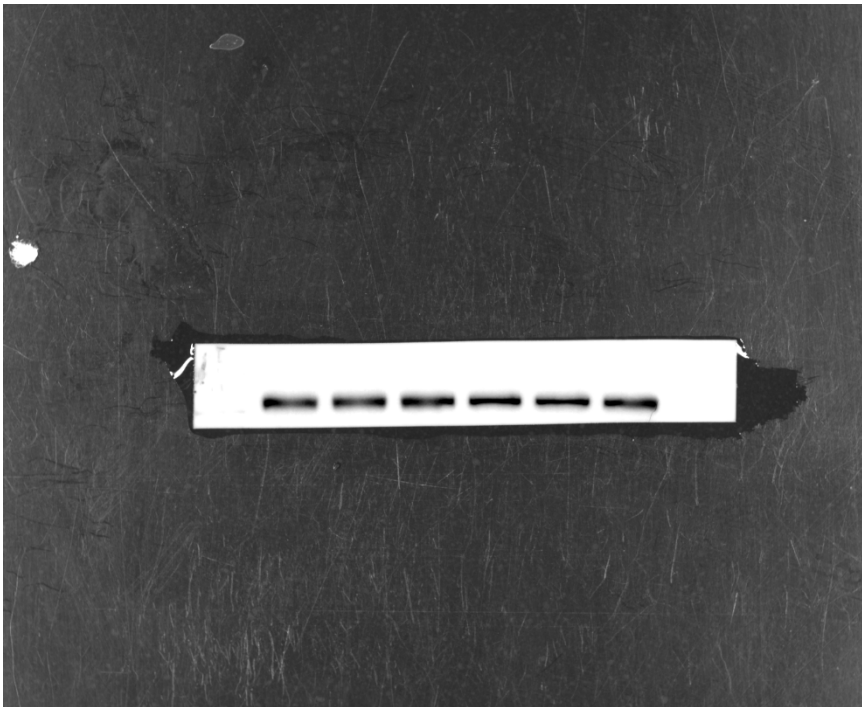

# Supplementary Figure 1A

**CD9**

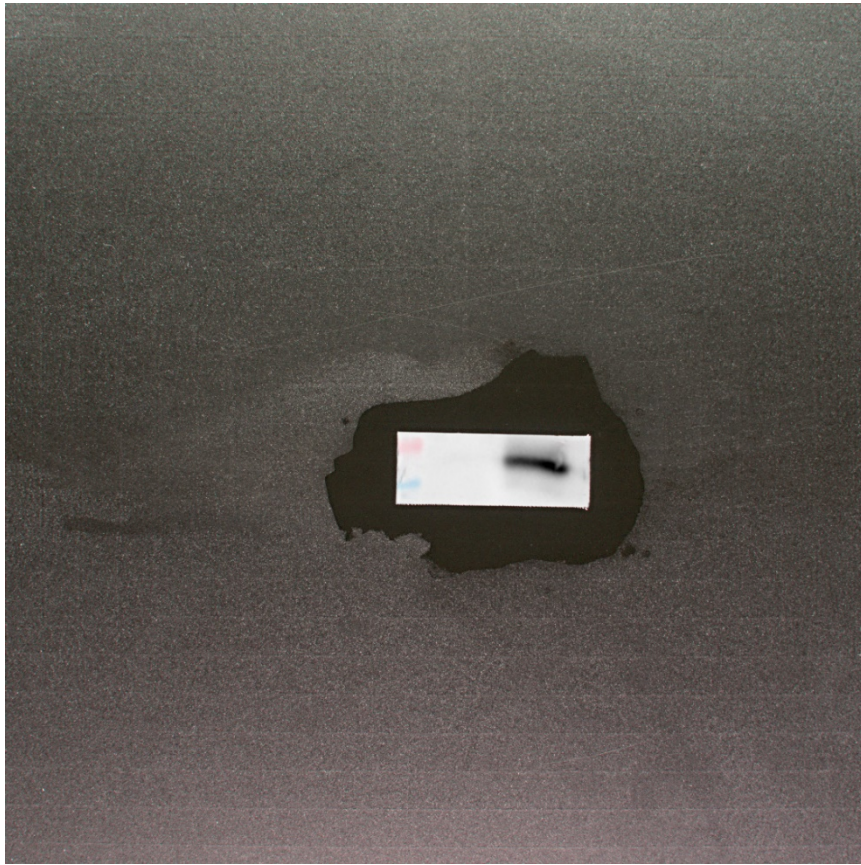

**TSG101**

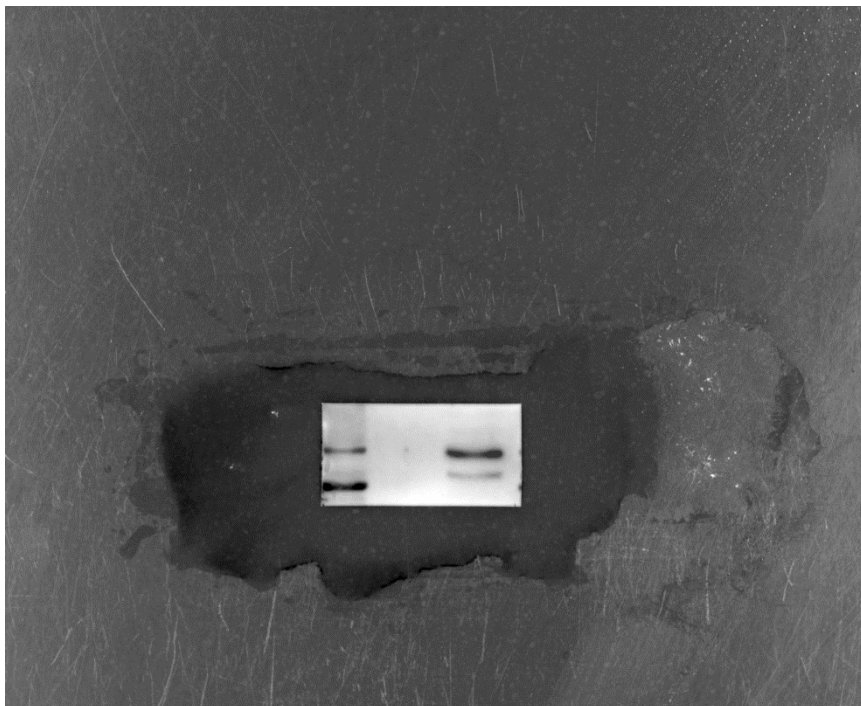

# UMOD

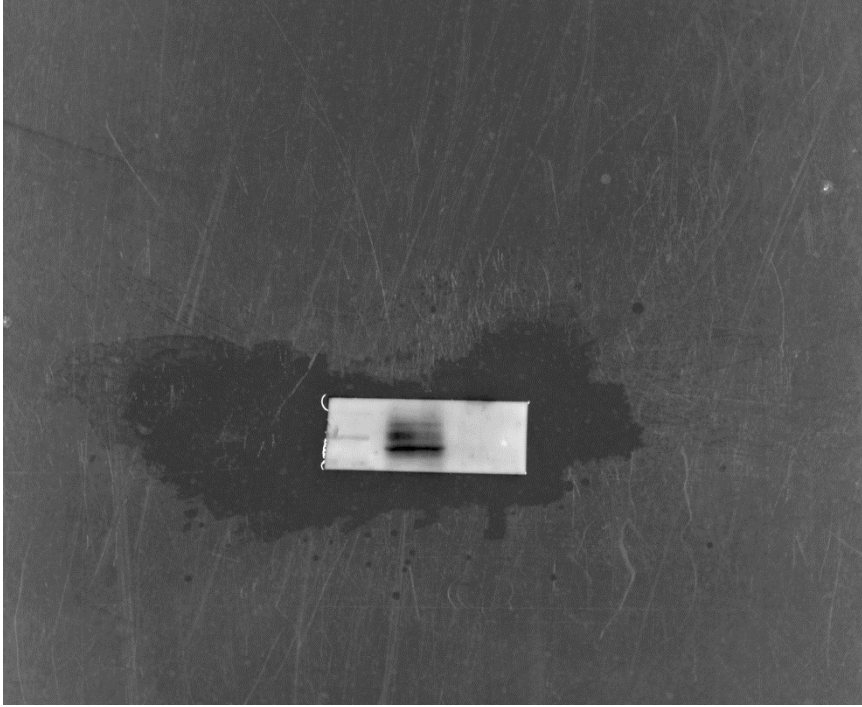

**Supplementary Figure 1J**

**CD9**

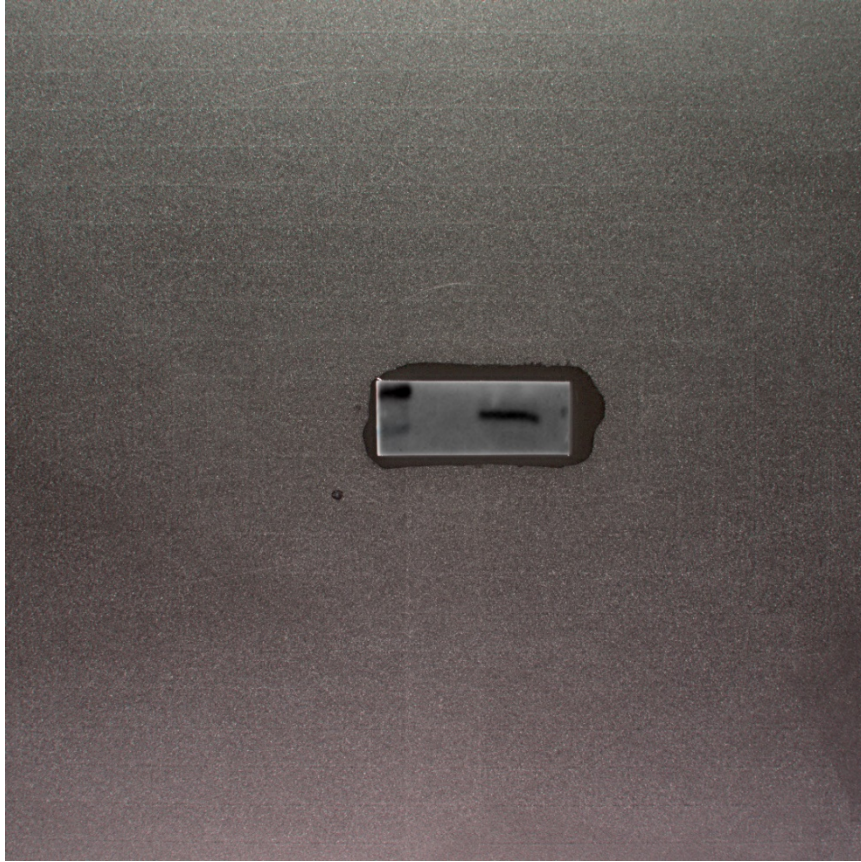

**TSG101**

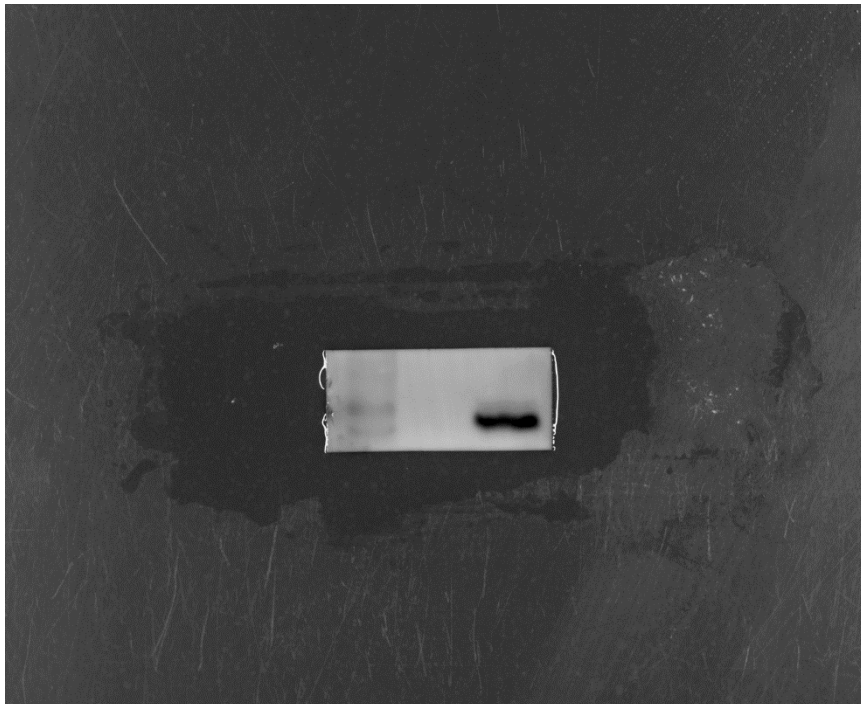

# Calnexin

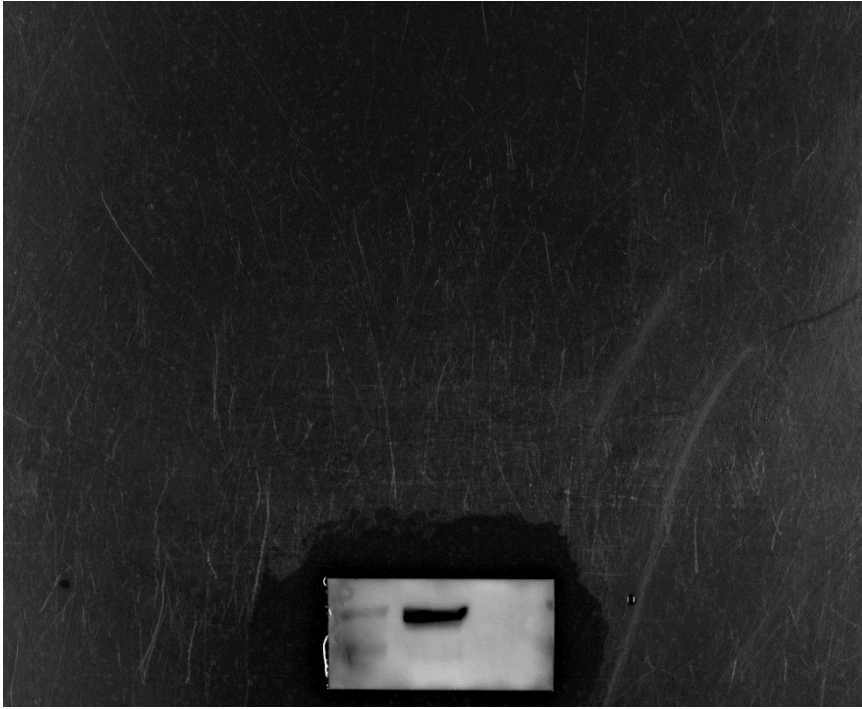

**Supplementary Figure 4D**

**GFPT1**

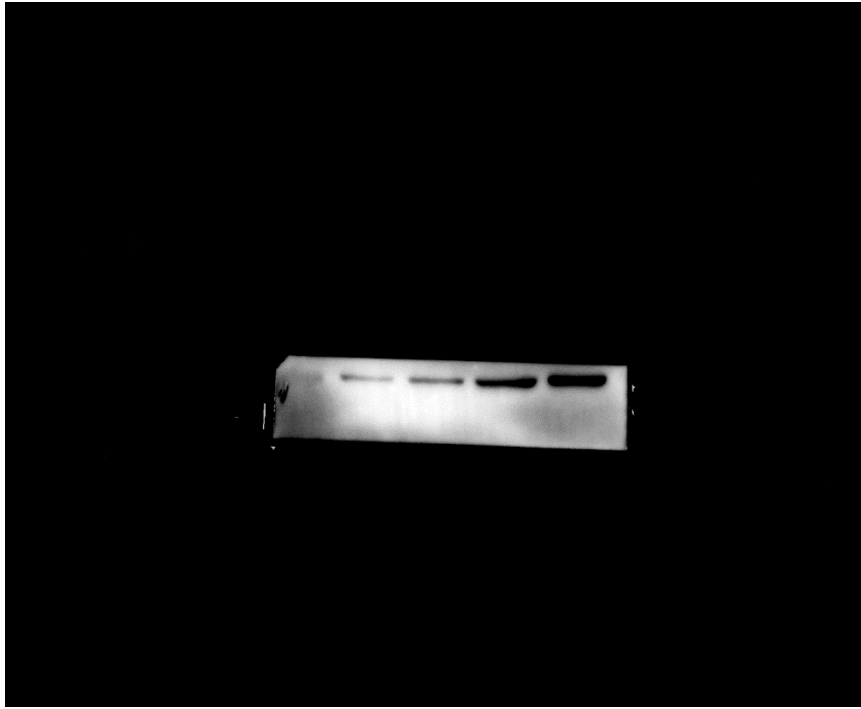

**$\beta$ -ACTIN**

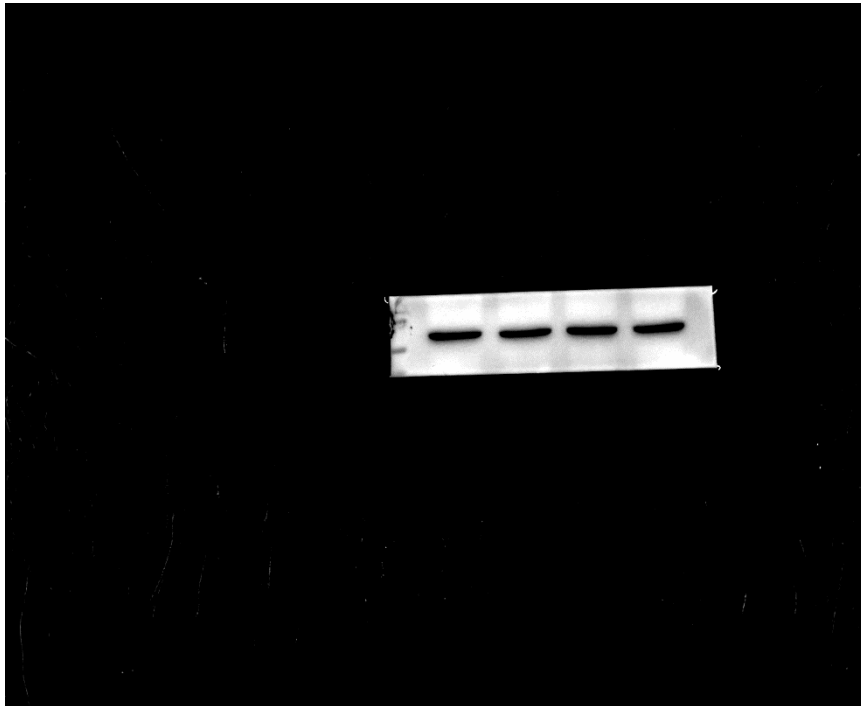



**Supplementary Figure 5E**

**GFPT1**

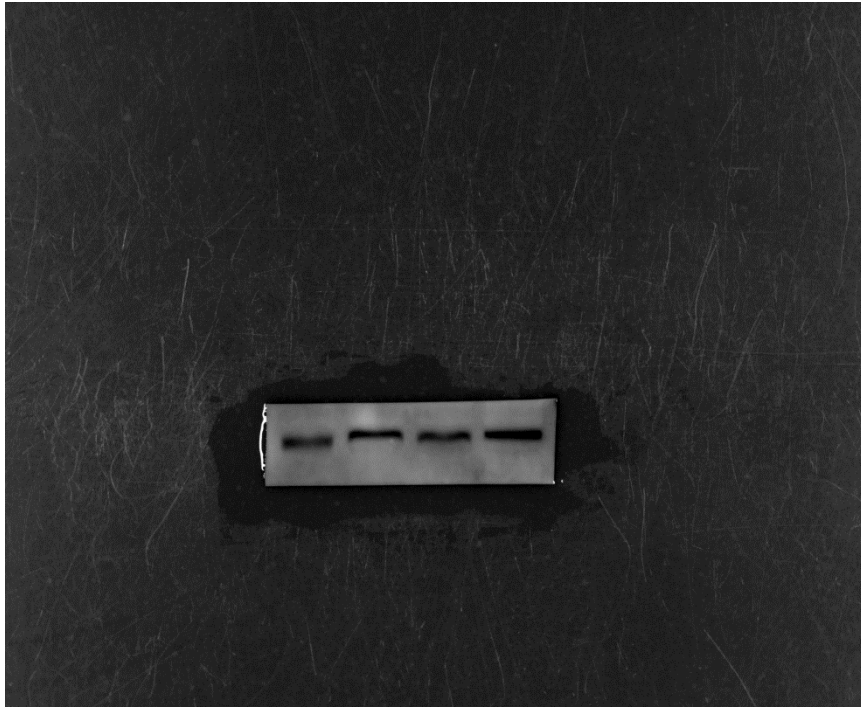

**$\beta$ -ACTIN**

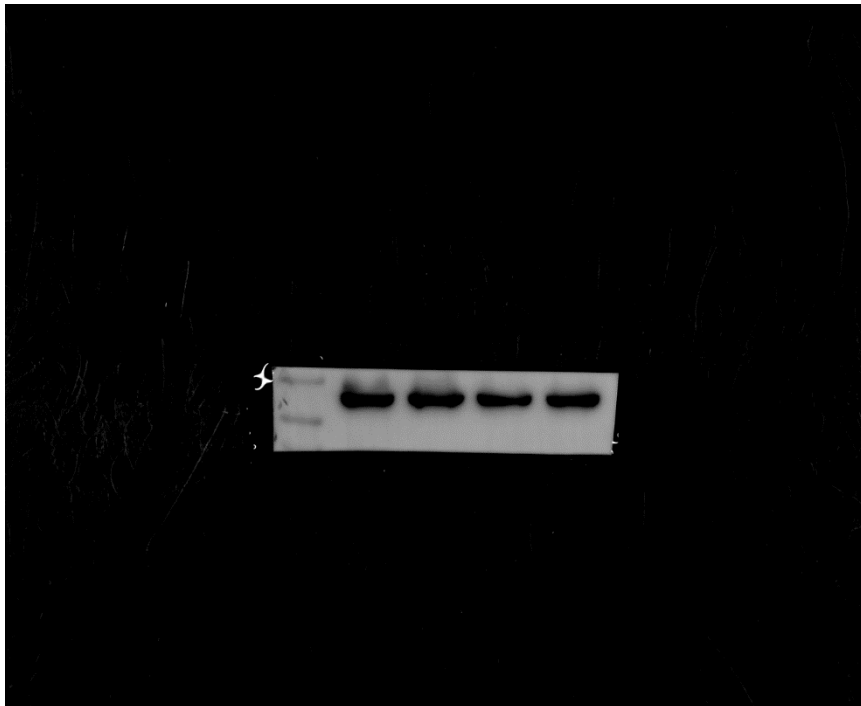

**Supplementary Figure 7C**

**SLC7A11**

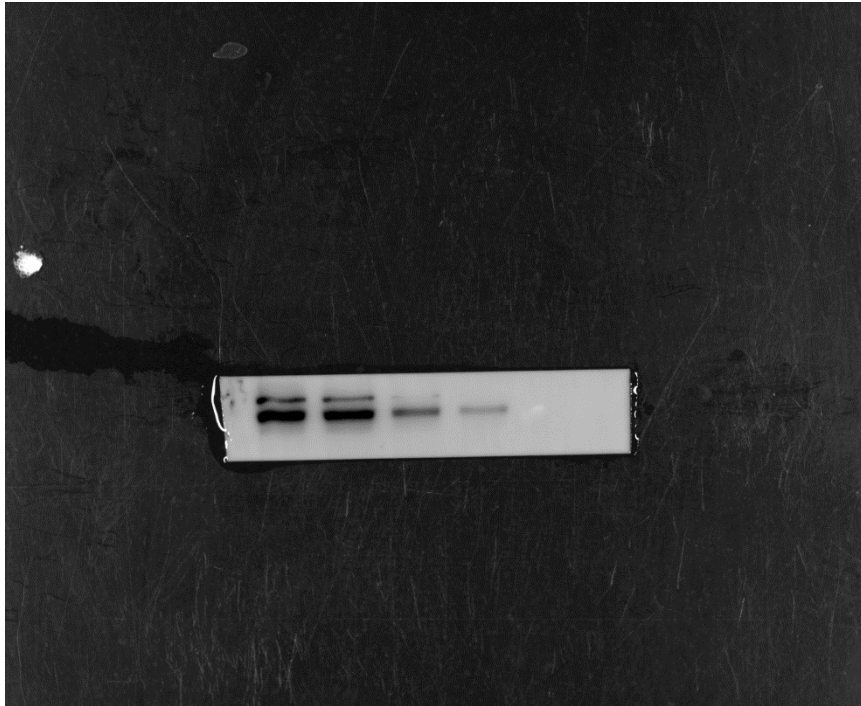

**GPX4**

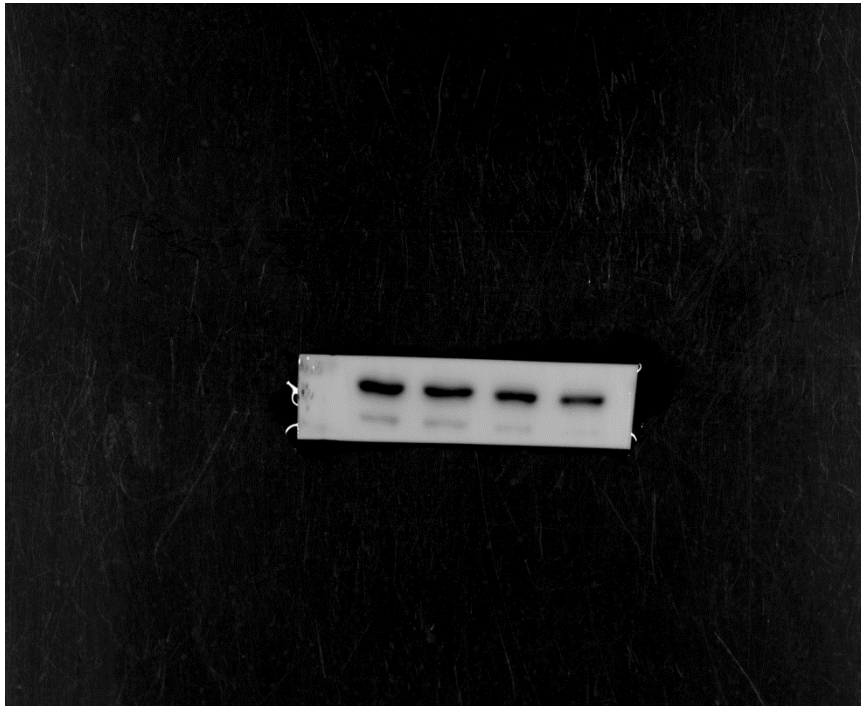

# $\beta$ -ACTIN

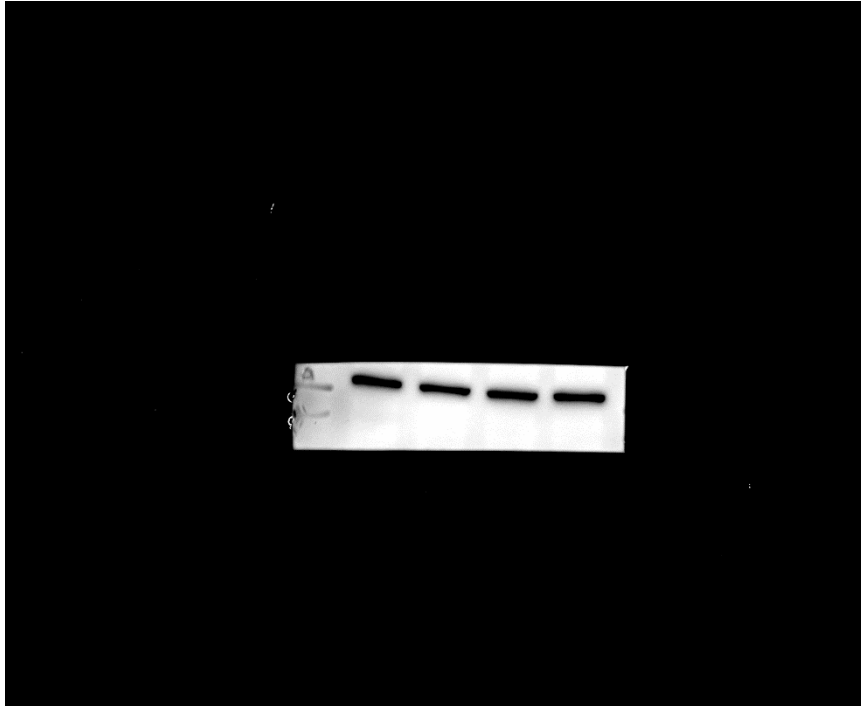

**Supplementary Figure 7F**

**SLC7A11**

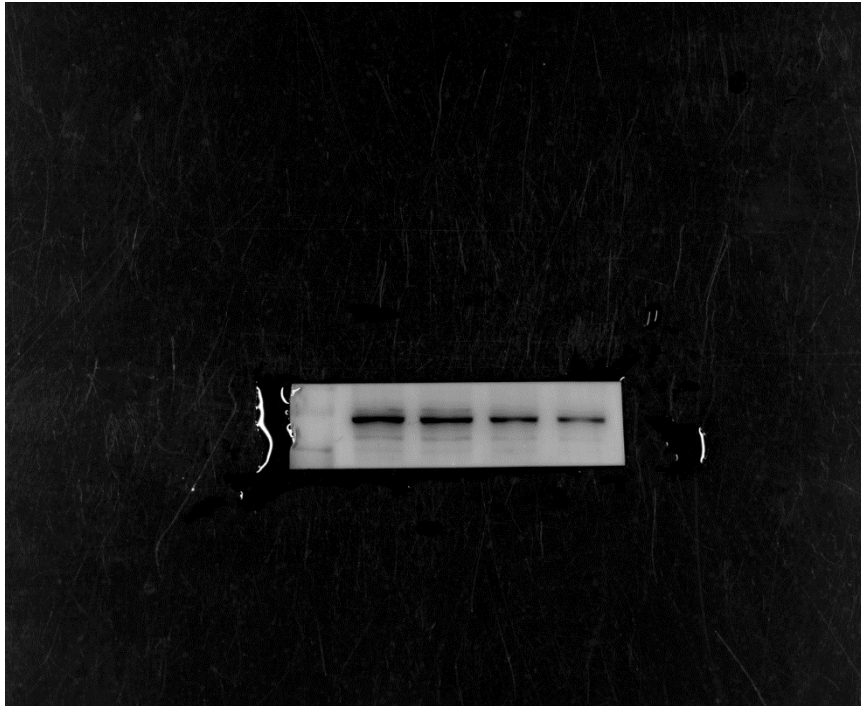

**GPX4**

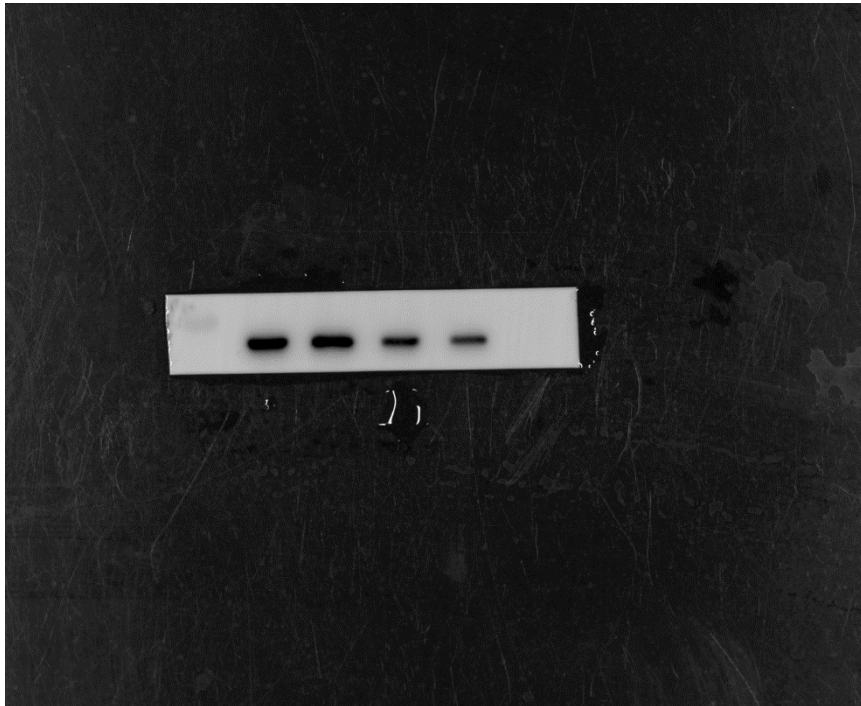

# $\beta$ -ACTIN

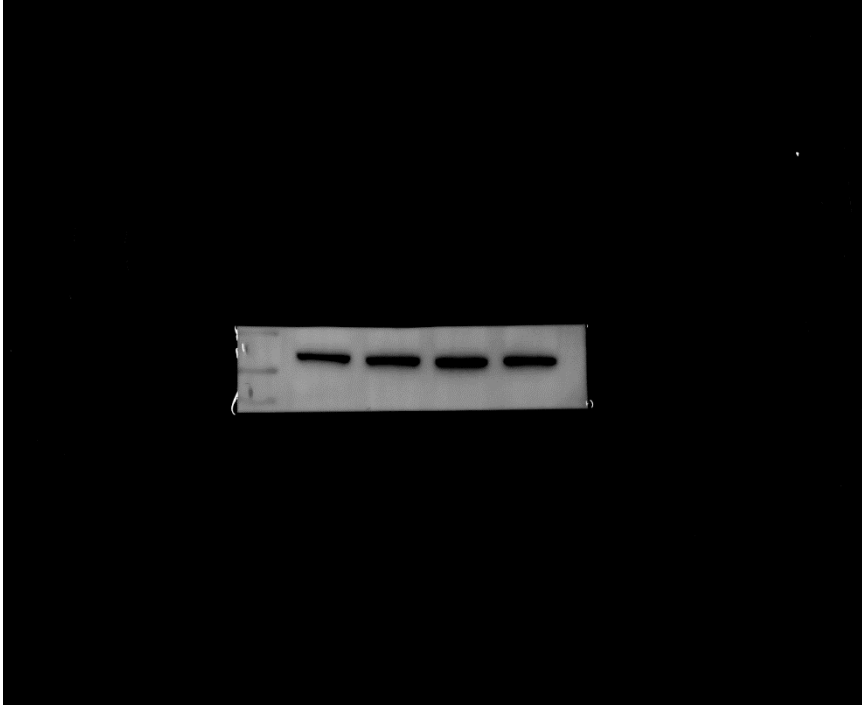

## Supplementary Figure 8B

### IP-HA

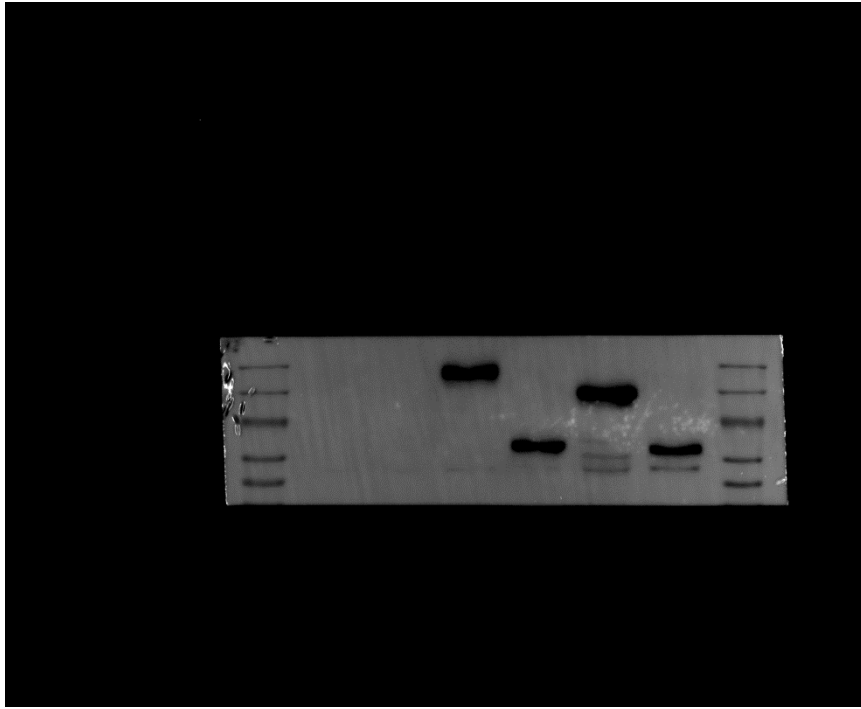

### IP-Flag

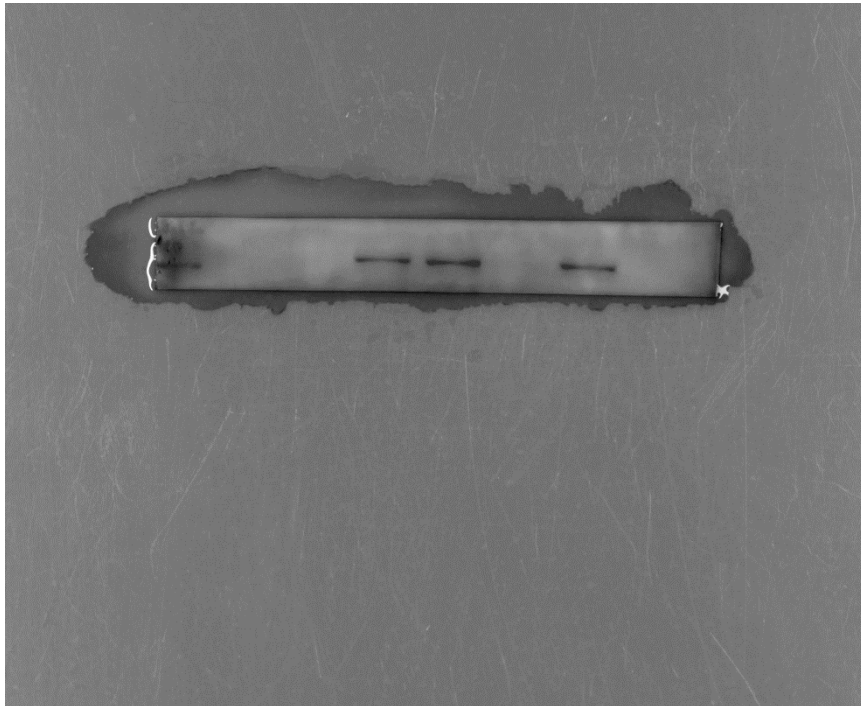

## Input-HA

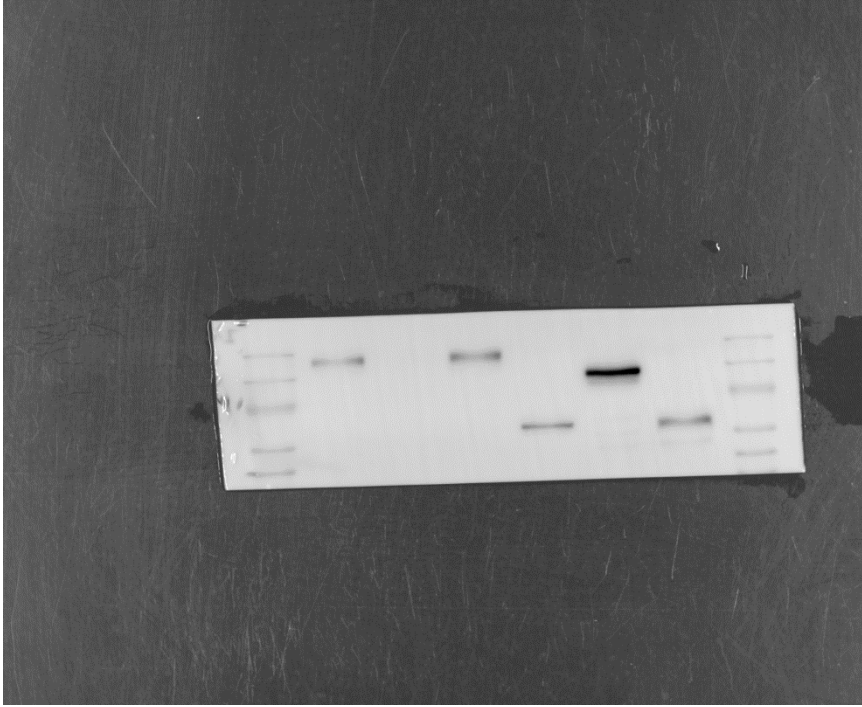

## Input-Flag

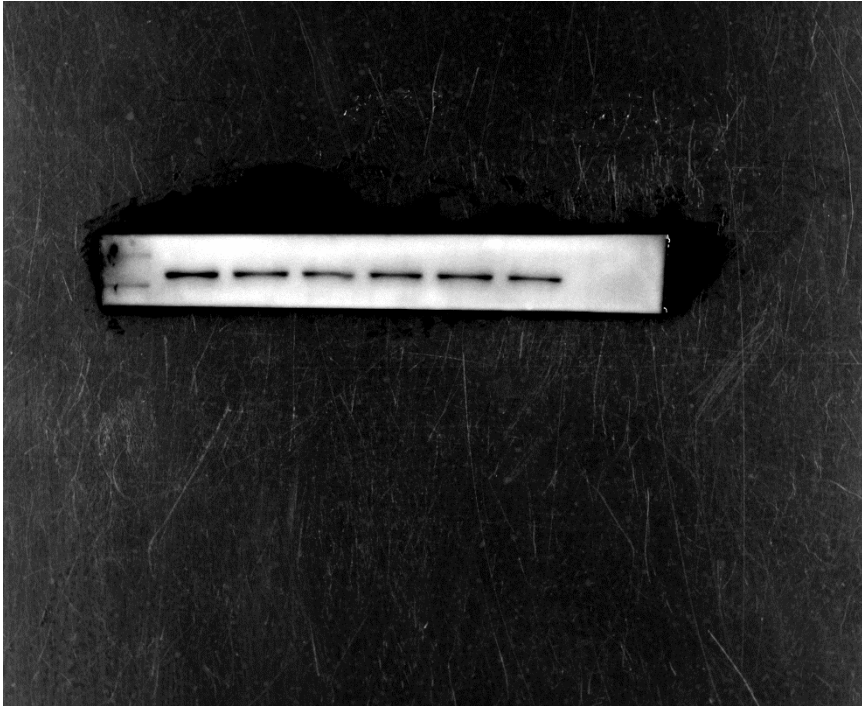

# Supplementary Figure 8C

## sWGA

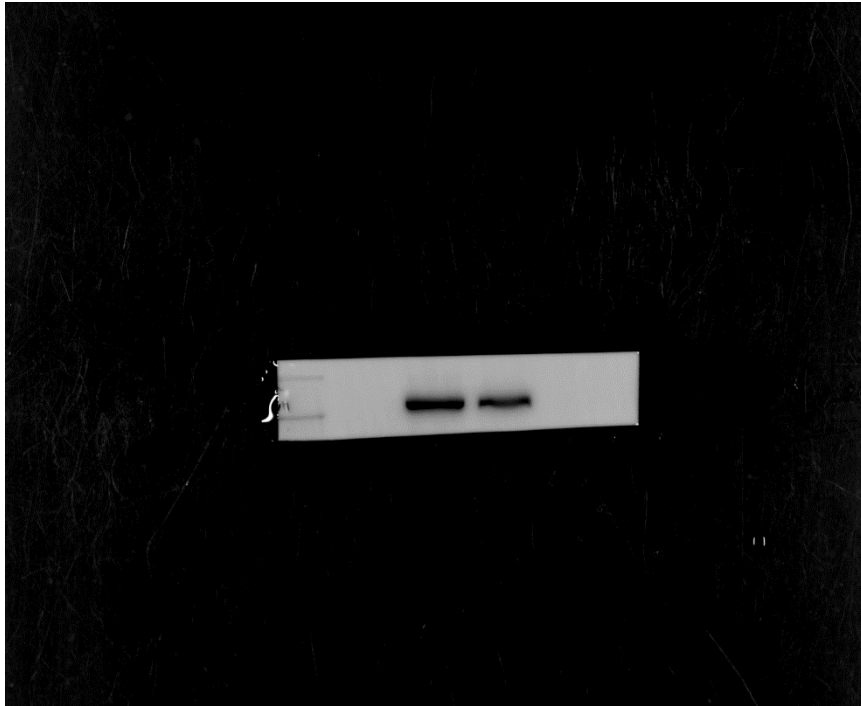

**Input**

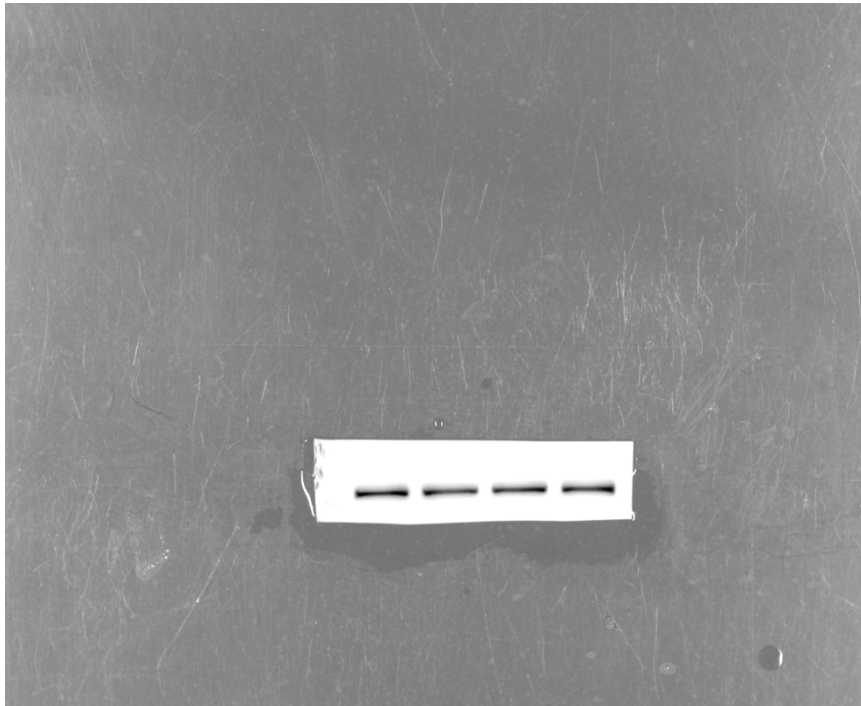



## Supplementary Figure 8D

O-GlcNAc

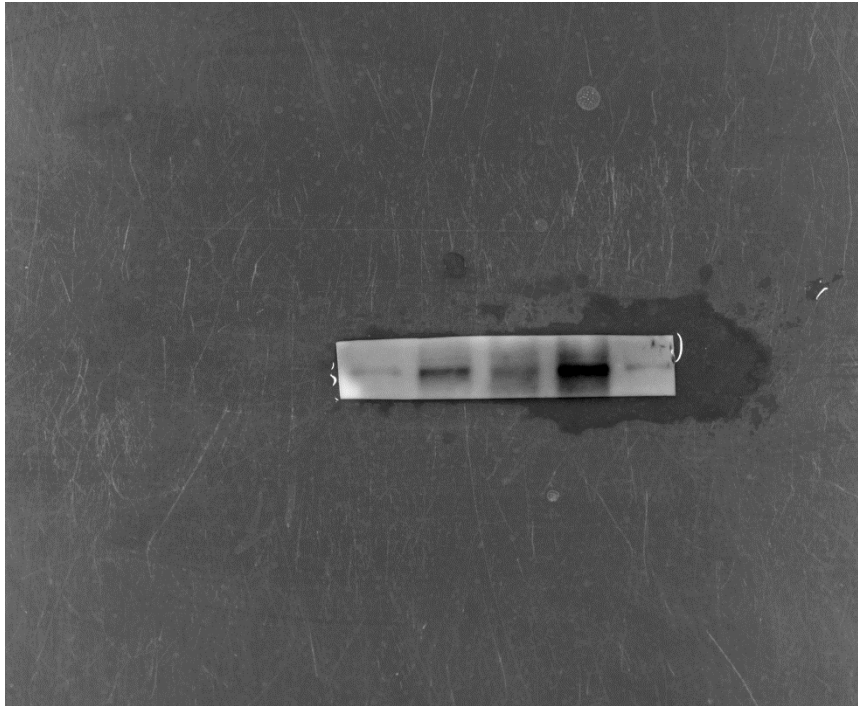

IP-HA

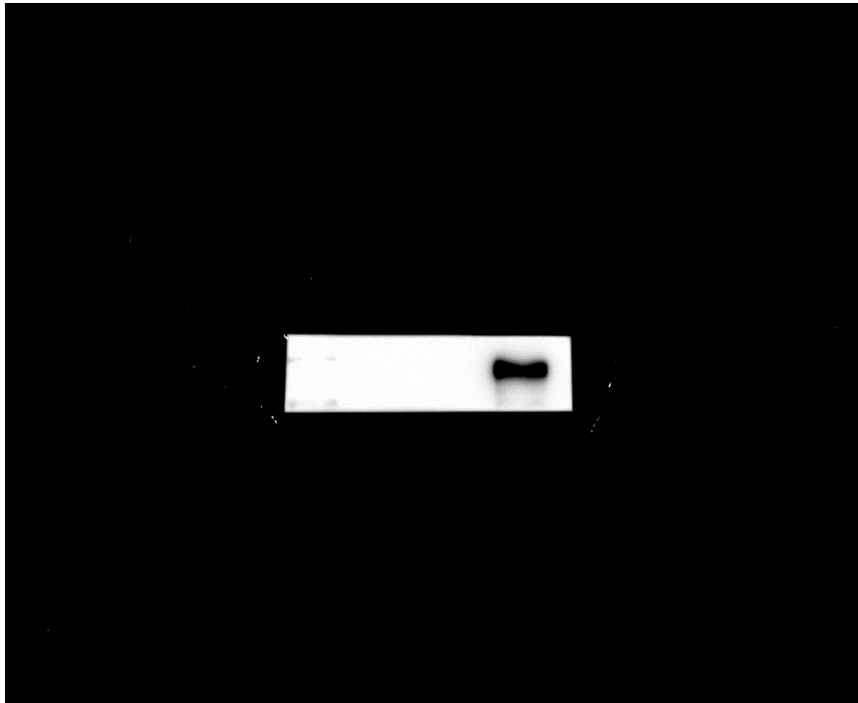

## Input-HA

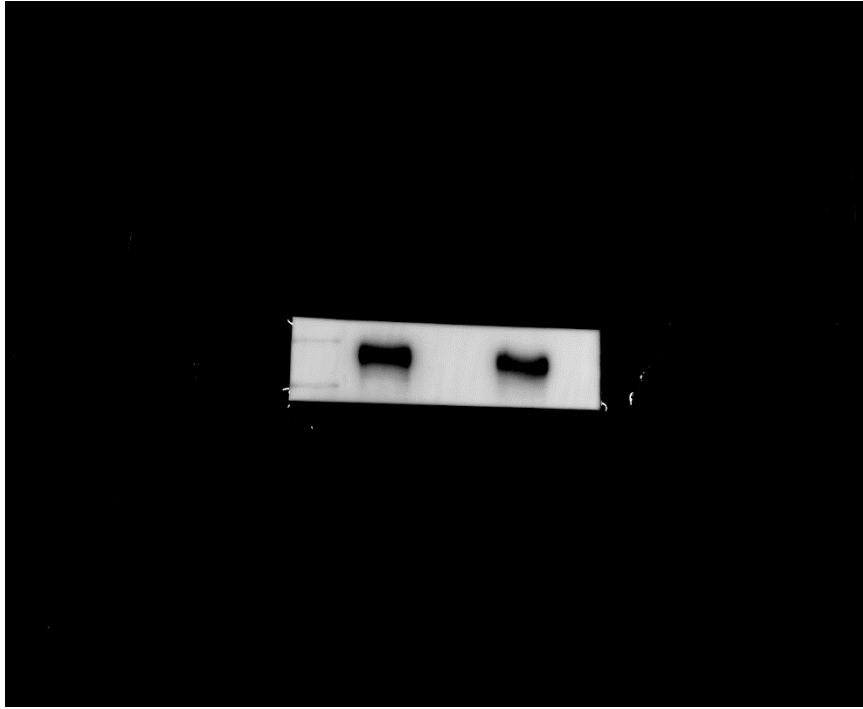

## Supplementary Figure 8E

O-GlcNAc

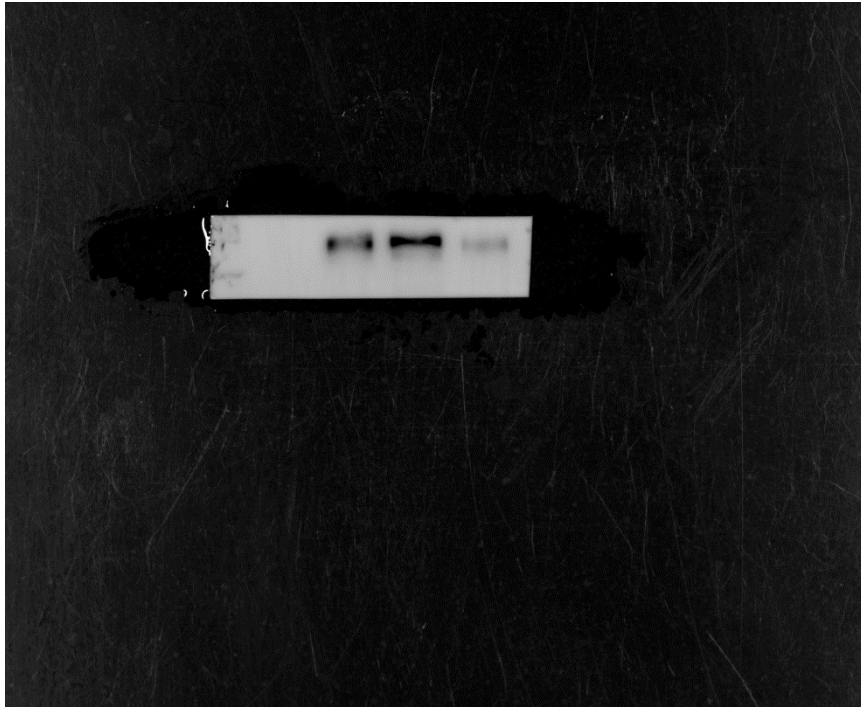

IP-HA

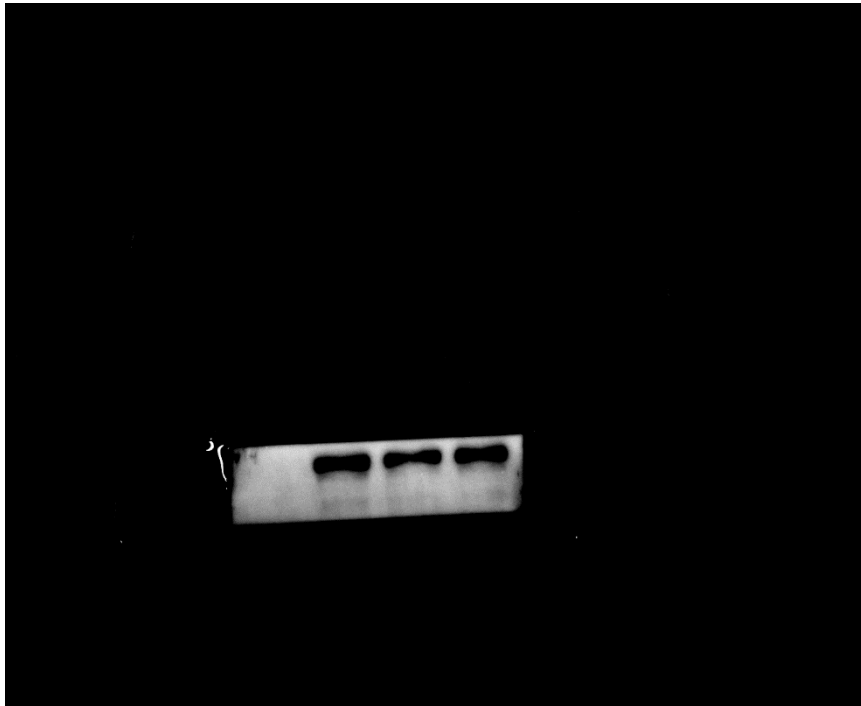

## Input-HA

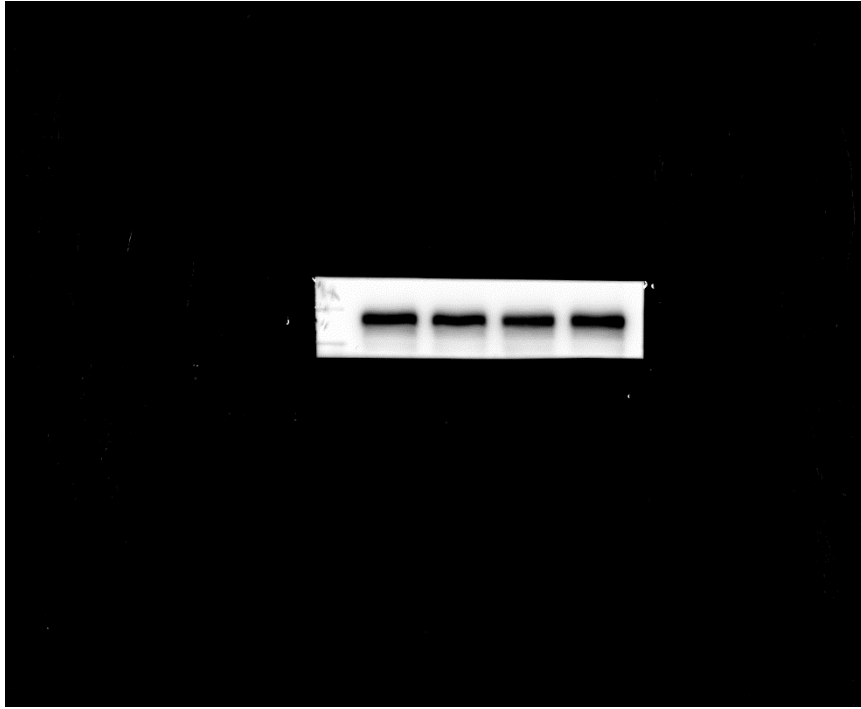

**Supplementary Figure 8F**

**O-GlcNAc**

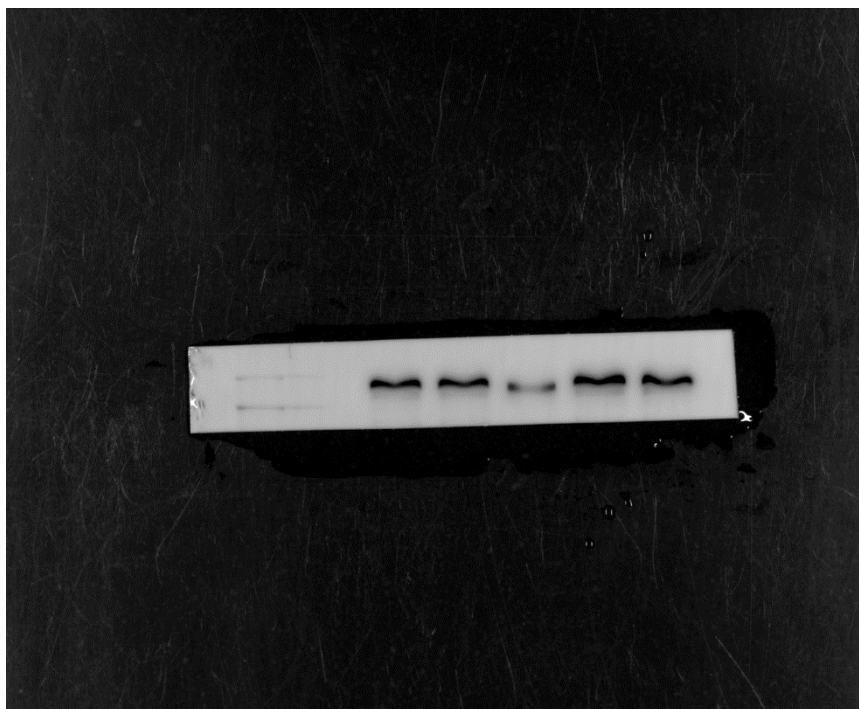

**IP-HA**

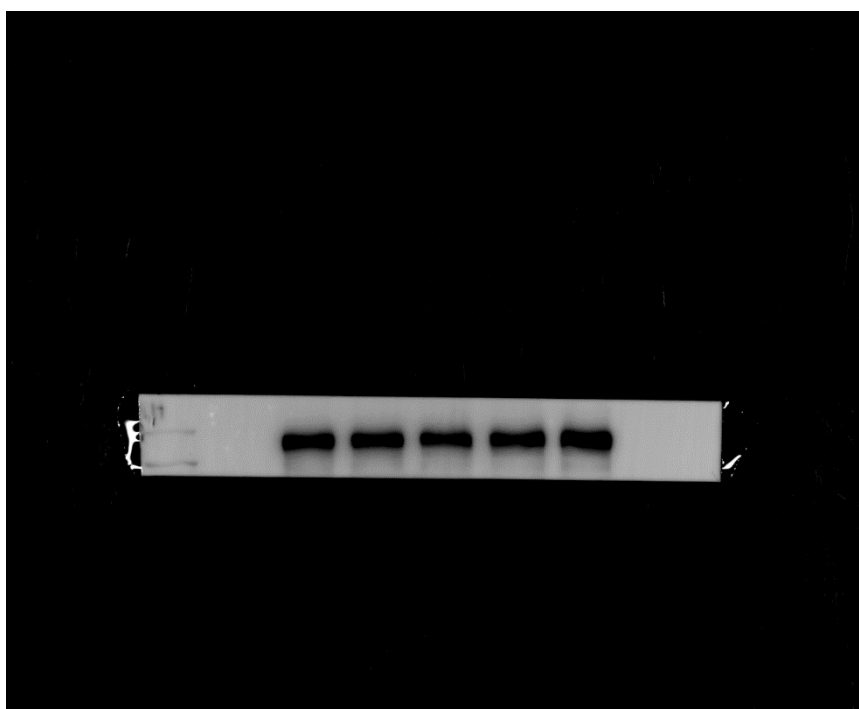

## Input-HA

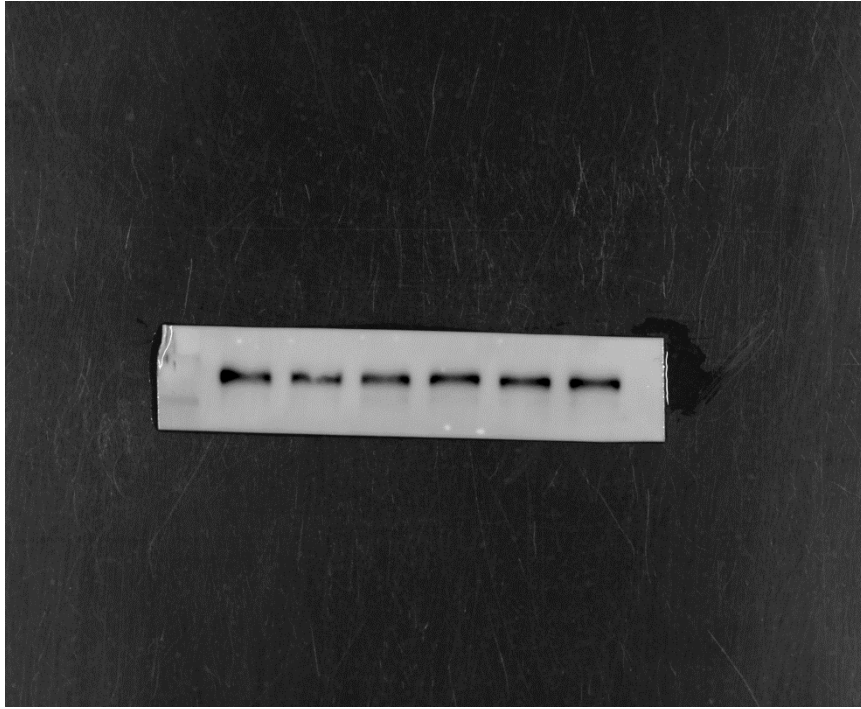

**Supplementary Figure 9A**

**BACH2**

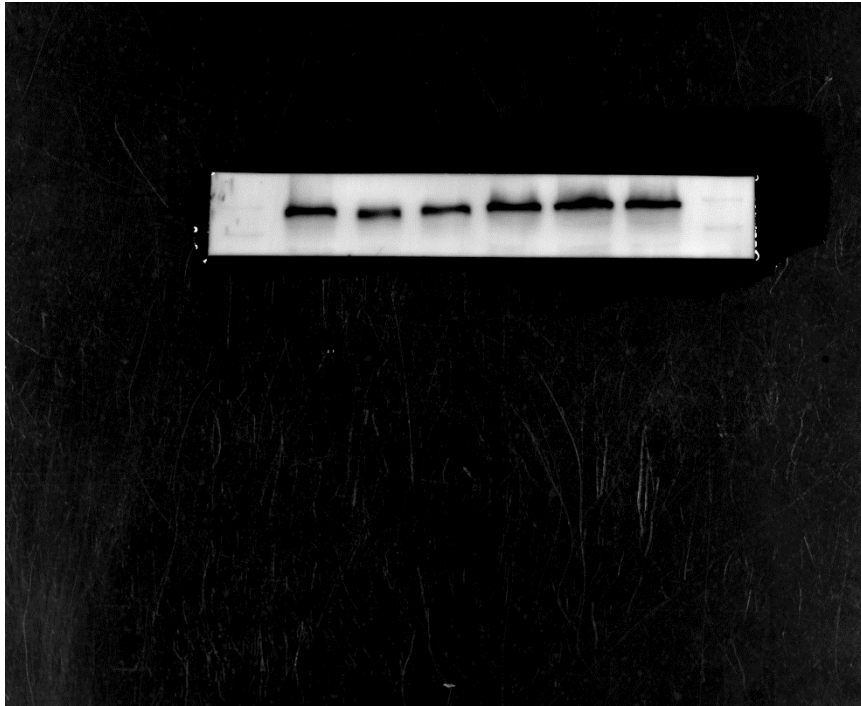

**PCNA**

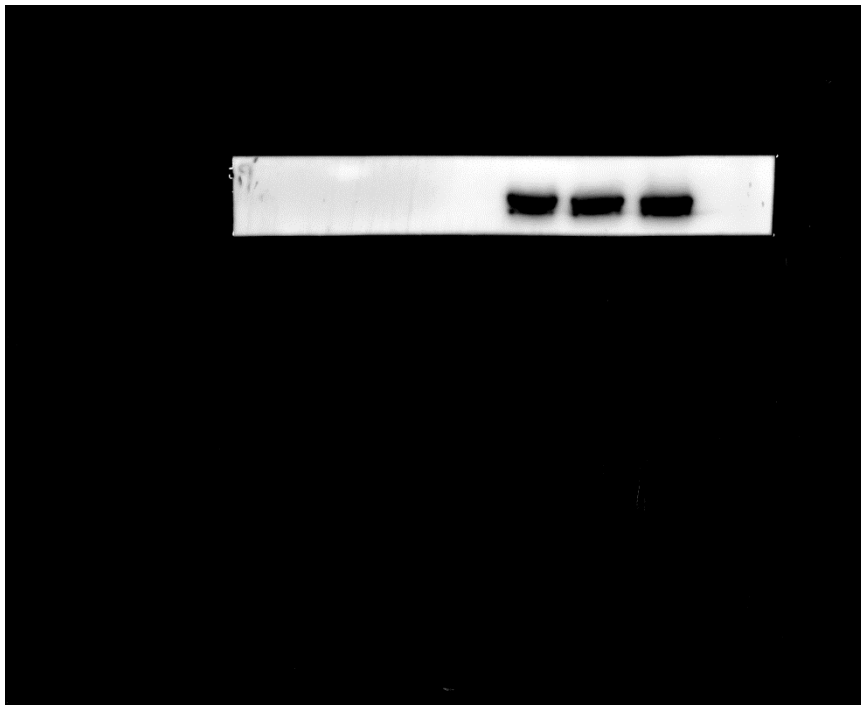

# GAPDH

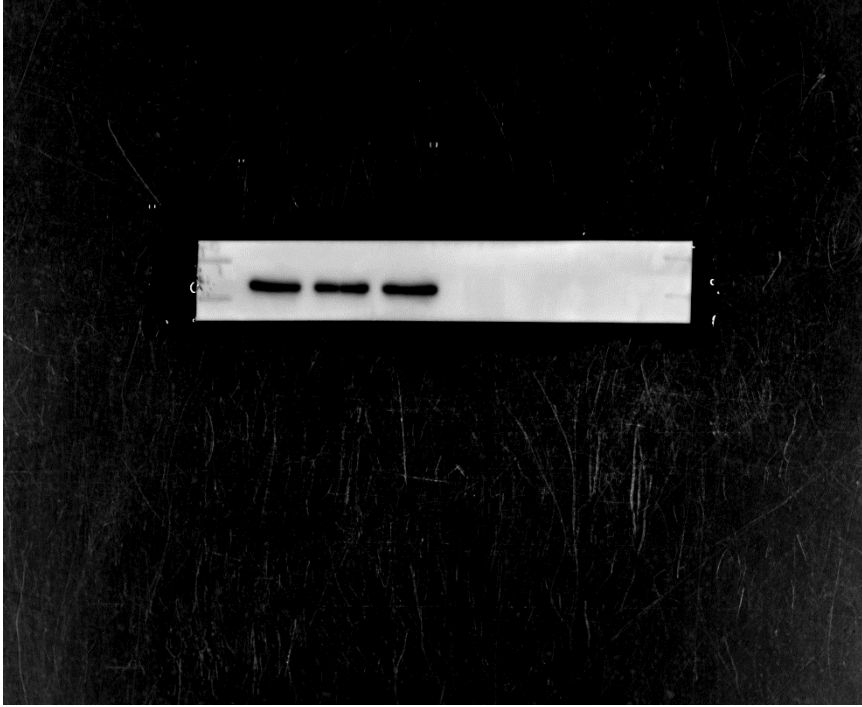



## Supplementary Figure 9B

IP-HA

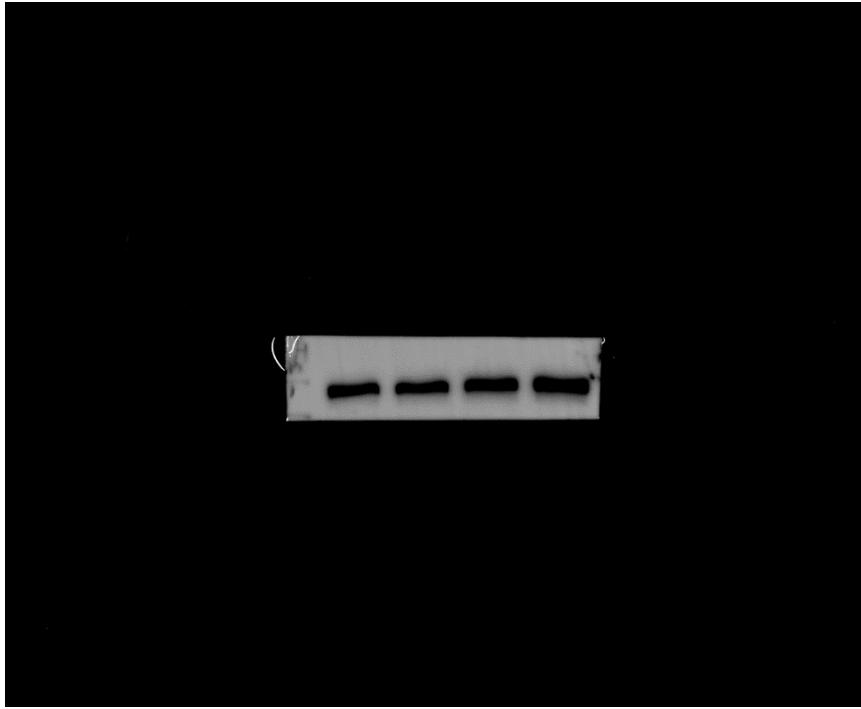

IP-Flag

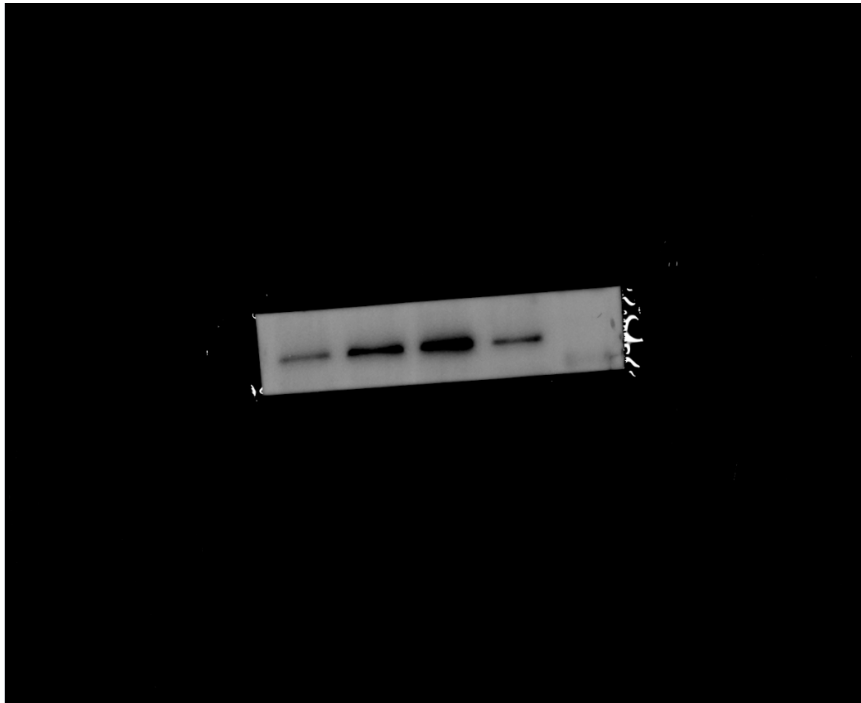

## Input-HA

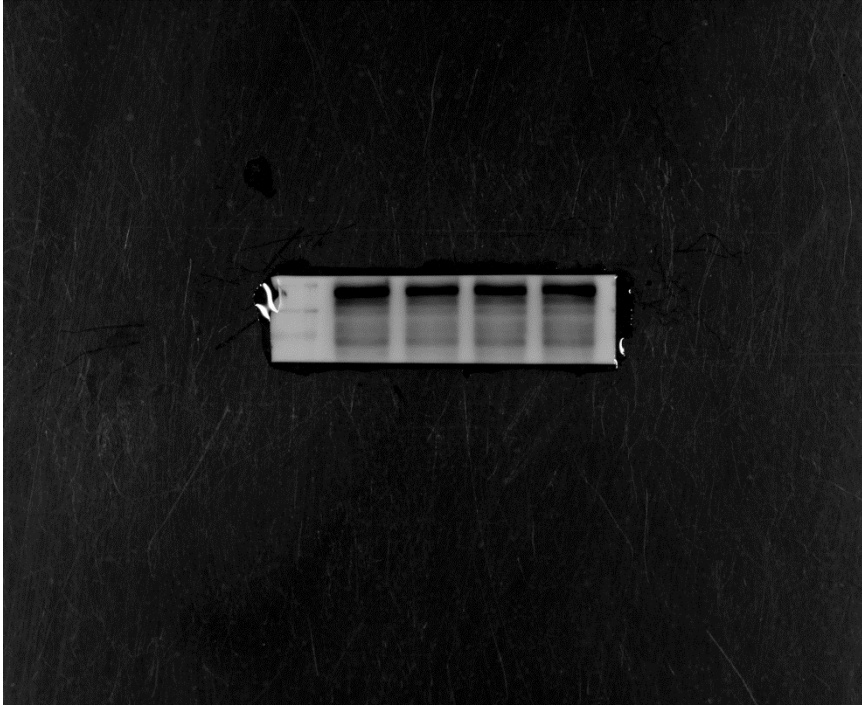

## Input-Flag

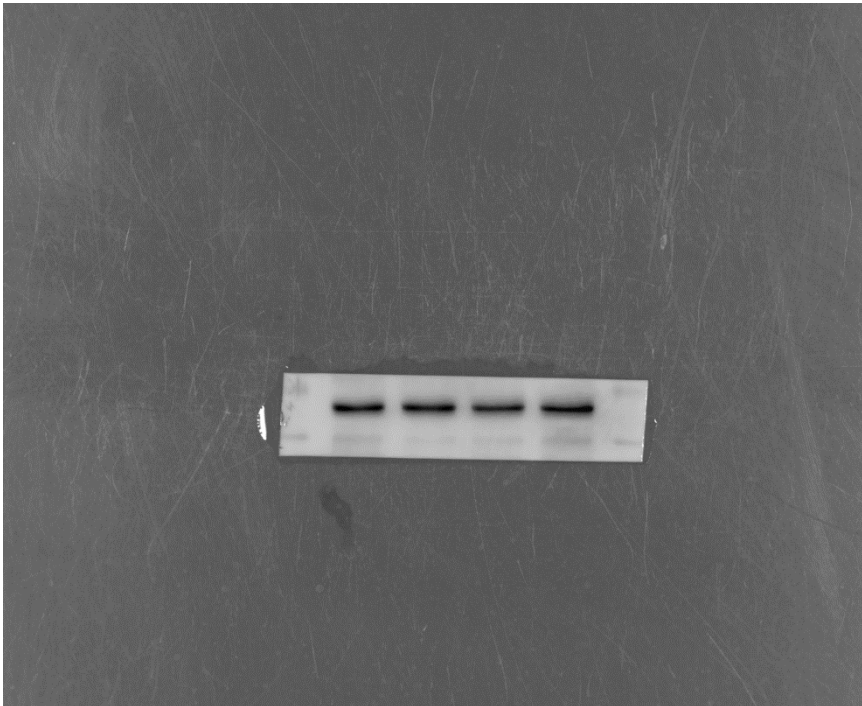

**Supplementary Figure 9C**

**HA**

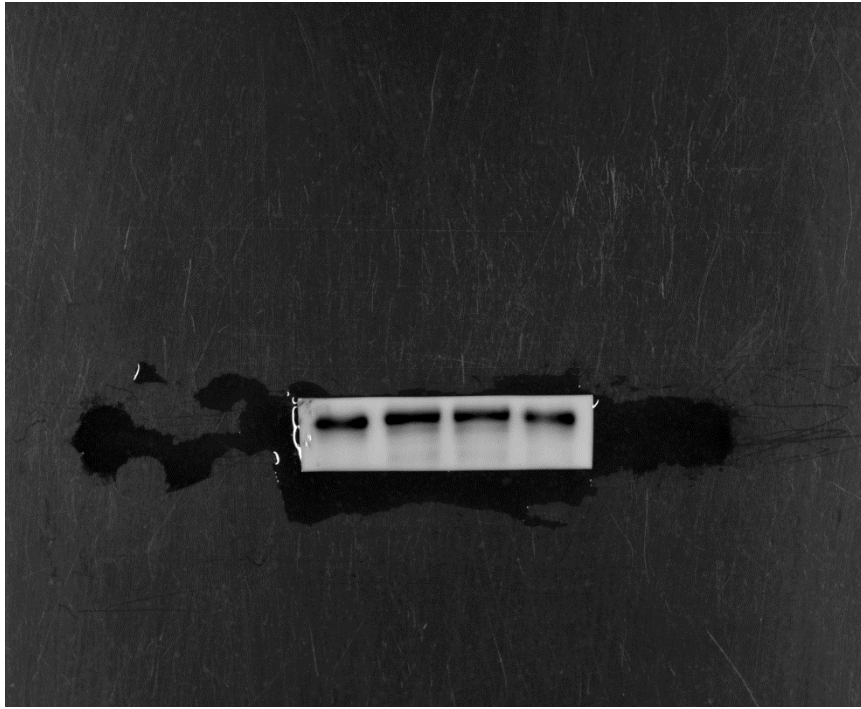

**KPNA1**

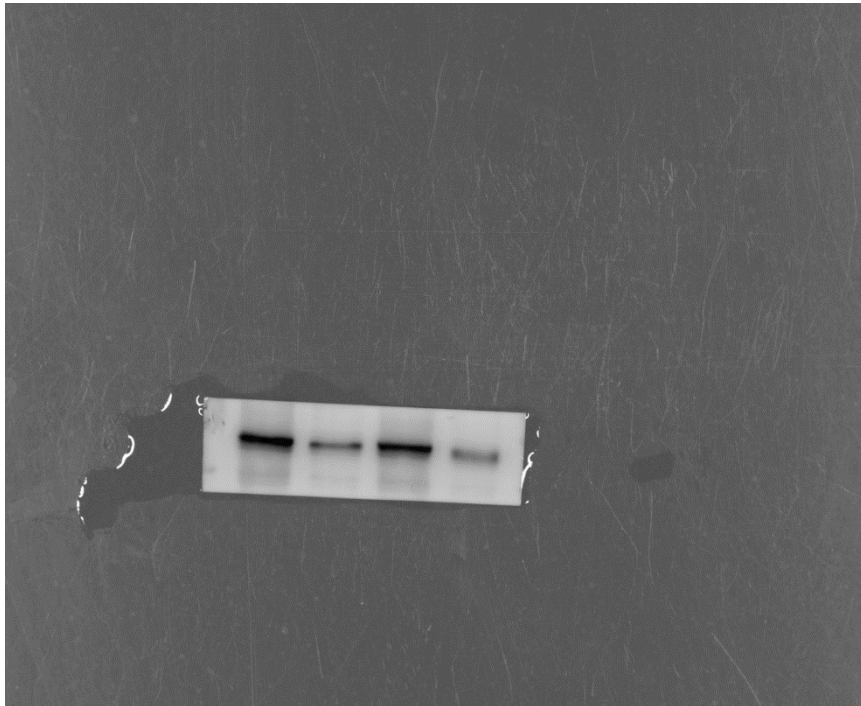

# GAPDH

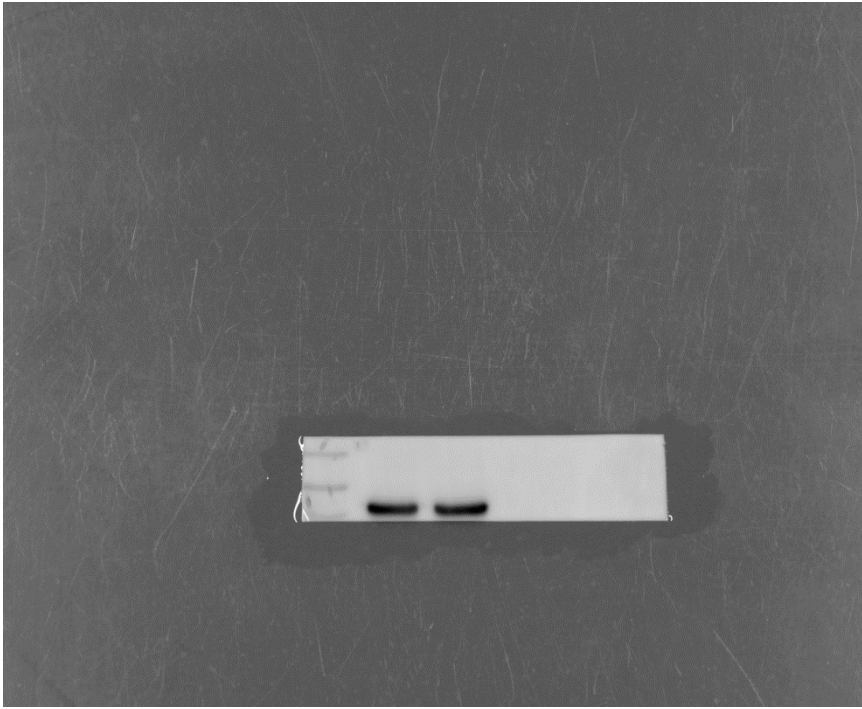

# PCNA

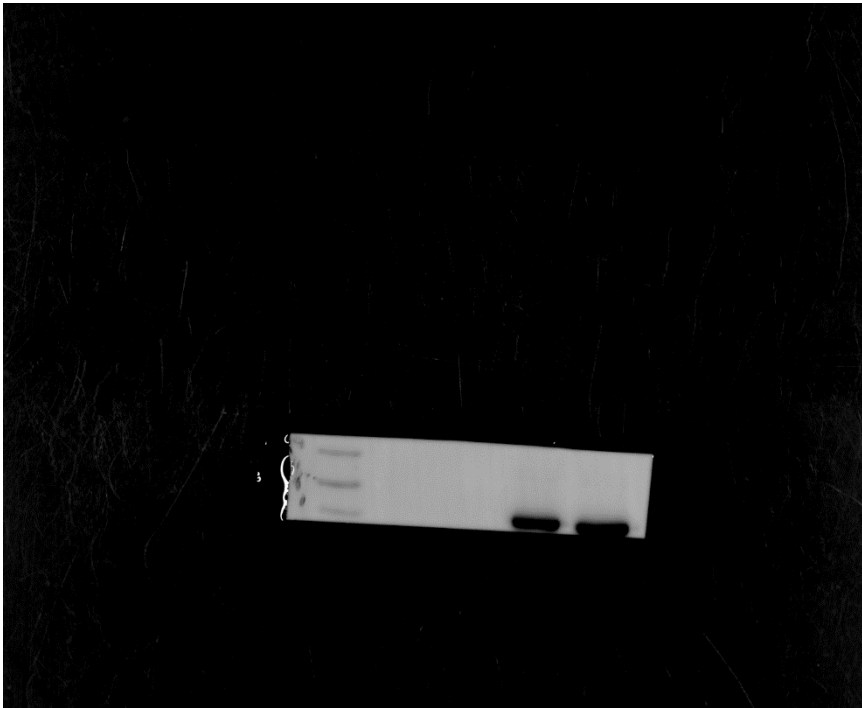

**Supplementary Figure 10H**

**BACH2**

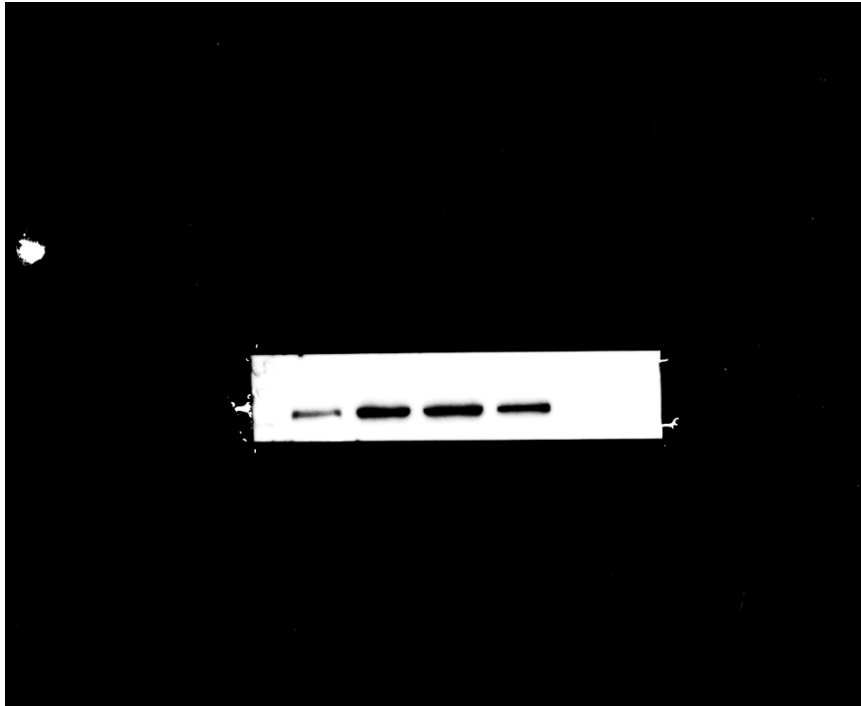

**SLC7A11**

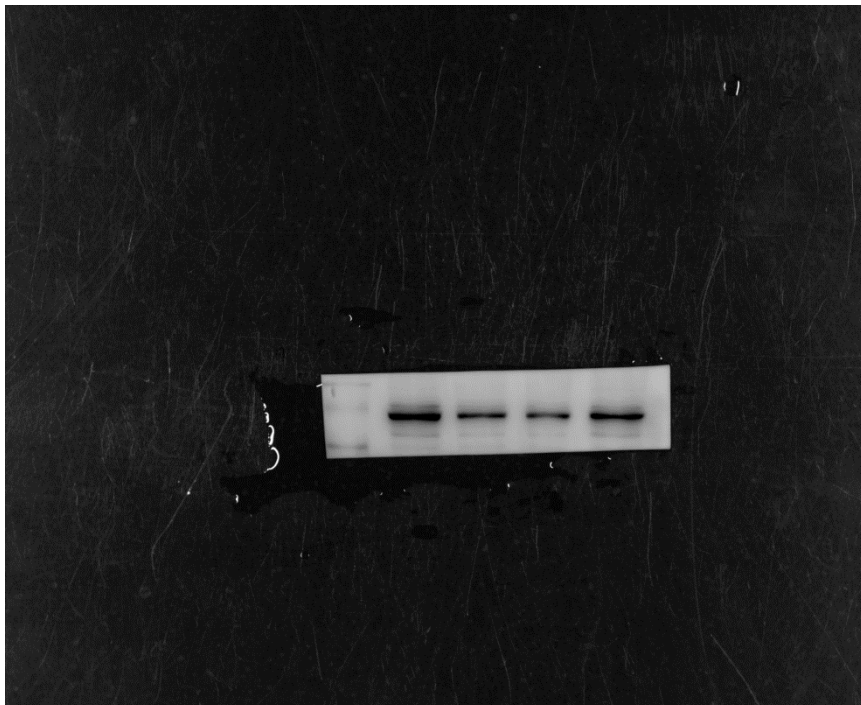

**GPX4**

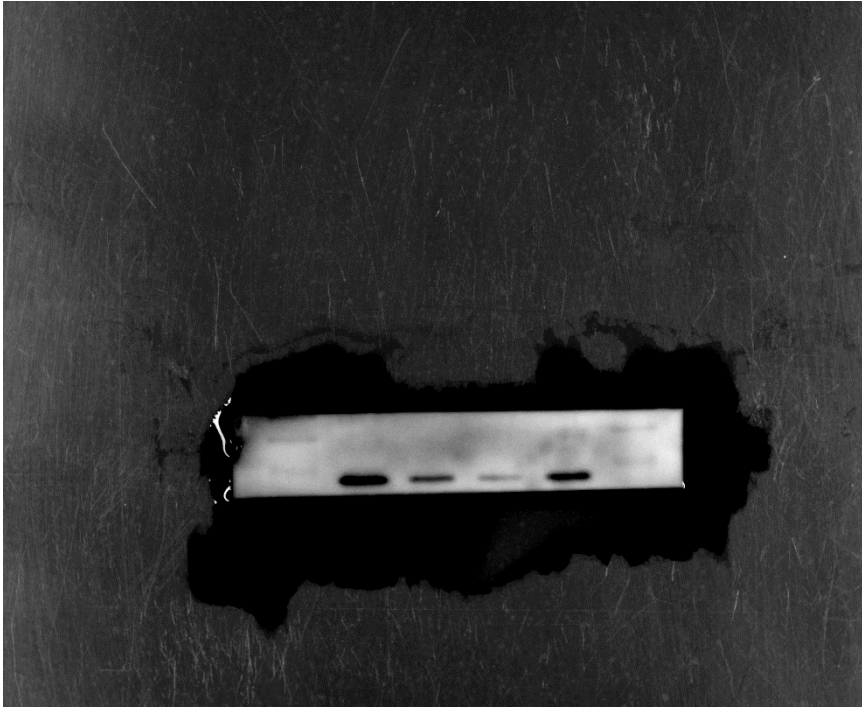

**$\beta$ -ACTIN**

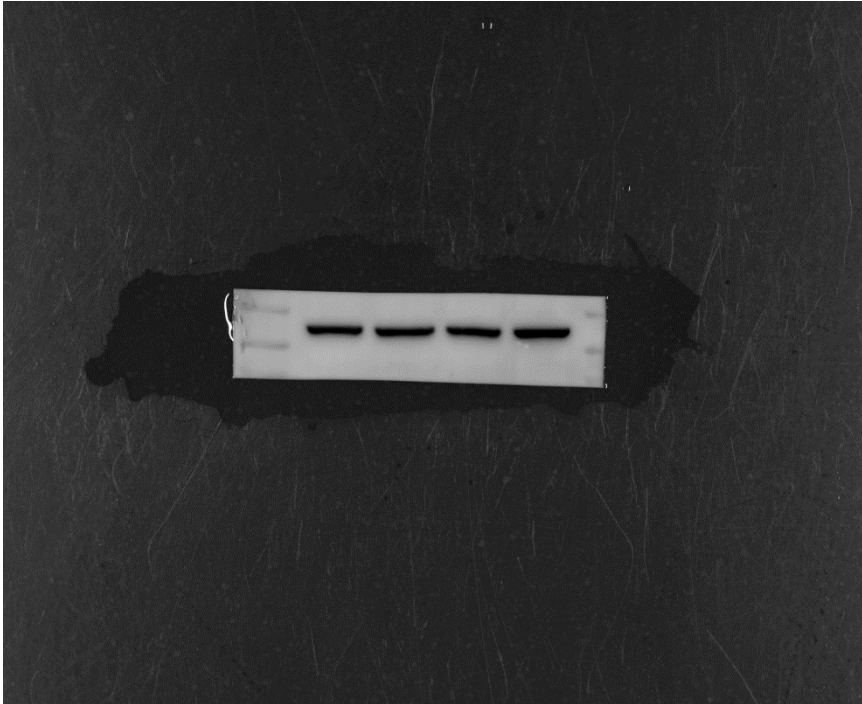

# Supplementary Figure 11G

**CD9**

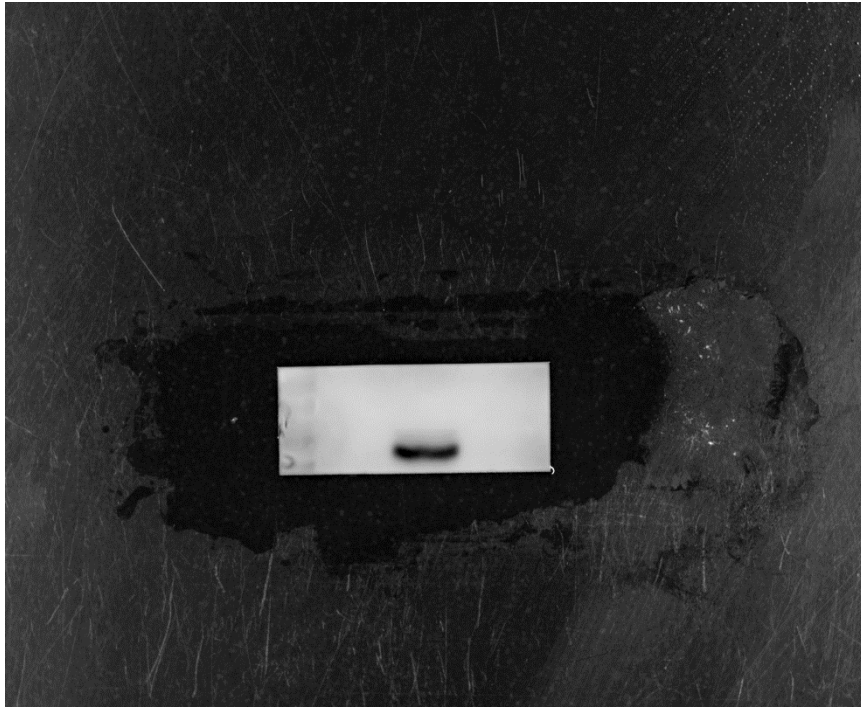

**TSG101**

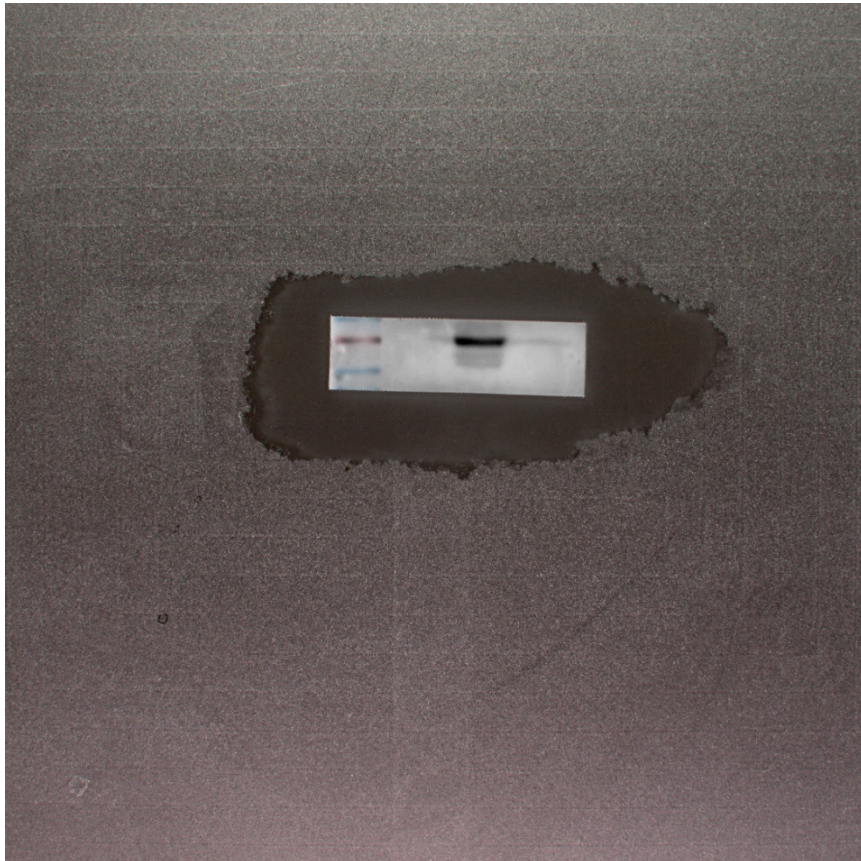

# APOA1

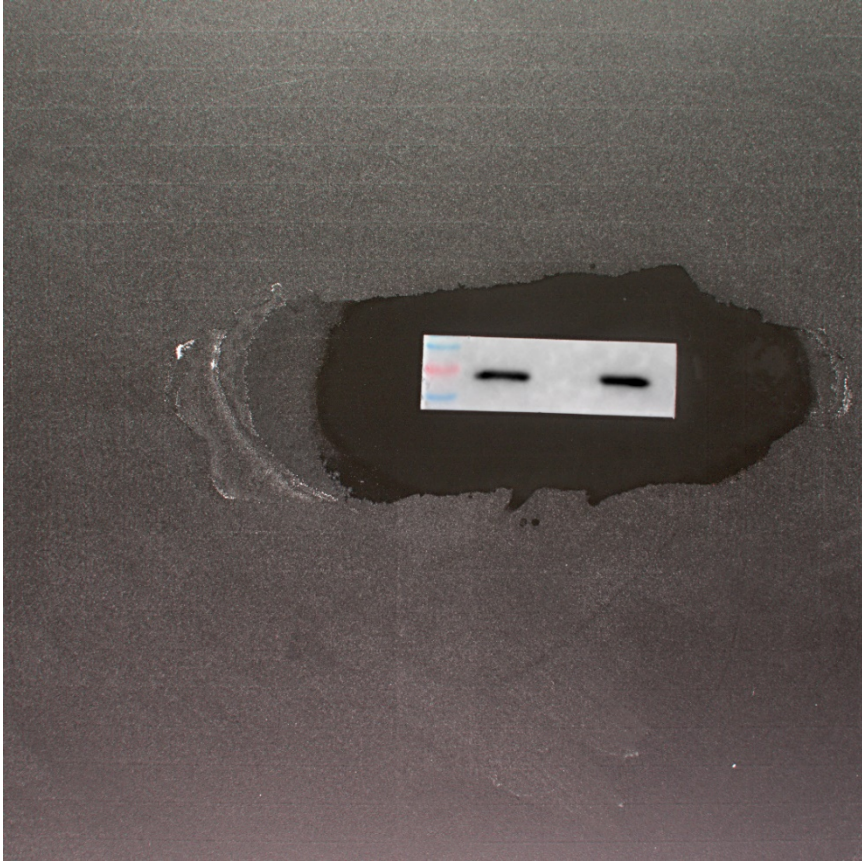

Supplement: 41418_2023_1198_MOESM3_ESM.pdf [file 41418_2023_1198_MOESM3_ESM.pdf]
