# Supplementary material
Source: PubMed Central journal article supplement (PMC10482833)
Supplement: 41418_2023_1198_MOESM1_ESM.pdf [file 41418_2023_1198_MOESM1_ESM.pdf]

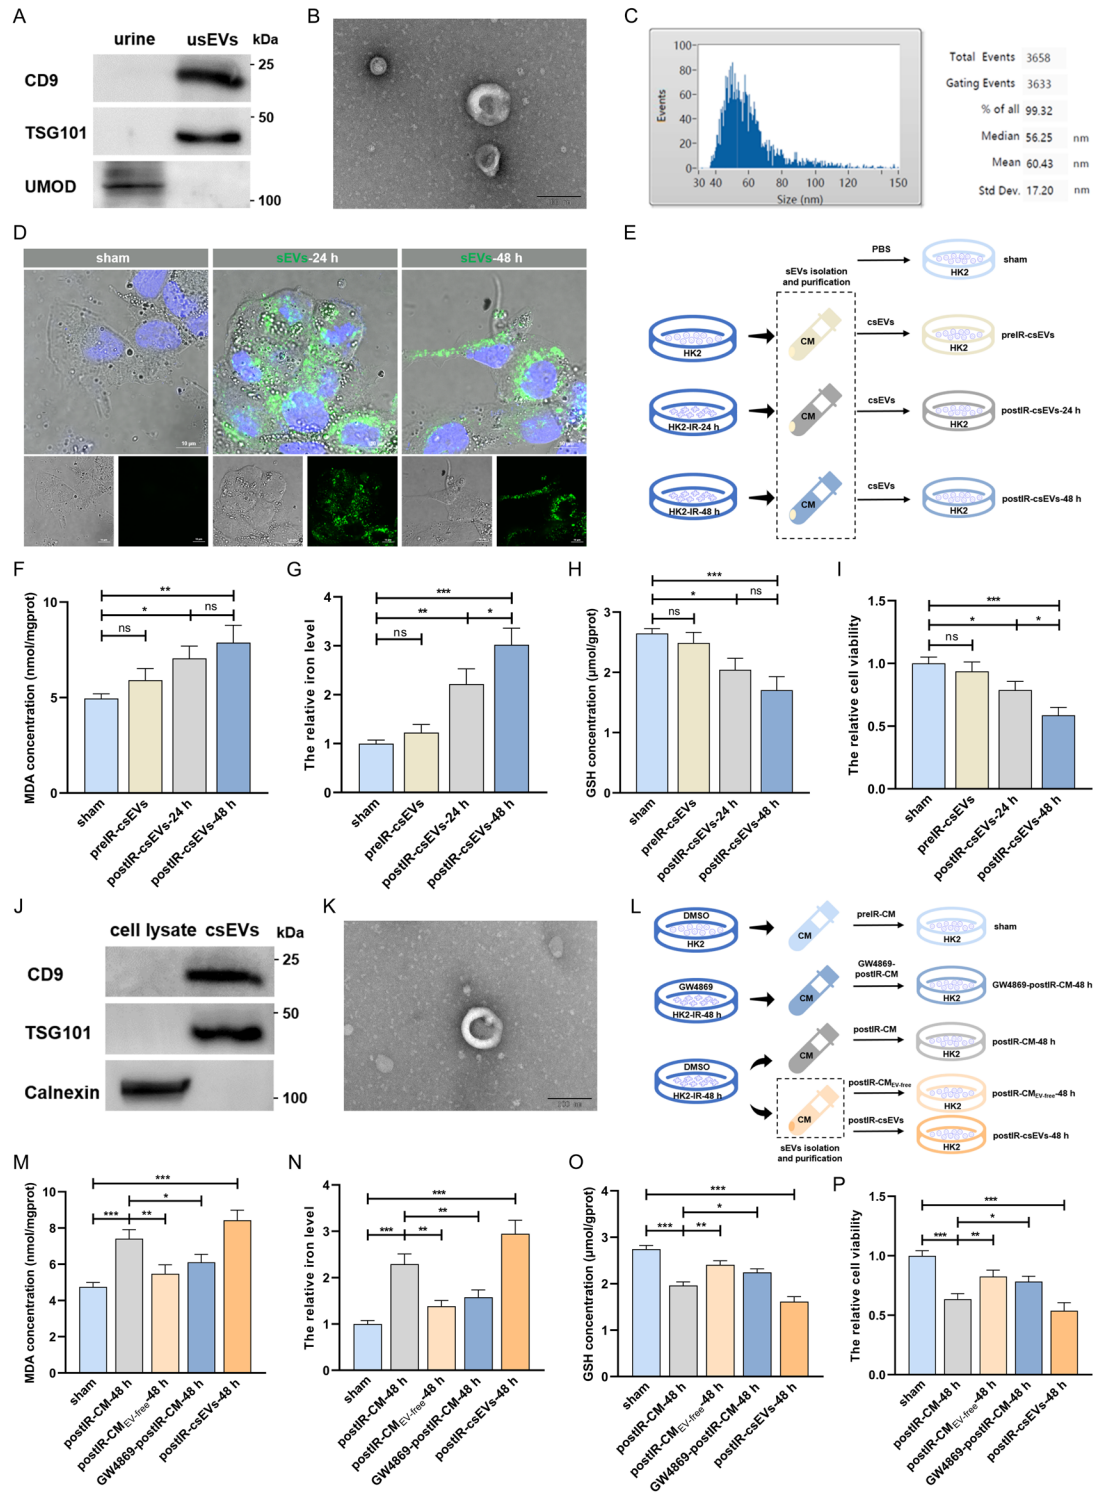

**Figure S1. IRI-sEVs induce ferroptosis in normal renal tubular epithelial cells.** (A) IB illustrating the expression of three categories of usEV markers (CD9, TSG101, and UMOD). (B) usEV morphologies were observed by TEM; scale bar: 100 nm. (C) Flow NanoAnalyzer showing the

particle size ranges of usEVs. (D) IF assays recording the intracellular uptake of sEVs (labeled with PKH67, green) by HK-2 cells; scale bar: 10  $\mu\text{m}$ . (E) Schematic showing the flow to construct the in vitro intervention model using HK-2 cells and csEVs derived from different HK-2 cell supernatant; preIR-csEVs: csEVs isolated from HK-2 cells without ischemia-reperfusion treatment, postIR-csEVs-24/48 h: csEVs isolated from HK-2 cells 24/48 h after ischemia-reperfusion administration. (F-I) MDA concentration, iron level, GSH concentration and cell viability were detected in HK-2 cells following csEV treatments ( $n = 6$  group<sup>-1</sup>); the result of iron level and cell viability was normalized according to the result of sham; one-way ANOVA followed by Tukey's test. The csEV marker proteins and morphologies were examined by IB assays (J) and TEM (K) respectively. (L) Different CM and csEVs were employed to treat HK-2 cells and simulated the renal tissue microenvironment in vitro. (M-P) MDA concentration, iron level, GSH concentration and cell viability were detected in HK-2 cells after distinct treatments ( $n = 6$  group<sup>-1</sup>); the result of iron level and cell viability was normalized according to the result of sham; one-way ANOVA followed by Tukey's test. \*\*\* $p < 0.001$ , \*\* $p < 0.01$ , and \* $p < 0.05$  represent significant differences between two groups; ns represents no significant difference.

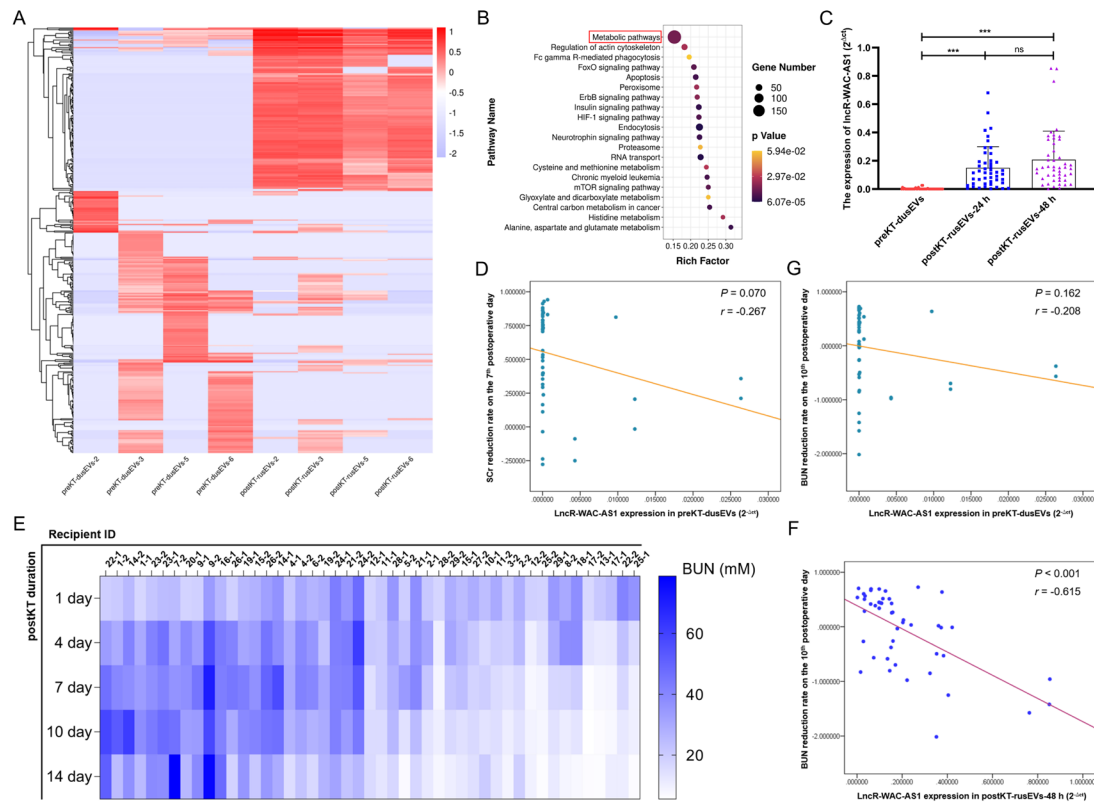

**Figure S2. LncRNA-WAC-AS1 enriched in IRI-sEVs impedes graft function recovery.** (A) Cluster heatmap delineating all identified differential lncRNAs between the paired preKT-dusEVs (n = 4) and postKT-rusEVs (n = 4). (B) Kyoto Encyclopedia of Genes and Genomes (KEGG) analysis of upregulated lncRNAs in postKT-rusEVs. (C) Quantitative analysis of the level of lncRNA-WAC-AS1 in the paired preKT-dusEVs (n = 29), postKT-rusEVs-24 h (n = 47) and postKT-rusEVs-48 h (n = 47) by unpaired 2-tailed Student's t test. (D) Correlation analysis between lncR-WAC-AS1 level in preKT-dusEVs and the SCr recovery rate on the 7<sup>th</sup> postoperative day (n = 47). (E) Heatmap illustrating the BUN concentration of recipients after kidney transplantation. Correlation analysis between the BUN reduction rate on the 10<sup>th</sup> postoperative day (n

= 47) and the IncR-WAC-AS1 level in preKT-dusEVs (F) and postKT-rusEVs-48 h (G). \*\*\* $p < 0.001$  represents significant differences between two groups; ns represents no significant difference.

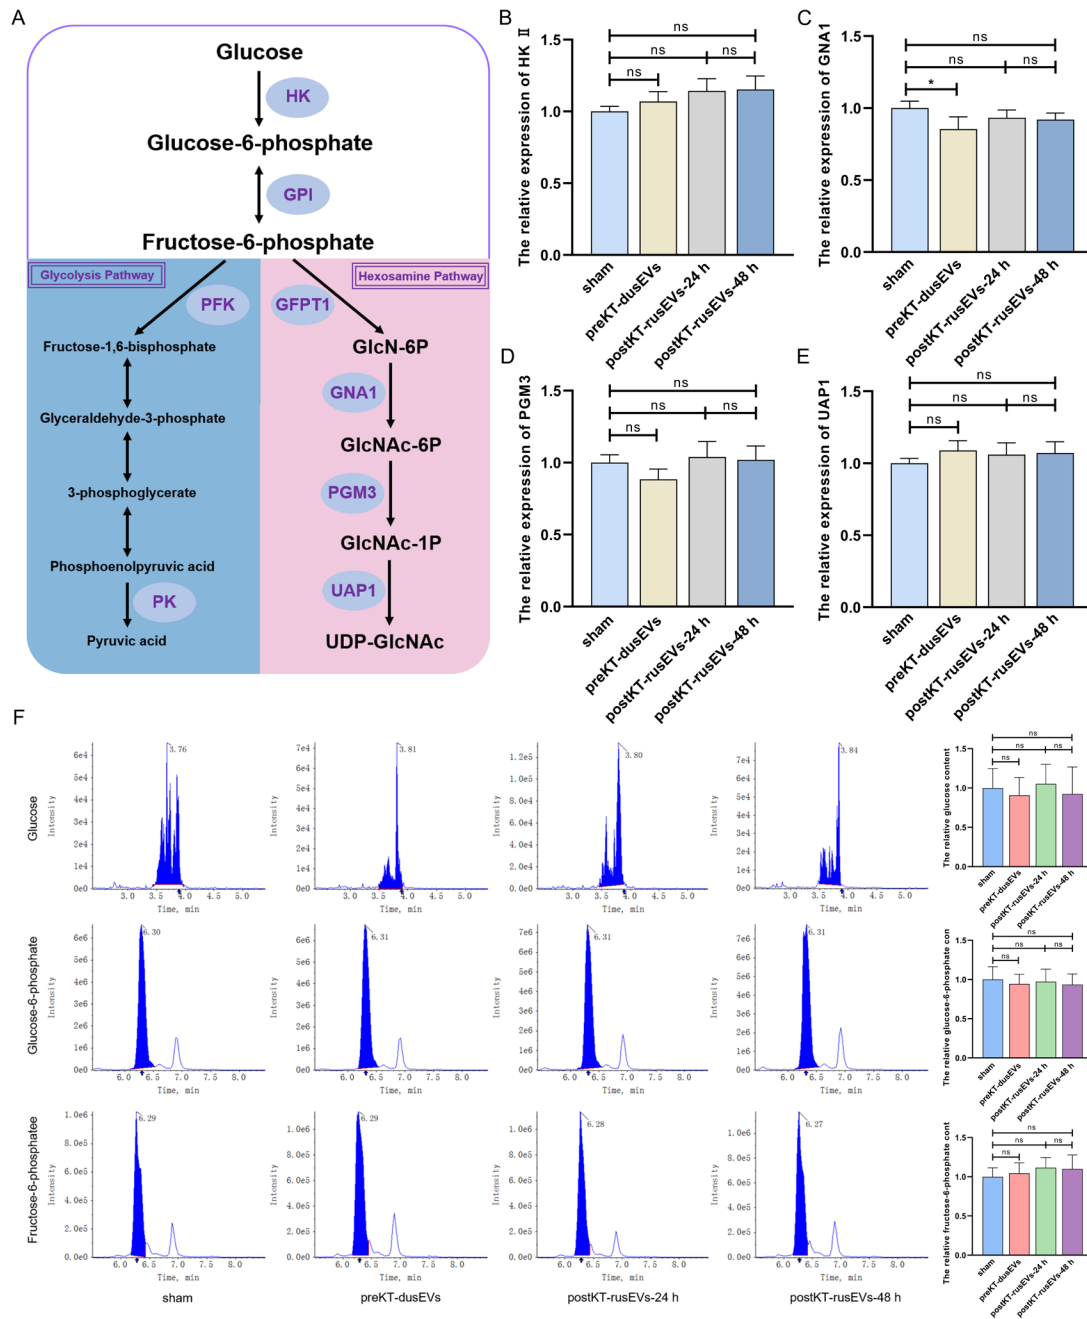

**Figure S3. IRI-sEVs have no effects on other metabolic enzymes before and in the HBP branch. (A) Schematic representation of HBP and**

glycolysis pathway in the glucose metabolism process. (B-E) The transcriptional levels of some glucose metabolic enzymes in HK-2 cells before and after 47 pairs of usEV treatments; the results were normalized according to the result of sham; one-way ANOVA followed by Tukey's test. (F) The contents of glucose metabolic metabolites before the HBP branch (left) and quantitative analysis (right); one-way ANOVA followed by Tukey's test.  $*p < 0.05$  represents significant differences between two groups; ns represents no significant difference.

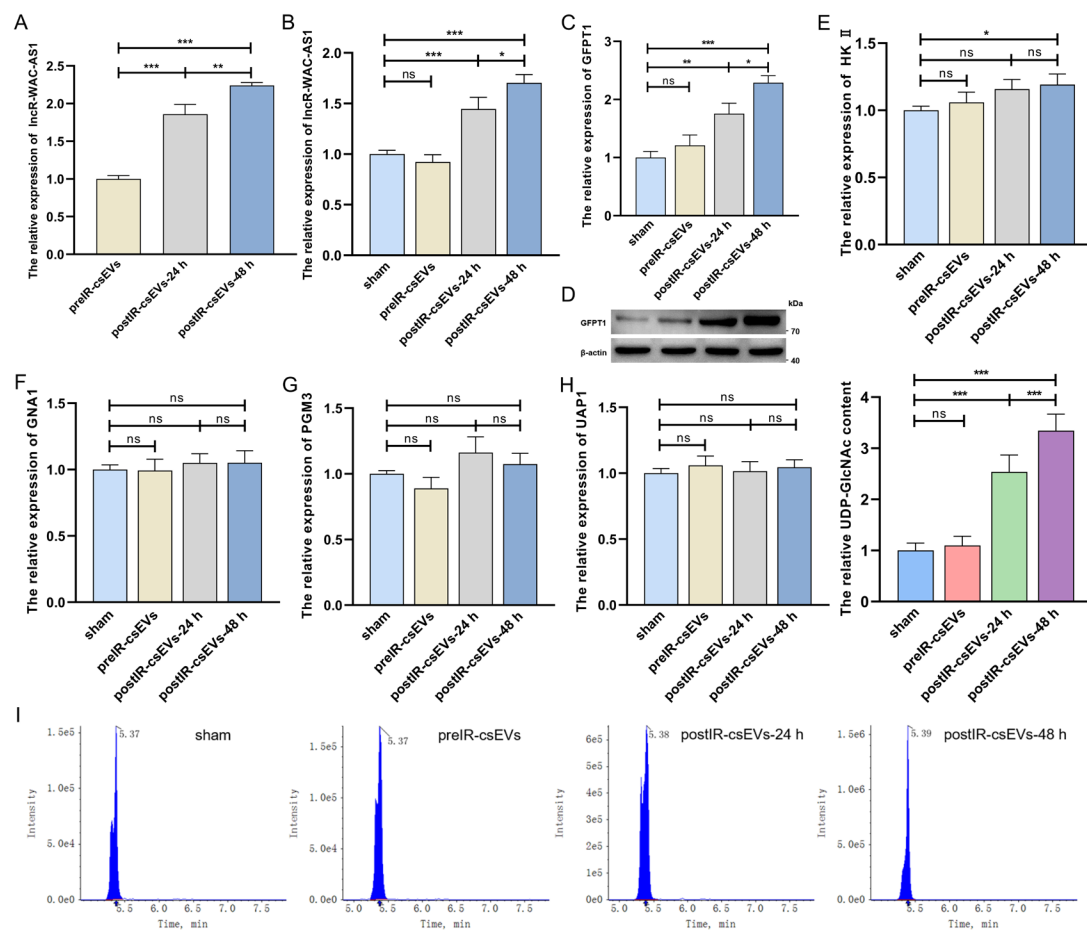

**Figure S4. IRI-sEVs accelerate HBP metabolism by upregulating GFPT1 in normal renal tubular epithelial cells. (A) The relative level of**

lncR-WAC-AS1 in preIR-csEVs, postIR-csEVs-24 h and postIR-csEVs-48 h (n = 6 group<sup>-1</sup>); the results were normalized according to the lncR-WAC-AS1 level in preIR-csEVs; one-way ANOVA followed by Tukey's test. The relative lncR-WAC-AS1 level (B), GFPT1 expression (C-D) and the transcriptional levels of other glucose metabolic enzymes (E-H) in HK-2 cells following different csEV treatments (n = 6 group<sup>-1</sup>); the results were normalized according to the result of sham; one-way ANOVA followed by Tukey's test. (I) The UDP-GlcNAc content in HK-2 cells after csEV treatments (bottom) and quantitative analysis (top); the UDP-GlcNAc level was normalized according to the sham; one-way ANOVA followed by Tukey's test. \*\*\* $p < 0.001$ , \*\* $p < 0.01$ , and \* $p < 0.05$  represent significant differences between two groups; ns represents no significant difference.

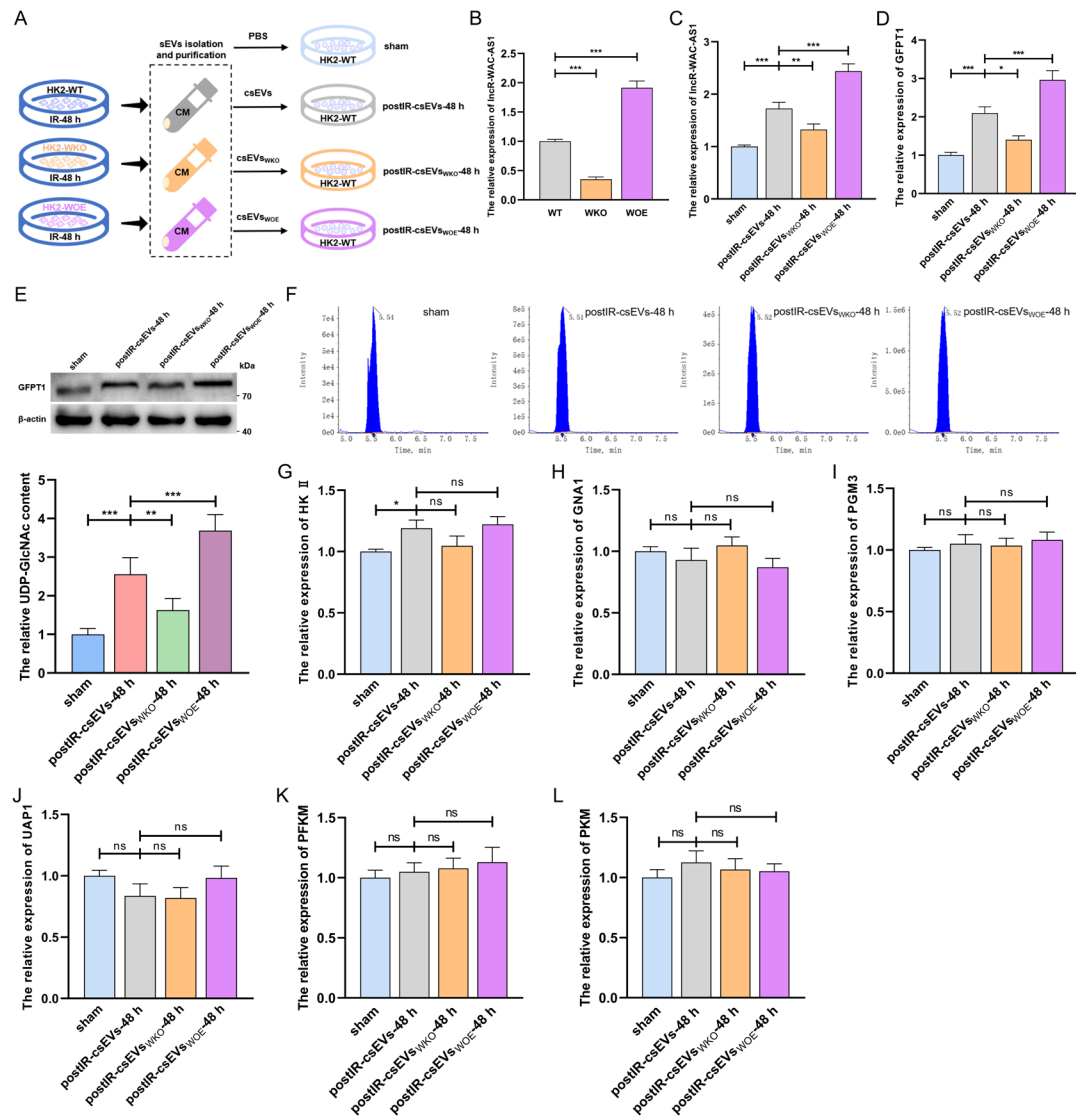

**Figure S5. LncRNA-WAC-AS1 enriched in IRI-sEVs induce GFPT1 and thus facilitate HBP metabolic reprogramming in normal renal tubular epithelial cells. (A)** Schematic delineating the flow to establish the in vitro intervention model using HK-2 cells and csEVs derived from different HK-2 cells; csEVs<sub>WKO</sub>: csEVs isolated from lncRNA-WAC-AS1-knockout HK-2 cells, csEVs<sub>WOE</sub>: csEVs isolated from HK-2 cells with stable overexpression of lncRNA-WAC-AS1 (WOE). **(B)** The relative level of lncRNA-WAC-AS1 in different HK-2 cells (n = 6 group

<sup>1</sup>); the results were normalized according to the lncR-WAC-AS1 level in WT; one-way ANOVA followed by Tukey's test. The relative lncR-WAC-AS1 level (C), GFPT1 expression (D-E), UDP-GlcNAc content (F) and the transcriptional levels of other glucose metabolic enzymes (G-L) in HK-2 cells after distinct csEV treatments (n = 6 group<sup>-1</sup>); the results were normalized according to the result of sham; one-way ANOVA followed by Tukey's test. \*\*\**p* < 0.001, \*\**p* < 0.01, and \**p* < 0.05 represent significant differences between two groups; ns represents no significant difference.

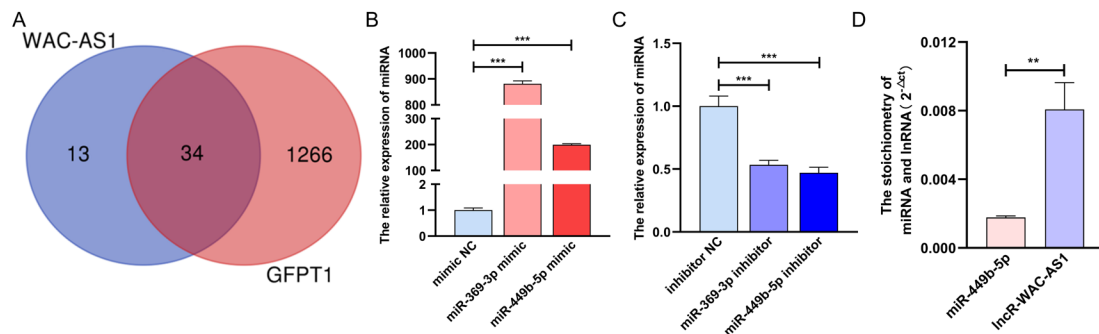

**Figure S6. LncRNA-WAC-AS1 modulates GFPT1 by competitively binding to miRNAs.** (A) Venn diagram illustrating the predicted miRNAs bound to lncRNA-WAC-AS1 and GFPT1 in the Starbase database. (B-C) The relative levels of miRNAs in HK-2 cells transfected with miRNA mimics and inhibitors (n = 6 group<sup>-1</sup>); the expression levels were normalized according to the result in mimic NC or inhibitor NC; one-way ANOVA followed by Tukey's test. (D) The expression levels of miR-449b-5p and lncRNA-WAC-AS1 in HK-2 cells (n = 6 group<sup>-1</sup>); unpaired 2-tailed



Student's t test. \*\*\* $p < 0.001$  and \*\* $p < 0.01$  represent a significant difference between two groups.

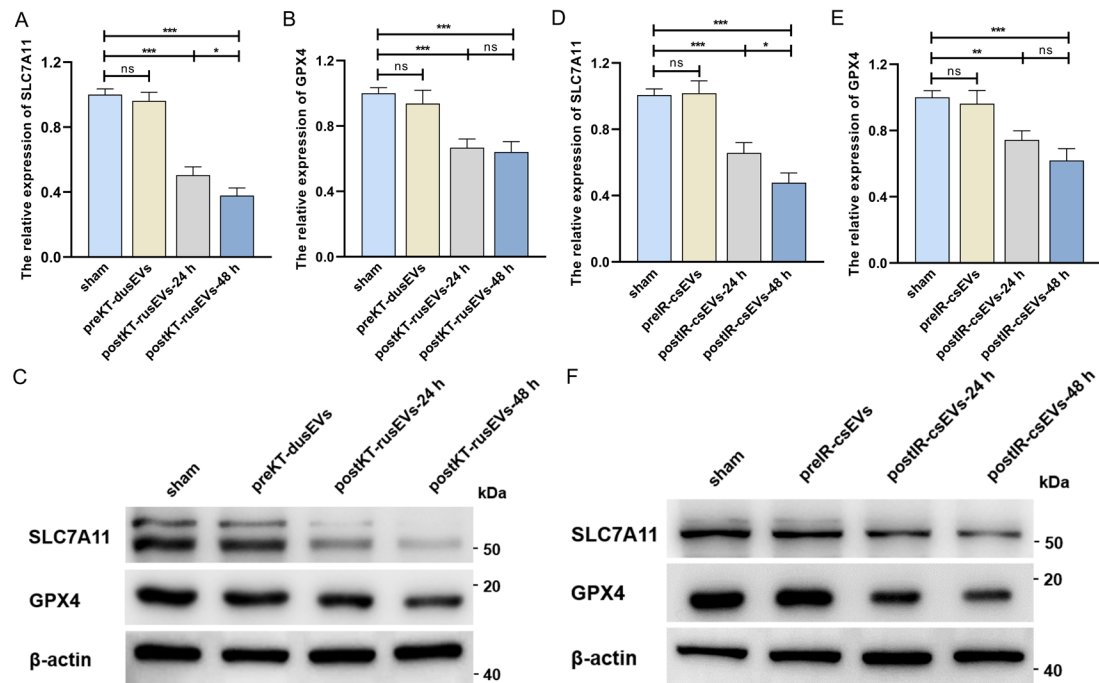

**Figure S7. IRI-sEVs inhibit the expression of SLC7A11 and GPX4 in normal renal tubular epithelial cells.** The transcriptional (A-B) and translational (C) levels of SLC7A11 and GPX4 in HK-2 cells following 47 pairs of usEV treatments; one-way ANOVA followed by Tukey's test. The mRNA levels of SLC7A11 (D) and GPX4 (E) in HK-2 cells after csEV administrations were normalized according to the level of sham ( $n = 6$  group<sup>-1</sup>); one-way ANOVA followed by Tukey's test. (F) IB assays detecting the protein expression of SLC7A11 and GPX4. \*\*\* $p < 0.001$ , \*\* $p < 0.01$ , and \* $p < 0.05$  represent significant differences between two groups; ns represents no significant difference.

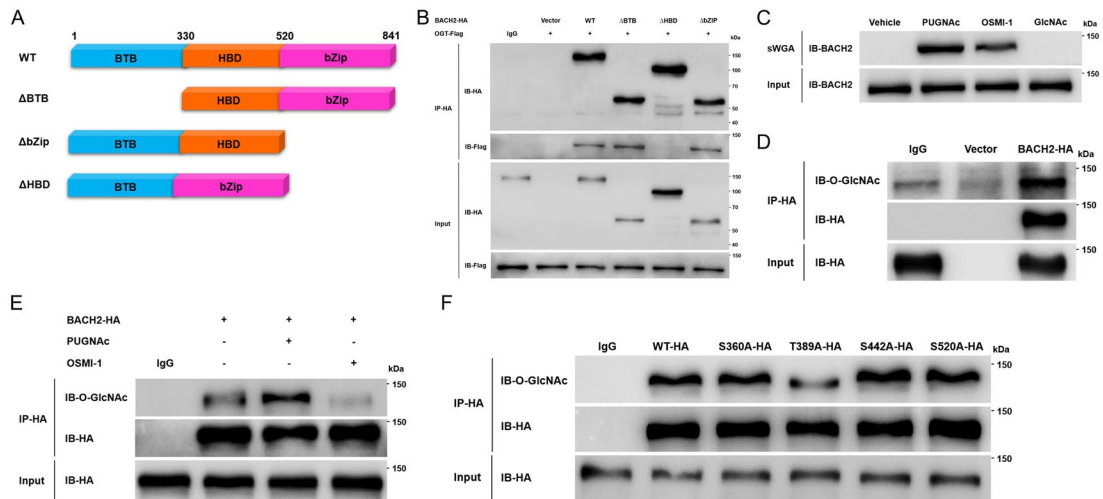

**Figure S8. Thr 389 is the key O-GlcNAcylated site on BACH2.** (A) Schematic delineating the BACH2 construct. WT BACH2 contains three main domains, including a domain of broad-complex, tramtrack and bric a brac (BTB), a heme-binding domain (HBD) and a basic-leucine zipper domain (bZIP); truncation mutants of BACH2, comprising amino acids 331–841 ( $\Delta$ BTB), 1–520 ( $\Delta$ bZIP), and the full-length removal of 331–520 ( $\Delta$ HBD). (B) Co-IP assays of interactions between OGT and different BACH2 fragments, such as WT BACH2, the  $\Delta$ BTB, the  $\Delta$ HBD and the  $\Delta$ bZIP, in 293T cells. (C) sWGA pull-down assays were conducted in HK-2 cells following treatments with 50  $\mu$ M PUGNAc or 50  $\mu$ M OSMI-1 for 24 h. IB assays were performed by anti-BACH2. (D) BACH2 IP assays using anti-HA antibody in 293T cells transfected with BACH2-HA or a vector control. IB assays were determined utilizing anti-O-GlcNAc and anti-HA antibodies. (E) Cell lysates of HK-2 cells administrated with 50  $\mu$ M PUGNAc or 50  $\mu$ M

OSMI-1 were immunoprecipitated using an anti-HA antibody followed by IB assays. (F) IP assays using an anti-HA antibody in HK-2 cells transfected with vectors containing BACH2 full-length cDNA fragments or different site-directed mutants.

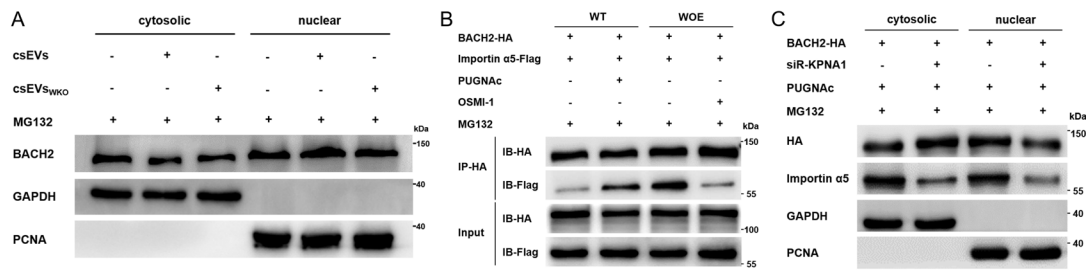

**Figure S9. Importin  $\alpha$ 5 mediates the nuclear translocation of BACH2.** (A) IB results illustrating the cytosolic and nuclear levels of endogenous BACH2 in HK-2 cells treated with 40  $\mu$ M MG132 and 100  $\mu$ g csEVs either or 100  $\mu$ g csEV<sub>swko</sub>. (B) IP assays using an anti-HA antibody in WT and WOE HK-2 cells co-transfected with BACH2-HA and importin  $\alpha$ 5-Flag after administrations of 40  $\mu$ M MG132 and 50  $\mu$ M PUGNAc either or 50  $\mu$ M OSMI-1. (C) IB assays detected the cytosolic and nuclear levels of HA-tagged BACH2 in HK-2 cells treated with siRNA-KPNA1 or not.

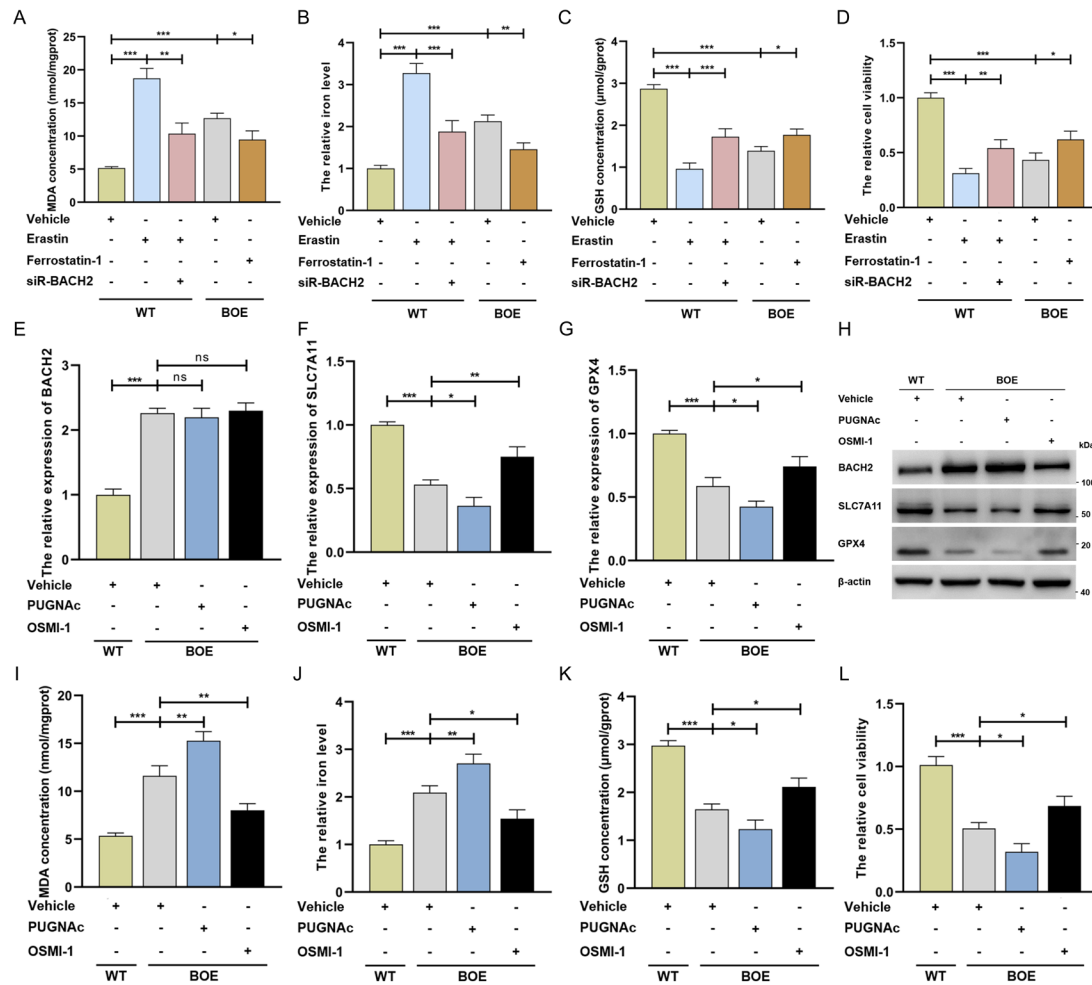

**Figure S10. BACH2 O-GlcNAcylation promotes ferroptosis by suppressing transcription of SLC7A11 and GPX4.** (A-D) MDA concentration, iron level, GSH concentration and cell viability were determined in HK-2 cells with different expression levels of BACH2 following treatments with 10  $\mu$ M erastin or 1  $\mu$ M ferrostatin-1 ( $n = 6$  group<sup>-1</sup>); the iron level and cell viability were normalized according to the result of WT-vehicle group; one-way ANOVA followed by Tukey's test. The mRNA (E-G) and protein (H) levels of BACH2, SLC7A11 and GPX4, and ferroptosis levels (I-L) in WT and BACH2-overexpressing

HK-2 cells (BOE) after administration of 50  $\mu\text{M}$  PUGNAc or 50  $\mu\text{M}$  OSMI-1 ( $n = 6$  group<sup>-1</sup>); one-way ANOVA followed by Tukey's test. \*\*\* $p < 0.001$ , \*\* $p < 0.01$ , and \* $p < 0.05$  represent significant differences between two groups; ns represents no significant difference.

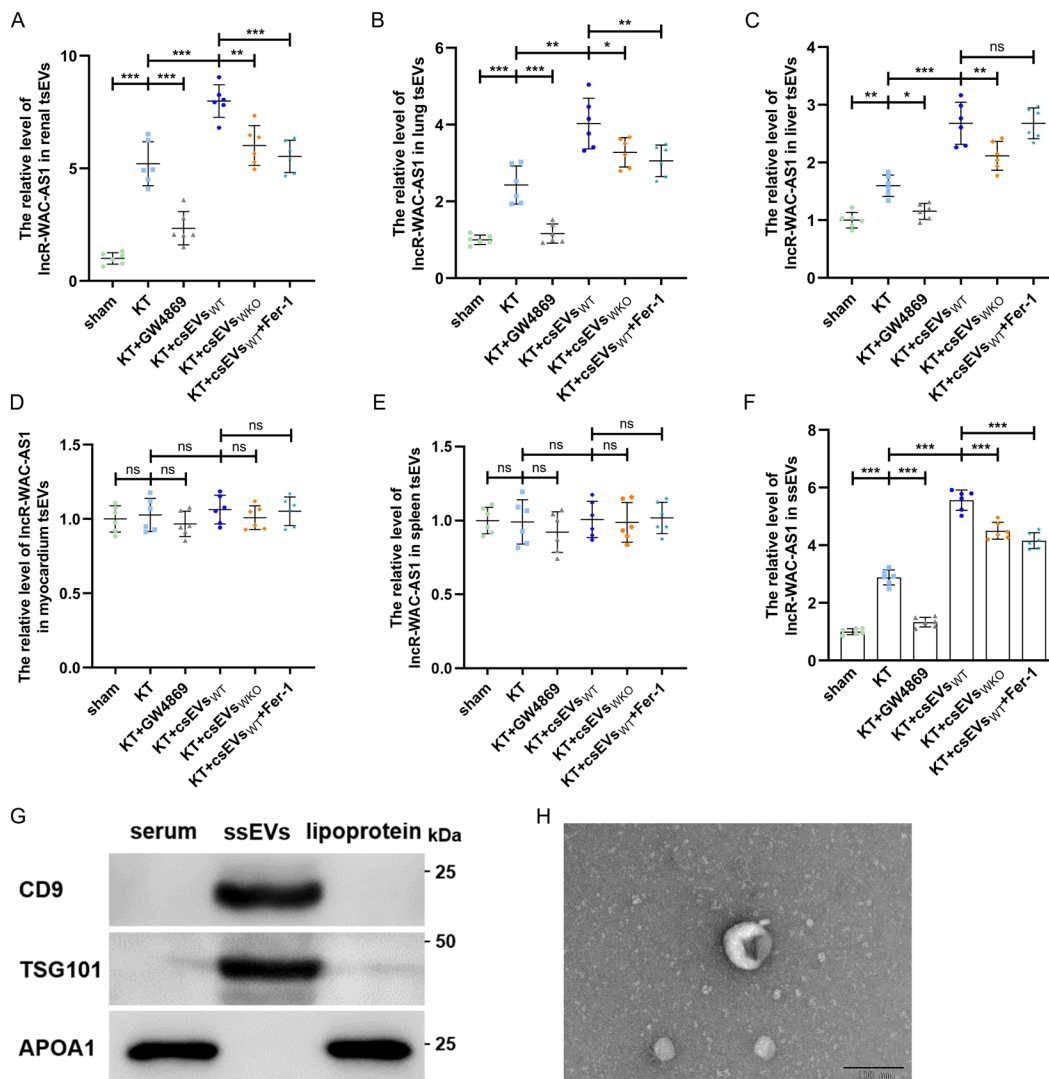

**Figure S11. IRI-sEVs lead to the systemic spread of lncRNA-WAC-AS1 during mouse kidney transplantation.** The relative levels of lncR-WAC-AS1 in tsEVs derived from graft renal (A), lung (B), liver (C), myocardium (D) and spleen (E), and serum-derived sEVs (ssEVs, F) were

normalized according to the levels of sham ( $n = 6$  group<sup>-1</sup>); one-way ANOVA followed by Tukey's test. The ssEV marker proteins and morphologies were detected by IB assays (G) and TEM (H) respectively. \*\*\* $p < 0.001$ , \*\* $p < 0.01$ , and \* $p < 0.05$  represent significant differences between two groups; ns represents no significant difference.

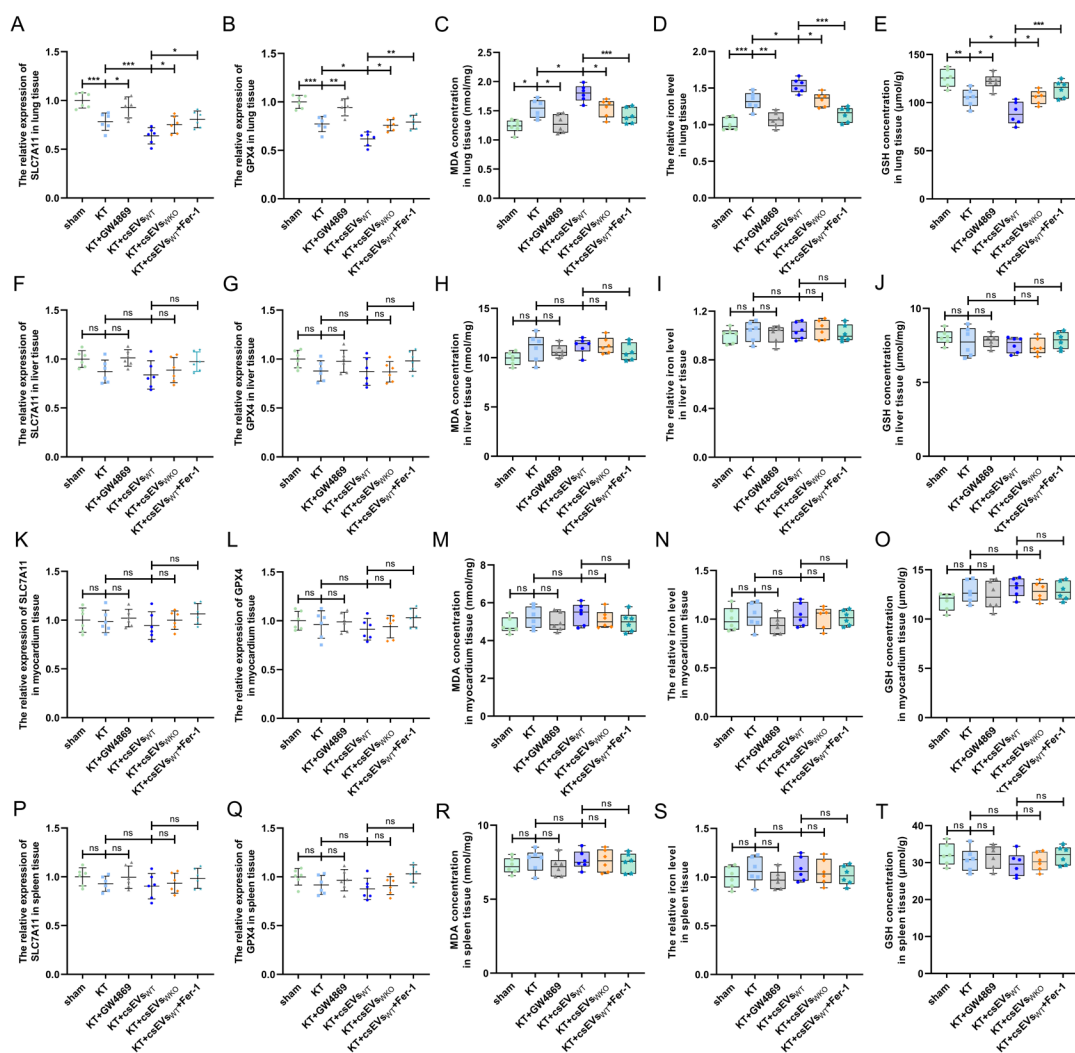

**Figure S12. IRI-sEVs promote “wave of ferroptosis” propagation from kidney to lung.** The SLC7A11 and GPX4 expression, MDA concentration, iron level and GSH concentration in lung tissues (A-E), liver tissues (F-J),

myocardium tissues (K-O) and spleen tissues (P-T) of recipient mice were normalized according to the levels of sham (n = 6 group<sup>-1</sup>); one-way ANOVA followed by Tukey's test. \*\*\* $p < 0.001$ , \*\* $p < 0.01$ , and \* $p < 0.05$  represent significant differences between two groups; ns represents no significant difference.

**Table S1: The sequence of sgRNA, siRNA and primer**

| <b>Item</b>            | <b>Sequence</b>                      |
|------------------------|--------------------------------------|
| <b>sgRNA</b>           |                                      |
| <b>WAC-AS1-sgRNA-1</b> | CACCGAATGTAGAAAACGCT                 |
| <b>WAC-SA1-sgRNA-2</b> | CGTGCACGCATCTCCGCTGA                 |
| <b>GAL4-sgRNA</b>      | AACGACTAGTTAGGCGTGTA                 |
| <b>siRNA</b>           |                                      |
| <b>siR-KPNA1-1</b>     | GCAUGUUGGACGAUAUCUAAU                |
| <b>siR-KPNA1-2</b>     | GGUUUGUGGAGUUCCUCAAC                 |
| <b>siR-BACH2-1</b>     | GGCGCUGGUUGGACAGACAAA                |
| <b>siR-BACH2-2</b>     | GGGAAGAUAACUCUAGCAACA                |
| <b>Primer</b>          |                                      |
| <b>lncR-WAC-AS1</b>    | Forward CCATTTCTTCCCCTGGGCTT         |
|                        | Reverse TTAAGGTGCCTGCCTGTCTG         |
| <b>miR-369-3p</b>      | Forward TTGAAGGGAGATCGACCGTGT        |
|                        | Reverse CTGAGAAAAGATCAACCATGT        |
| <b>miR-449b-5p</b>     | Forward CTGTGTGTGATGAGCTGGCAG        |
|                        | Reverse TGTATATGCAATAAGACAGCA        |
| <b>GFPT1</b>           | Forward TCCCTTGTGATGTTTGCCCT         |
|                        | Reverse TCAGTGCCCCTTCAAGACAA         |
| <b>BACH2</b>           | Forward CTTTCTTTCAGGGTGTGAACGGC      |
|                        | Reverse CAGAGCCGAGTCACTAGGTATAA      |
| <b>SLC7A11-1</b>       | Forward ATGCAGTGGCAGTGACCTTT         |
|                        | Reverse GGCAACAAAGATCGGAACTG         |
| <b>SLC7A11-2</b>       | Forward TTGTTTTGCACCCTTTGACA         |
|                        | Reverse AAAGCTGGGATGAACAGTGG         |
| <b>GPX4-1</b>          | Forward CGGAATTCATGAGCCTCGGCCGCCTTTG |



---

|                                   |         |                               |
|-----------------------------------|---------|-------------------------------|
|                                   | Reverse | CCGCTCGAGGAAATAGTGGGGCAGGTCCT |
| <b>GPX4-2</b>                     | Forward | GTAACCAGTTCGGGAAGCAG          |
|                                   | Reverse | TGTCGATGAGGAACTGTGGA          |
| <b>HK II</b>                      | Forward | GCCCGCCAGAAGACATTAG           |
|                                   | Reverse | TGCTCAGACCTCGCTCCAT           |
| <b>GAN1</b>                       | Forward | CATCCTGGAGAAGGCTTGGTT         |
|                                   | Reverse | GCTGACAACCTCCAGTCTCTGT        |
| <b>PGM3</b>                       | Forward | GGCCGATATGGAAAGGCAAC          |
|                                   | Reverse | GCCATTTGCACAGTCAACCT          |
| <b>UAP1</b>                       | Forward | ACCAGTGGCAGAACAATGGA          |
|                                   | Reverse | AGTGCCCGATAAAGACCACC          |
| <b>PFKM</b>                       | Forward | GGTGGATGGTGGAGATCACA          |
|                                   | Reverse | TTCCCGAAAGTCCTTGCACC          |
| <b>PKM</b>                        | Forward | ACGTGGATGATGGGCTTATTTCT       |
|                                   | Reverse | ACGCAAACACCATATCAACATCC       |
| <b><math>\beta</math>-actin-1</b> | Forward | CCTTCCTGGGCATGGAGTC           |
|                                   | Reverse | TGATCTTCATTGTGCTGGGTG         |
| <b><math>\beta</math>-actin-2</b> | Forward | CCACCATGTACCCAGGCATT          |
|                                   | Reverse | CAGCTCAGTAACAGTCCGCC          |

---

**Table S2 Gene sequence used in luciferase reporter assay**

| Gene            | Sequence (5'-3')                                                                                                                                                                                                                              |
|-----------------|-----------------------------------------------------------------------------------------------------------------------------------------------------------------------------------------------------------------------------------------------|
| SLC7A11-WT      | TAAATGATGAAGACCTAACCGATTTTAGAGAAATTTTCACACACG<br>AAACAAGAGATTTTTTCGAATCCAGTCAACTCGTTGTTTCGAGGAG<br>GACAAAAAAGAAAAAATTTTTTTCTCGACTCATTACGACCTC<br>CGAAGAGTACACCGACTACGTTTGGACCTCTTAAACGTAGTAGTA<br>AATCGACATCATTCAACCACAC                      |
| SLC7A11-MT      | TAAATGATGAAGACCTAACCGATTTTAGAGAAATTTTCACACACG<br>AAACAAGAGATTTTTTCGAATCCAGTCAACTCGTTGTTTCGAGGAG<br>GACAAAAAAGAAAAAATTTTTTTT <b>AGAGCTGAGTAATG</b> GACCTC<br>CGAAGAGTACACCGACTACGTTTGGACCTCTTAAACGTAGTAGTA<br>AATCGACATCATTCAACCACAC           |
| GPX4-WT         | GAGCTGCGATGGAGCCACTGCACTCCAGCCTGGGTGACAGAC<br>CAAGACTCCTCAAAAAAAAAAAAAAAAAAATCCAAACCCCTGCCT<br>GTACAGGGGTCAAAGTCCAATCACGGTGACTCAGTTCCCAAGT<br>ATGAGATGAGTGTCTGTTGCCACATGTCCAAGCCACGAAGTG<br>AAAACAGAGTTGGAAGCCAAGATGTGG                       |
| GPX4-MT         | GAGCTGCGATGGAGCCACTGCACTCCAGCCTGGGTGACAGACC<br>AAGACTCCTCAAAAAAAAAAAAAAAAAAATCCAAACCCCTGCCTGT<br>ACAGGGGTCAAAGTCCAATCAC <b>AACAGTCTGACCTT</b> CAAGTAT<br>GAGATGAGTGTCTGTTGCCACATGTCCAAGCCACGAAGTGA<br>AAAACAGAGTTGGAAGCCAAGATGTGG             |
| lncR-WAC-AS1-WT | GCGGGGAGCGCCGCUCGGGGCAGGGAAUGAAAGCGGCGCUUG<br>AGACUGGAAUUUAGGGAGAUGAGUUCUUGGGAACAACGCUG<br>AACCAUCUCACUGCCCCACCCUACCCCUUGUUAUUUUUUUUGA<br>GACAGGUCUCGCGCUGUCGUCCAGUCUGAGUGCAGUGACGCGA<br>UCACGGCUCACUGCAGCCUCGACCUCCG                         |
| lncR-WAC-AS1-MT | GCGGGGAGCGCCGCUCGGGGCAGGGAAUGAAAGCGGCGCUUG<br>AGACUGGAAUUUAGGGAGAUGAGUUCUUGGGAACAAC <b>CGAG</b><br><b>UUGCUA</b> CUG <b>GACGG</b> CCACCCUACCCCUUGUUAUUUUUUUUGA<br>GACAGGUCUCGCGCUGUCGUCCAGUCUGAGUGCAGUGACGCGA<br>UCACGGCUCACUGCAGCCUCGACCUCCG |
| GFPT1-WT        | GUUAUGUUAGAAUUGUAUUGUACUAAGAAUGUAAUCAUGUCU<br>ACUUUAGUUGUAAACAUUUCUGAUGUCAAAACUUUAUUCAUUAC<br>UGUUGAUUUUAAGAAUAAGAAUCACUGCCUAAAUUUUACCAA<br>AGCCACUGUCUCUACCCGAACUUCCAGUUUGGAAAGAAUCGU<br>UAGAUAAAACAAAGGCUCUGCCCU                            |
| GFPT1-MT        | GUUAUGUUAGAAUUGUAUUGUACUAAGAAUGUAAUCAUGUCU<br>ACUUUAGUUGUAAACAUUUCUGAUGUCAAAACUUUAUUCAUUAC<br>UGUUGAUUUUAAGAA <b>AUUGUU</b> AUG <b>GACGG</b> UAAAUUUUACCAA<br>AGCCACUGUCUCUACCCGAACUUCCAGUUUGGAAAGAAUCGU<br>UAGAUAAAACAAAGGCUCUGCCCU          |
| BACH2           | ATGTCTGTGGATGAGAAGCCTGACTCCCCATGTATGTGTATGAGT<br>CCACAGTCCACTGCACCAACATCCTCCTGGGCCTCAATGACCAGC                                                                                                                                                |

---

GGAAAAAGGATATTCTCTGTGACGTGACTTTGATCGTGGAGAGG  
AAGGAGTTCCGGGCCACCGGGCTGTGCTGGCCGCATGCAGTG  
AATATTTTGGCAGGCGCTGGTTGGACAGACAAAAAATGATTTG  
GTGGTCAGCTTGCCTGAGGAGGTCACAGCCAGGGGCTTTGGGC  
CGCTGTTACAGTTTGCCTACACTGCCAAGCTGTTACTCAGCAGA  
GAAAACATCCGCGAGGTCATCCGCTGTGCTGAGTTCCTGCGCAT  
GCACAACCTGGAGGACTCCTGCTTCAGCTTCCTGCAGACCCAGC  
TCCTGAACAGTGAGGATGGCCTGTTTGTGTGCCGGAAGGATGC  
TGCGTGCCAGCGCCCACACGAGGACTGCGAGAACTCTGCAGGAG  
AGGAGGAGGATGAAGAGGAGGAGACGATGGATTCAGAGACGGCC  
AAGATGGCTTGCCCCAGGGACCAGATGCTTCCAGAGCCCATCAGC  
TTTGAGGCCGCCGCCATCCCCGTAGCAGAGAAGGAAGAAGCCCTG  
CTGCCCCGAGCCTGACGTGCCACAGACACCAAGGAGAGCTCAGAA  
AAGGACGCGTTAACGCAGTACCCAGATAACAAGAAATACCAGCTTG  
CATGTACCAAGAATGTCTATAATGCATCATCACACAGTACCTCAGGT  
TTTGAAGCACATTCCGGGAAGATAACTTAGCAACAGCCTCAAG  
CCGGGGCTTGCCAGGGGGCAGATTAAGTGTGAGCCGCCAGTGA  
AGAGAATGAGGAAGAGAGCATCACGCTCTGCCTGTCTGGAGATGA  
GCCTGACGCCAAGGACAGAGCGGGGGATGTCGAGATGGACCGGA  
AACAGCCCAGCCCTGCCCCTACCCACGCCCCAGCTGGGGCCG  
CCTGCCTGGAGAGATCCAGGAGCGTGGCCTCGCCCTCTGCTTAA  
GGTCTCTGTTACGCATAACGAAAAGTGTGGAGCTGTCTGGCCTGC  
CCAGTACATCTCAGCAGCACTTTGCCAGGAGTCCAGCCTGCCCTT  
TTGACAAGGGGATCACTCAGGGTGACCTTAAACTGACTACACC  
CTTTCACAGGGAATTATGGACAGCCCCACGTGGGCCAGAAGGAGG  
TGTCCTCACTTACCATGGGGTCGCCCCCTCAGGGGGCCTGGGTTG  
GAGGCTCTCTGTAAACAGGAGGGAGAGCTGGACCGGAGGAGCGT  
GATCTTCTCCTCCAGCGCTTGTGACCAAGTGAGCACCTCGGTGCA  
TTCTTATTCTGGGGTGAGCAGTTTGGACAAAGACCTCTCTGAGCC  
GGTGCCAAAGGGTCTGTGGGTGGGAGCCGGCCAGTCCCTCCCA  
GCTCGCAGGCCTACTCCCACGGTGGGCTGATGGCCGACCACTTGC  
CAGGAAGGATGCGGCCAACACCAGCTGCCCGGTACCAATCAAAG  
TCTGCCCTCGCTCACCCCCCTTGAGACCAGGACCAGGACTTCCA  
GCTCCTGCTCTTCTATTCTACGCGGAGGACGGGAGCGGGGGCT  
CACCTGCAGCCTCCCTCTCTGTGAGTTCTCCTCCTCGCCCTGTT  
CCAGGGAGCCAGATTCCCTTGCCACAGAACATCAGGAACCAGGCCT  
GATGGGAGATGGAATGTACAACCAAGTGCGGCCCAAATTAATG  
TGAGCAGTCTTATGGAACCAACTCCAGTGACGAATCCGGATCGTT  
CTCGGAAGCAGACAGTGAGTCGTGTCCTGTGCAGGACAGGGGCC  
AGGAGGTAAACTTCCTTTTCTGTAGATCAAATCACAGATCTTCC  
AAGGAACGATTTCCAGATGATGATTAATAATGCACAAGCTAACCTCA  
GAACAGTTAGAGTTTATTATGATGTCCGACGGCGCAGCAAGAACC  
GCATCGCGGCCAGCGCTGCCGAAAAGGAACTGGACTGTATTC  
AGAATTTAGAATGTGAAATCCGCAAATTGGTGTGTGAGAAAGAGA

---

---

AACTGTTGTCAGAGAGGAATCAACTGAAAGCATGCATGGGGGAA  
CTGTTGGACAACCTTCTCCTGCCTTTCCCAGGAAGTTTGCCGAGA  
CATCCAGAGCCCCGAGCAGATCCAGGCCCTGCATCGGTATTGCC  
CTGTCCTCAGACCCATGGACTTGCCCACGGCCTCCAGTATTAACC  
CTGCGCCCTTGGGTGCTGAGCAGAACATTGCGGCCTCCCAATGC  
GCAGTGGGGGAAAACGTGCCCTGCTGCTTGGAGCCAGGCGCGG  
CTCCCCCGGACCCCCCTGGGCACCCAGCAACACCTCCGAGAAT  
TGTACCTCTGGGAGGAGACTAGAAGGCACTGACCCGGGAACCTT  
CTCAGAGAGAGGACCTCCTCTTGAACCCAGGAGCCAAACAGTGA  
CCGTGGACTTCTGCCAGGAAATGACTGATAAGTGTACAACCTGAC  
GAACAGCCCAGGAAAGATTATACCTAG

---

**miR-449b-5p** AGGCAGUGUAUUGUUAGCUGGC

---

**mimic** CAGCUAACAAUACACUGCCUUU

---

Note: The mutants of binding sites are marked red. WT: wide-type; MT: mutant.

**Table S3: Antibodies used for IB, IP, ChIP, RIP and IF assays**

| Antibodies                                         | Source                    | Antibody dilution | Identifier      |
|----------------------------------------------------|---------------------------|-------------------|-----------------|
| <b>Western blotting</b>                            |                           |                   |                 |
| Rabbit anti-GFPT1                                  | Abcam                     | 1:1000            | Cat#ab125069    |
| Mouse anti-O-GlcNAc                                | Abcam                     | 1:1000            | Cat#ab2739      |
| Rabbit anti- BACH2                                 | Abcam                     | 1:2000            | Cat#ab226394    |
| Rabbit anti- OGT                                   | Abcam                     | 1:1000            | Cat#ab96718     |
| Rabbit anti-CD9                                    | Abcam                     | 1:1000            | Cat# ab236630   |
| Mouse anti-TSG101                                  | Abcam                     | 1:1000            | Cat# ab83       |
| Rabbit anti-HA                                     | Cell Signaling Technology | 1:1000            | Cat#3724        |
| Rabbit anti- DYKDDDDK                              | Cell Signaling Technology | 1:1000            | Cat#14793       |
| Rabbit anti-Calnexin                               | Cell Signaling Technology | 1:1000            | Cat# 2679       |
| SLC7A11                                            | Proteintech               | 1:1000            | 26864-1-AP      |
| GPX4                                               | Proteintech               | 1:2000            | 67763-1-Ig      |
| Mouse anti- $\beta$ -actin                         | Proteintech               | 1:5000            | Cat# 66009-1-Ig |
| Rabbit anti-PCNA                                   | Proteintech               | 1:5000            | Cat# 10205-2-AP |
| Mouse anti-GAPDH                                   | Proteintech               | 1:5000            | Cat# 60004-1-Ig |
| Rabbit anti-KPNA1                                  | Proteintech               | 1:1000            | Cat# 18137-1-AP |
| Rabbit anti-UMOD                                   | R&D Systems               | 1:1000            | Cat# MAB5175    |
| <b>IP</b>                                          |                           |                   |                 |
| Mouse anti-DYKDDDDK-Tag                            | Abmart                    | 1:100             | Cat# M20008     |
| Mouse anti-HA-Tag                                  | Abmart                    | 1:100             | Cat# M20003     |
| Rabbit anti-OGT                                    | Abcam                     | 1:100             | Cat# ab96718    |
| Rabbit anti-BACH2                                  | Abcam                     | 1:100             | Cat# ab226394   |
| sWGA-conjugated agarose beads                      | Vector Laboratories       | 1:10              | Cat# AL-1023S   |
| Protein A/G magnetic beads                         | MCE                       | -                 | Cat# HY-K0202   |
| <b>ChIP</b>                                        |                           |                   |                 |
| Rabbit anti-HA                                     | Cell Signaling Technology | 1:50              | Cat#3724        |
| <b>RIP</b>                                         |                           |                   |                 |
| Rabbit anti-AGO2                                   | Abcam                     | 1:50              | Cat#ab186733    |
| Rabbit anti-GFP                                    | Abcam                     | 1:50              | Cat#ab290       |
| <b>IF</b>                                          |                           |                   |                 |
| Rabbit anti- OGT                                   | Abcam                     | 1:1000            | Cat# ab96718    |
| SLC7A11                                            | Proteintech               | 1:500             | 26864-1-AP      |
| Mouse anti-HA-Tag                                  | Abmart                    | 1:1000            | Cat# M20003     |
| DAPI                                               | Cell Signaling Technology | 1:100             | Cat# 4083       |
| Goat anti-Rabbit IgG (Alexa Fluor® 488 Conjugate)  | Cell Signaling Technology | 1:500             | Cat# 4412       |
| Goat Anti-Mouse IgG (Alexa Fluor® 555 Conjugate)   | Cell Signaling Technology | 1:500             | Cat# 4409       |
| Goat Anti- Rabbit IgG (Alexa Fluor® 647 Conjugate) | Cell Signaling Technology | 1:500             | Cat# 4414       |

**Table S4: Chemicals, commercial assays and experimental models used in the study**

| Resource                                               | Source                   | Identifier  |
|--------------------------------------------------------|--------------------------|-------------|
| <b>Chemicals</b>                                       |                          |             |
| 2× Taq PCR Green Mix                                   | Takara                   | RR820A      |
| RNAiso Plus                                            | Takara                   | 9108        |
| PNGaseF (Glycerol-free), Recombinant                   | New england biolabs      | P0709S      |
| PUGNAc                                                 | Sigma–Aldrich            | A7229       |
| OSMI-1                                                 | Sigma–Aldrich            | SML1621     |
| Ferrostatin-1                                          | Sigma–Aldrich            | SML0583     |
| MG132                                                  | Sigma–Aldrich            | M7449       |
| CHX                                                    | Sigma–Aldrich            | 5087390001  |
| D-2-Deoxyglucose                                       | Sigma–Aldrich            | D8375       |
| Antimycin A                                            | Sigma–Aldrich            | A8674       |
| Lipofectamine 2000                                     | Invitrogen               | 11668019    |
| Lipofectamine 3000                                     | Invitrogen               | L3000015    |
| GW4869                                                 | MCE                      | HY-19363    |
| <b>Critical commercial assays</b>                      |                          |             |
| BCA protein assay Kit                                  | Thermo Fisher Scientific | 23227       |
| Nuclear and Cytoplasmic Protein Extraction Kit         | Thermo Fisher Scientific | 78833       |
| DAB kit                                                | Thermo Fisher Scientific | 34002       |
| Cell lysis buffer for Western and IP                   | Beyotime                 | P0013       |
| RIPA                                                   | Beyotime                 | P0013B      |
| PMSF                                                   | Beyotime                 | ST506       |
| 4% Paraformaldehyde                                    | Beyotime                 | P0099       |
| Penicillin-Streptomycin                                | Beyotime                 | C0223       |
| Lipid Peroxidation MDA Assay Kit                       | Beyotime                 | S0131S      |
| Cell Counting Kit-8                                    | Dojindo                  | CK04        |
| Dual-Luciferase® Reporter Assay System                 | Promega                  | E1910       |
| PVDF membranes                                         | Millipore                | ISEQ00010   |
| Magna RIP™ RNA-Binding Protein Immunoprecipitation Kit | Millipore                | 17-700      |
| PrimeScript® RT reagent Kit                            | Takara                   | RR047A      |
| Mir-X miRNA First-Strand Synthesis Kit                 | Takara                   | 638313      |
| Protease Inhibitor Cocktail                            | Bimake                   | B14001      |
| Dulbecco's modified Eagle's medium                     | Gibco                    | C11995500BT |
| DMEM/F12                                               | Gibco                    | 11320033    |
| Foetal bovine serum                                    | BioInd                   | 04-001-1A   |
| Bovine serum albumin                                   | Sigma–Aldrich            | V900933     |
| PKH67                                                  | Sigma–Aldrich            | MINI67      |
| PKH26                                                  | Sigma–Aldrich            | MINI26      |
| EDTA                                                   | Solarbio                 | E1170       |
| Reduced Glutathione (GSH) Colorimetric Assay Kit       | Elabscience              | E-BC-K030-M |
| Ferrous Iron Colorimetric Assay Kit                    | Elabscience              | E-BC-K773-M |

| <b>Cell lines</b>                 |                                              |                                       |
|-----------------------------------|----------------------------------------------|---------------------------------------|
| HK-2                              | Cell Bank of the Chinese Academy of Sciences | SCSP-511                              |
| 293T                              | Cell Bank of the Chinese Academy of Sciences | GNHu17                                |
| <b>Experimental models</b>        |                                              |                                       |
| C57BL/6-Gfat1 <sup>+/-</sup> mice | Shanghai                                     | SHANGHAI MODEL ORGANISMS              |
| C57BL/6                           | Beijing                                      | Beijing Speifu Biotechnology Co., Ltd |
