# Supplementary material
Source: PubMed Central journal article supplement (PMC10482833)
Supplement: 41418_2023_1198_MOESM2_ESM.pdf [file 41418_2023_1198_MOESM2_ESM.pdf]

Figure 1N

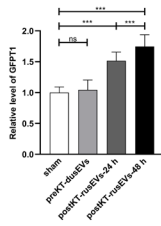

Figure 3D

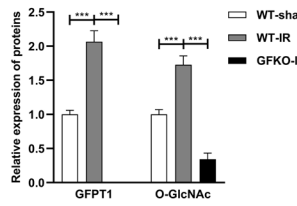

Figure 3N

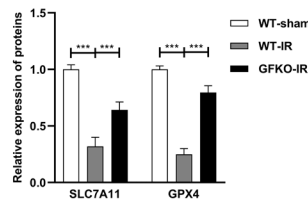

Figure 5H

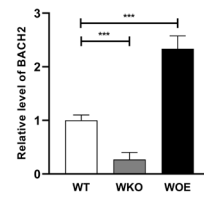

Figure 5J

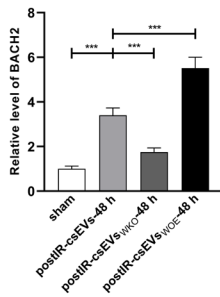

Figure 5L

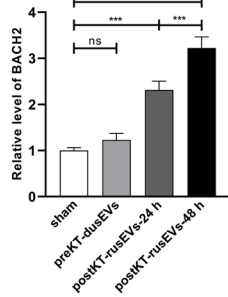

Figure 5N

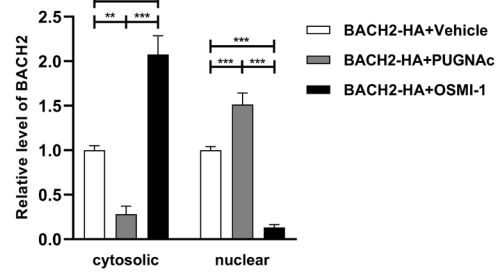

Figure 7K

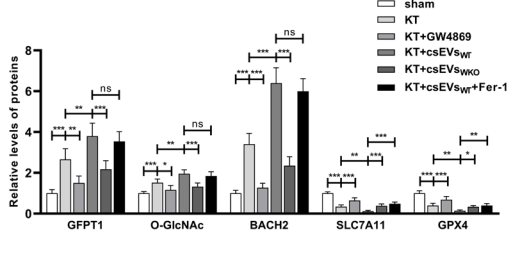

Figure S4D

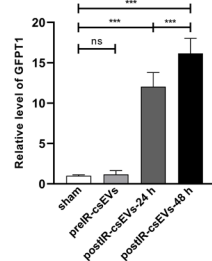

Figure S5E

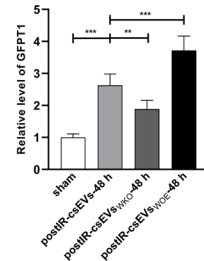

Figure S7C

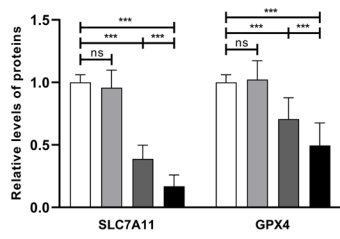

Figure S7F

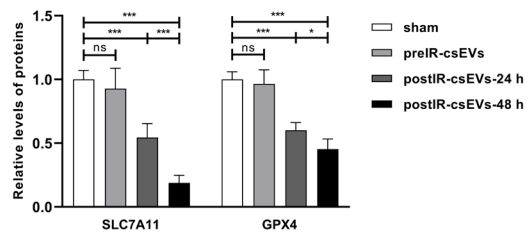

Figure S9A

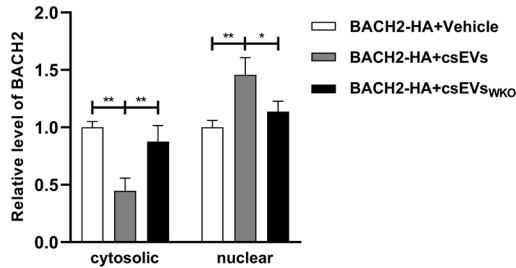

Figure S9B

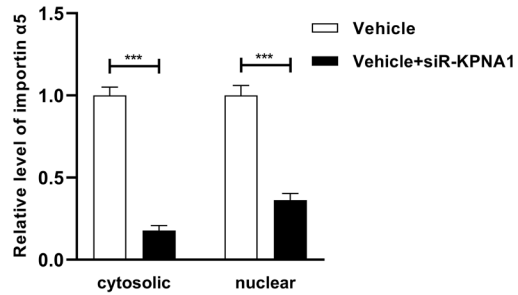

Figure S9B

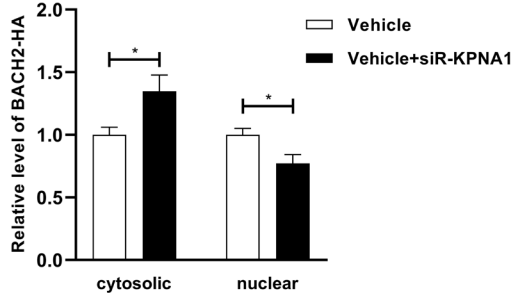

Figure S10H

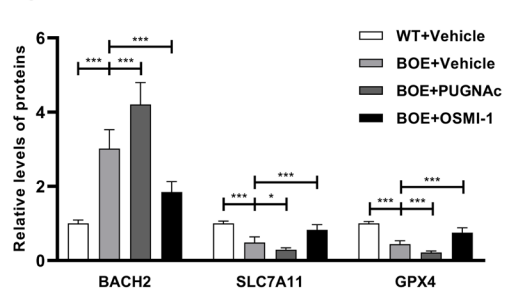

**Supplementary File2:** The quantitative analyses of IB assays; the results were normalized according to the sham or vehicle group; unpaired 2-tailed Student's t test was used for analyses in Figure S9B; one-way ANOVA followed by Tukey's test was used for analyses in other Figures; \*\*\* $p < 0.001$ , \*\* $p < 0.01$ , and \* $p < 0.05$  represent significant differences between two groups; ns represents no significant difference.
